# Supplementary material for: Theoretical investigation on the mechanism of Cu(ii)-catalyzed synthesis of 4-quinolones: effects of additives HOTf vs. HOTs
Source: Royal Society of Chemistry journal article supplement (doi:10.1039/c9nj00082h), 2019-01-01
Supplement: c9nj00082h1.pdf [file c9nj00082h1.pdf]

# Theoretical Investigation on the Mechanism of Cu(II)-catalyzed Synthesis of 4-Quinolones: Effects of Additives HOTf vs. HOTs

Binfang Yuan,<sup>a,b</sup> Xiaogang Guo,<sup>a</sup> Guangzhao Wang,<sup>c</sup> Huisheng Huang,<sup>a</sup> Fulan Zhang,<sup>a</sup> Jianhua Xu\*,<sup>a</sup>  
Rongxing He\*<sup>b</sup>

<sup>a</sup> Chongqing Key Laboratory of Inorganic Special Functional Materials, College of Chemistry and Chemical Engineering, Yangtze Normal University, Fuling, Chongqing 408100, China.

<sup>b</sup> College of Chemistry and Chemical Engineering, Southwest University, Chongqing 400715, China.

<sup>c</sup> College of Electronic Information Engineering, Key Laboratory of Extraordinary Bond Engineering and Advanced Materials, Technology, Yangtze Normal University, Fuling, Chongqing 408100, China.

## Table-of-Contents

Table S1. Exploring the effects of methods B3LYP, CAM-B3LYP, BLYP, B3P86, B3PW91, BHandHLYP and PBE by comparing the activation free energy barriers from **in5-HOTf** to **ts4-HOTf** (the geometric structures of **in5-HOTf** and **ts4-HOTf** are optimized using B3LYP (CAM-B3LYP, BLYP, B3P86, B3PW91, BHandHLYP and PBE)/6-31G\* in gas phase, and the single point energies are obtained at the M06-2X/6-311++G\*\* calculated level in solution phase).....3

Table S2. Exploring the effects of basis sets 6-31G\*, 6-31G\*\*, 6-31+G\* and 6-311G\* by comparing the activation free energy barriers from **in5-HOTf** to **ts4-HOTf** (the geometric structures of **in5-HOTf** and **ts4-HOTf** are optimized using B3LYP/6-31G\* (6-31G\*\*, 6-31+G\* and 6-311G\*) in gas phase, and the single point energies are obtained at the M06-2X/6-311++G\*\* calculated level in solution phase).....4

Scheme S1. The possible mechanisms of Cu(OTf)<sub>2</sub>-catalyzed alkynes (**1a**) with anilines (**2a**) to form 4-quinolones (**P**).....5

Figure S1. Scan profile along with the formation of N1-Cu bond (from 3.085 to 1.885 Å).....6

|                                                                                                                                                                                   |    |
|-----------------------------------------------------------------------------------------------------------------------------------------------------------------------------------|----|
| Figure S2. IRC of <b>ts2-OTf</b> .....                                                                                                                                            | 7  |
| Figure S3. Scan profile from <b>in8-OTf</b> to <b>in7</b> via <b>ts5-OTf</b> along with the formation of O2-H2 bond (from 1.560 to 0.980 Å).....                                  | 8  |
| Figure S4. IRC of <b>ts5-HOTf</b> .....                                                                                                                                           | 9  |
| Figure S5. Scan profile from <b>in8-HOTf</b> to <b>in7</b> via <b>ts6-HOTf</b> along with the cleavage of O10-H2 bond (from 1.591 to 0.991 Å).....                                | 10 |
| Figure S6. Optimized geometries involved in the Cu(OTf) <sub>2</sub> -catalyzed reaction with the participation of HOTs. Bond distances are given in Å.....                       | 11 |
| Table S3. The Mulliken charges of HOTf and HOTs.....                                                                                                                              | 12 |
| Table S4. Dissociation energies for H-O bonds in HOTf and HOTs at PCM//M06-2X/6-311++G**//B3LYP/6-31G* level.....                                                                 | 13 |
| Figure S7. The bond lengths of O-H in HOTf and HOTs.....                                                                                                                          | 14 |
| Figure S8. Optimized geometries of the intermolecular nucleophilic addition of <b>1a</b> with <b>2a</b> ( <b>Step I</b> ) without the participation of Cu(OTf) <sub>2</sub> ..... | 15 |
| Figure S9. Scan profile from <b>in5'</b> to <b>in6'</b> along with the formation of C1-C5 bond (from 3.578 to 1.578 Å).....                                                       | 16 |
| Intrinsic Reaction Coordinates.....                                                                                                                                               | 17 |
| Cartesian coordinates of the optimized stationary points on the optimal reaction channels.....                                                                                    | 20 |

To whom correspondence should be addressed. E-mail: herx@swu.edu.cn

Table S1. Exploring the effects of methods B3LYP, CAM-B3LYP, BLYP, B3P86, B3PW91, BHandHLYP and PBE by comparing the activation free energy barriers from **in5-HOTf** to **ts4-HOTf** (the geometric structures of **in5-HOTf** and **ts4-HOTf** are optimized using B3LYP (CAM-B3LYP, BLYP, B3P86, B3PW91, BHandHLYP and PBE)/6-31G\* in gas phase, and the single point energies are obtained at the M06-2X/6-311++G\*\* calculated level in solution phase).

| Species         | Activation Free Energy Barriers (kJ/mol) |           |       |       |        |                |       |
|-----------------|------------------------------------------|-----------|-------|-------|--------|----------------|-------|
|                 | B3LYP                                    | CAM-B3LYP | BLYP  | B3P86 | B3PW91 | BHandHLYP<br>P | PBE   |
| <b>ts4-HOTf</b> | 135.0                                    | 141.2     | 130.0 | 133.0 | 138.3  | 139.7          | 139.4 |

Table S1 shows that the effect of DFT functionals B3LYP, CAM-B3LYP, BLYP, B3P86, B3PW91, BHandHLYP and PBE on the activation free energy barriers is very small.

Table S2. Exploring the effects of basis sets 6-31G\*, 6-31G\*\*, 6-31+G\* and 6-311G\* by comparing the activation free energy barriers from **in5-HOTf** to **ts4-HOTf** (the geometric structures of **in5-HOTf** and **ts4-HOTf** are optimized using B3LYP/6-31G\* (6-31G\*\*, 6-31+G\* and 6-311G\*) in gas phase, and the single point energies are obtained at the M06-2X/6-311++G\*\* calculated level in solution phase).

| Species         | Activation Free Energy Barriers (kJ/mol) |         |         |         |
|-----------------|------------------------------------------|---------|---------|---------|
|                 | 6-31G*                                   | 6-31G** | 6-31+G* | 6-311G* |
| <b>ts4-HOTf</b> | 135.0                                    | 134.1   | 136.3   | 143.5   |

Scheme S1. The possible mechanisms of  $\text{Cu}(\text{OTf})_2$ -catalyzed alkynes (**1a**) with anilines (**2a**) to form 4-quinolones (**P**).

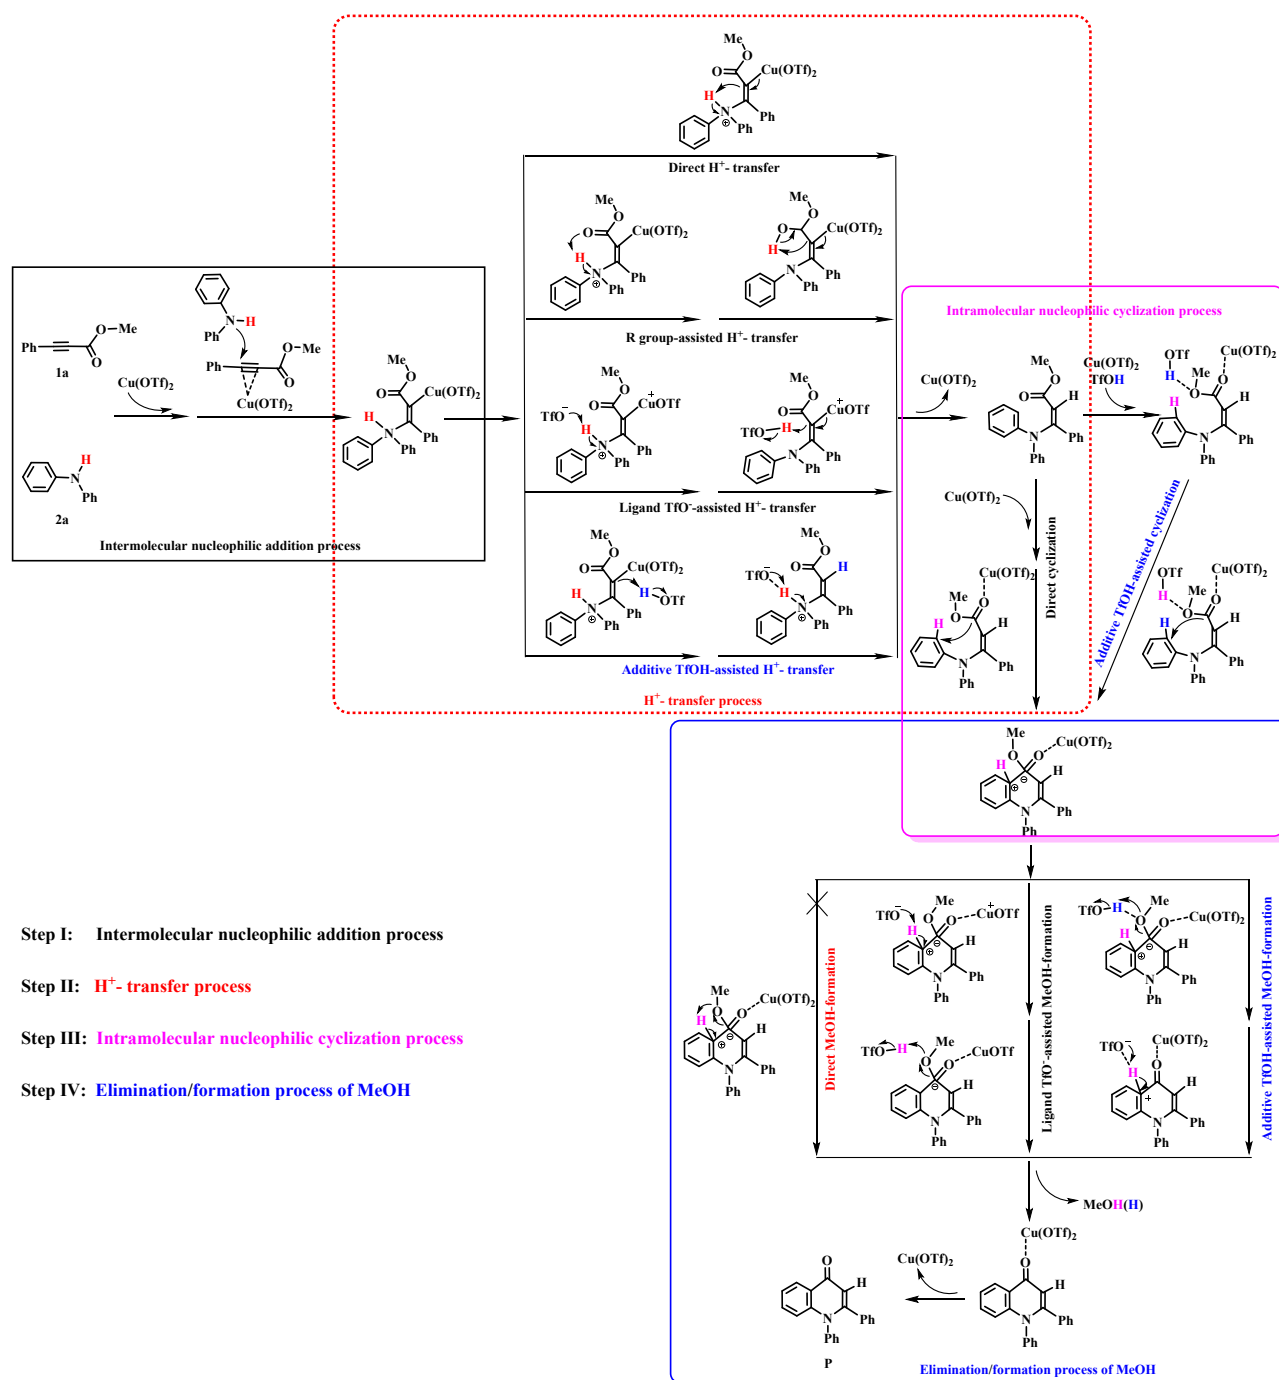

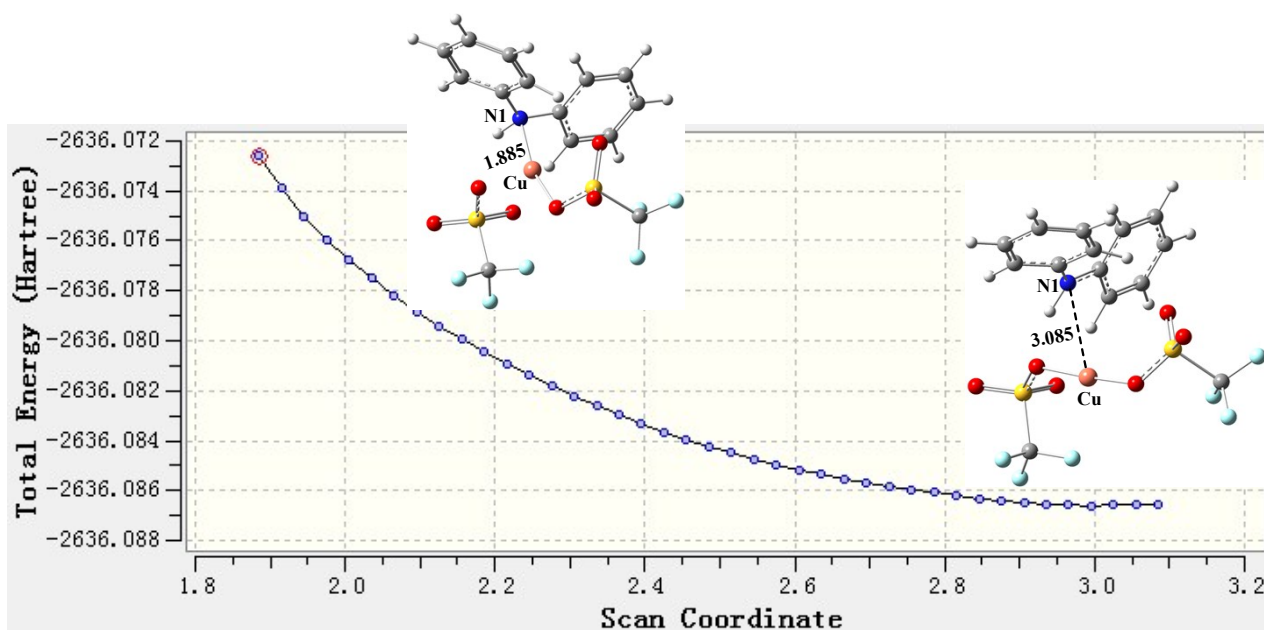

Figure S1. Scan profile along with the formation of N1-Cu bond (from 3.085 to 1.885 Å).

The coordination ability of **2a** with Cu(OTf)<sub>2</sub> is tested. The scan profile shows that the energy is rising sharply along with the formation of N1-Cu bond (from 3.085 to 1.885 Å). Obviously, the coordination of **2a** with Cu(OTf)<sub>2</sub> is unfavorable for the present catalytic reactions.

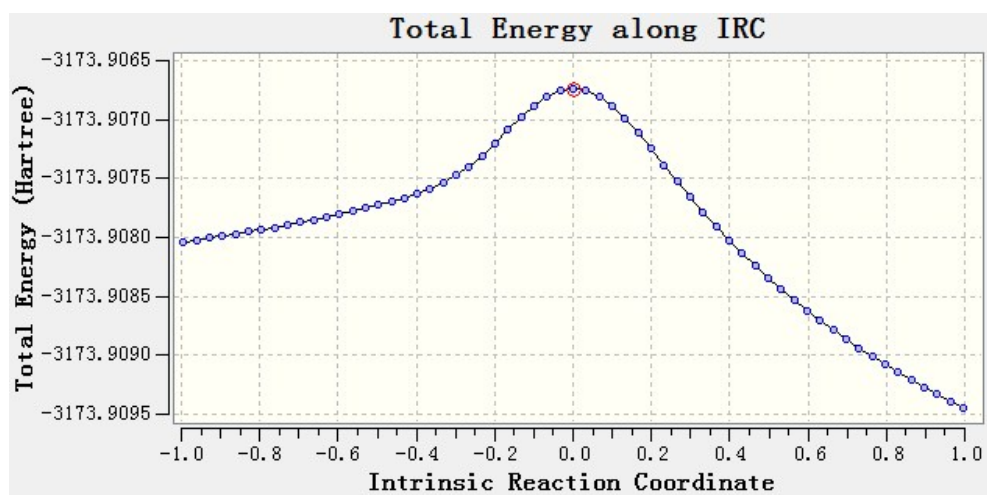

Figure S2. IRC of ts2-OTf.

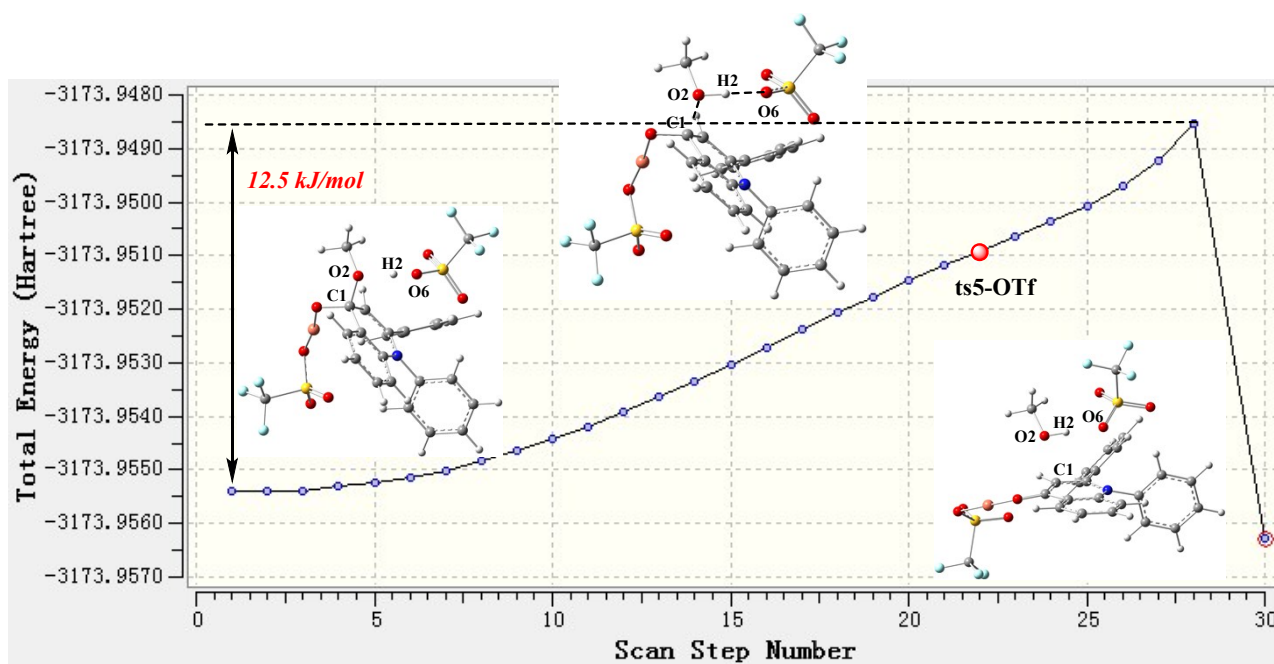

Figure S3. Scan profile from **in8-OTf** to **in7** via **ts5-OTf** along with the formation of O2-H2 bond (from 1.560 to 0.980 Å).



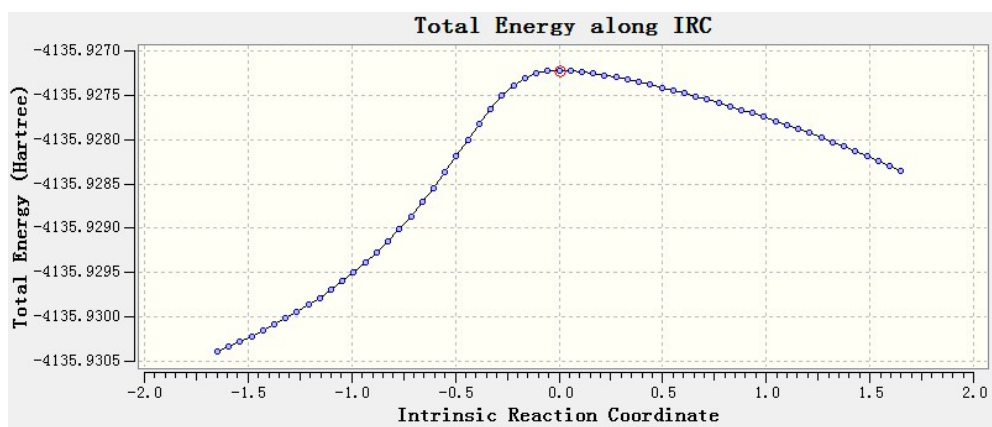

Figure S4. IRC of **ts5-HOTf**.

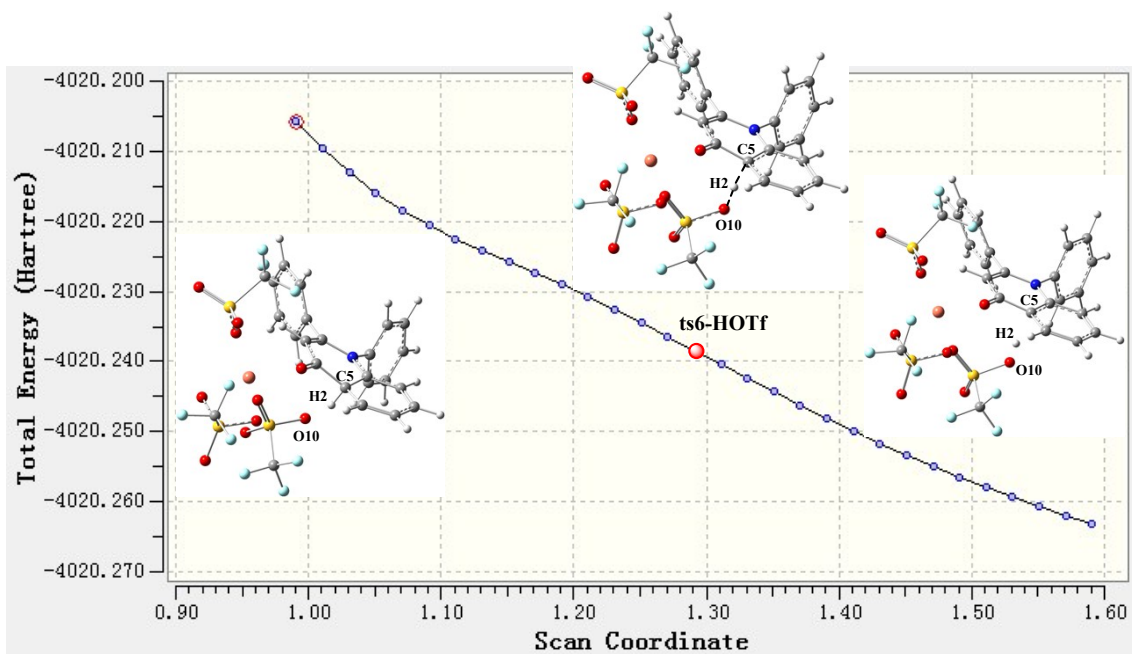

Figure S5. Scan profile from **in8-HOTf** to **in7** via **ts6-HOTf** along with the cleavage of O10-H2 bond (from 1.591 to 0.991 Å).

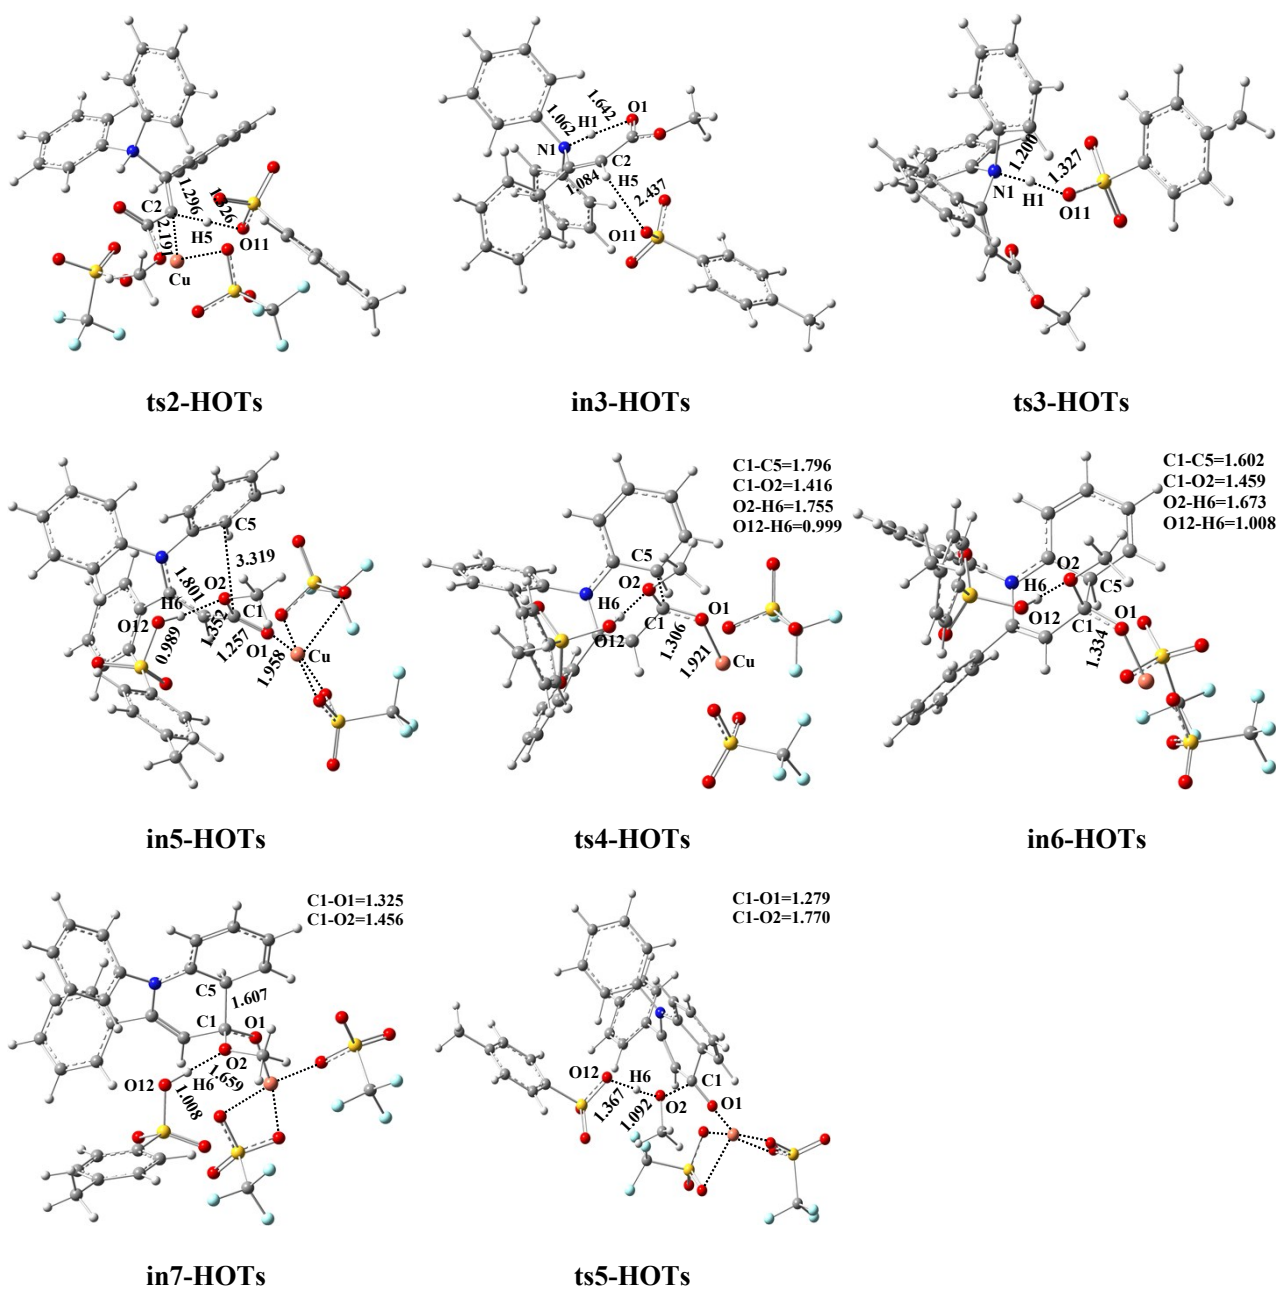

Figure S6. Optimized geometries involved in the Cu(OTf)<sub>2</sub>-catalyzed reaction with the participation of HOTs.

Bond distances are given in Å.

Table S3. The Mulliken charges of HOTf and HOTs.

| Species | Mulliken Charges |        |        |        |        |        |
|---------|------------------|--------|--------|--------|--------|--------|
|         | O                | O      | O      | S      | H      | total  |
| HOTf    | -0.451           | -0.486 | -0.620 | +1.158 | +0.455 | +0.056 |
| HOTs    | -0.533           | -0.491 | -0.637 | +1.194 | +0.438 | -0.029 |

Table S4. Dissociation energies for H-O bonds in HOTf and HOTs at PCM//M06-2X/6-311++G\*\*//B3LYP/6-31G\* level.

| <b>Species</b> | <b>Bonds</b> | <b>Dissociation Energies (kJ/mol)</b> |
|----------------|--------------|---------------------------------------|
| <b>HOTf</b>    | H-O10        | 638.5                                 |
| <b>HOTs</b>    | H-O12        | 701.0                                 |

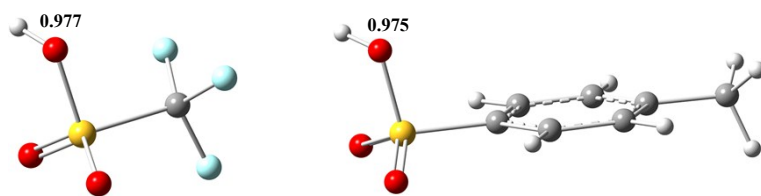

Figure S7. The bond lengths of O-H in HOTf and HOTs.

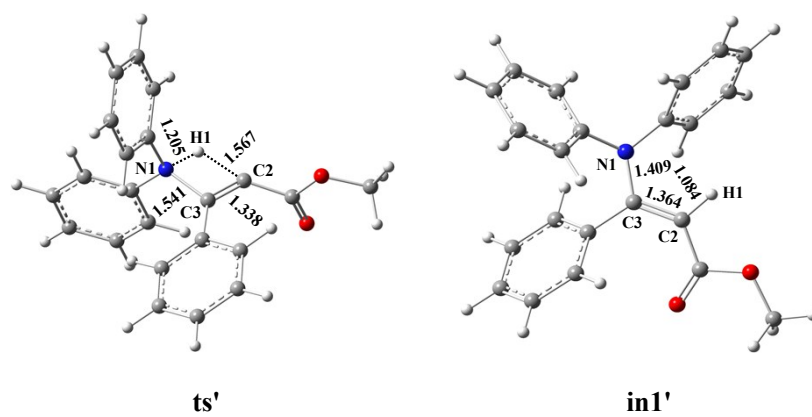

Figure S8. Optimized geometries of the intermolecular nucleophilic addition of **1a** with **2a** (**Step I**) without the participation of  $\text{Cu}(\text{OTf})_2$ .

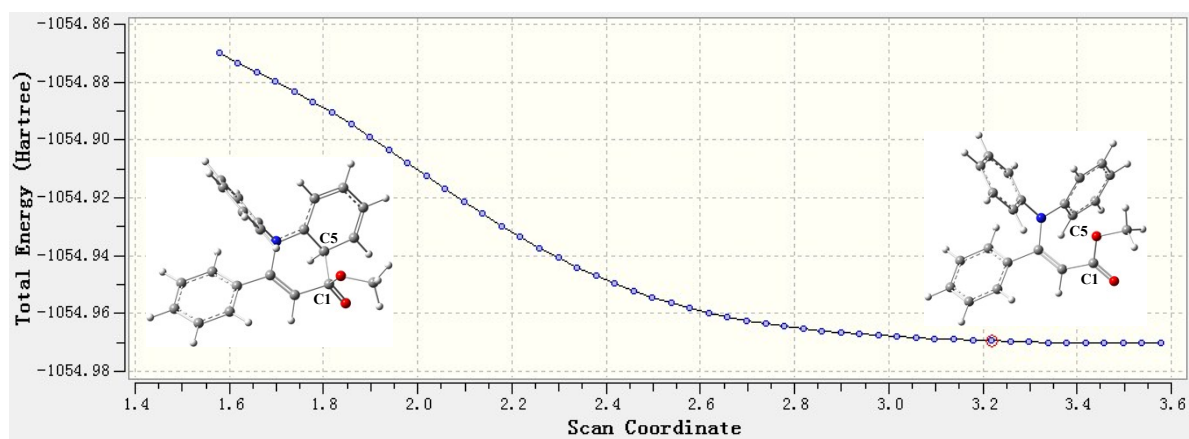

Figure S9. Scan profile from **in5'** to **in6'** along with the formation of C1-C5 bond (from 3.578 to 1.578 Å).

The scan profile of Figure S9 shows that the energy curve is sharp rising in energy with the formation of C1-C5 bond from **in5'** to **in6'**.



## Intrinsic Reaction Coordinates

When the animation of transition state's vibrations cannot easily confirm the reliability of transition states, the intrinsic reaction coordinate (IRC) calculations is conducted to unambiguously identify the transition states, which are connected with the reactants and the products.

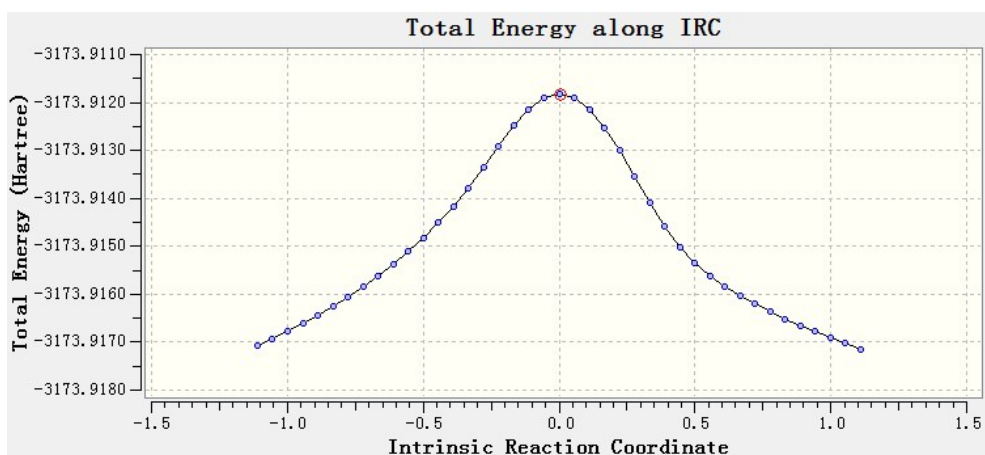

Figure S10. IRC of **ts4-OTf**.

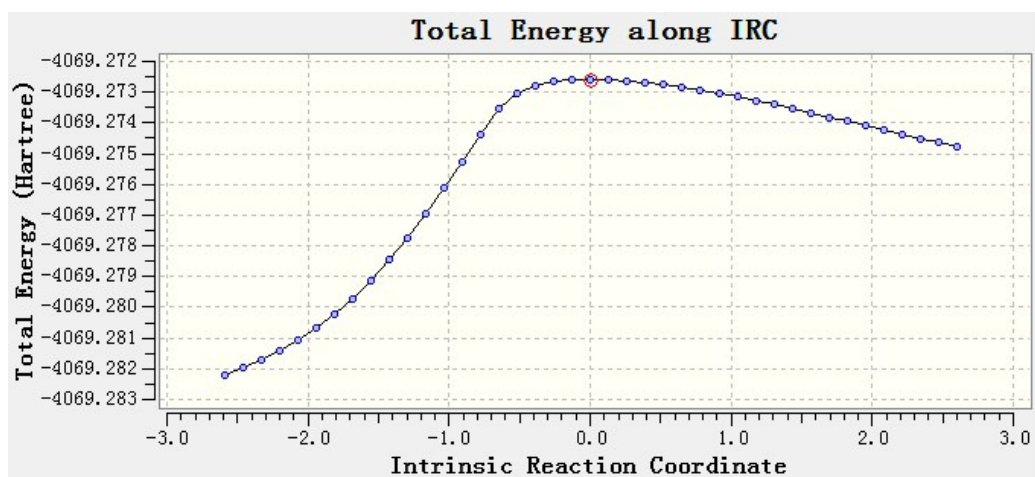

Figure S11. IRC of ts5-HOTs.

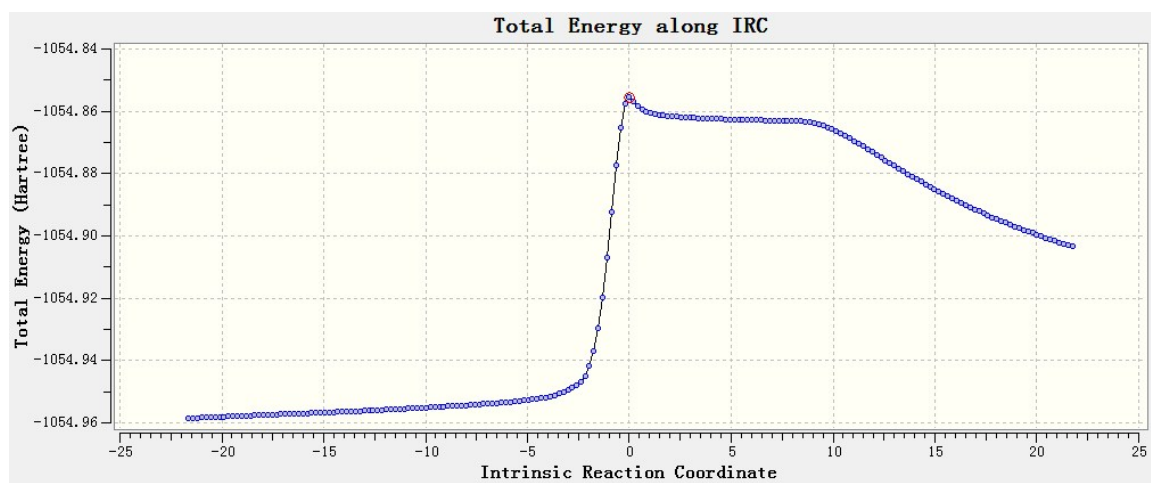

Figure S12. IRC of **ts1'**.

## Cartesian coordinates of the optimized stationary points on the optimal reaction channels

The solution-phase Gibbs free energy is determined by adding the solvation single-point energy (energy) and gas-phase thermal correction to the Gibbs free energy obtained from vibrational frequency calculation. Unless special emphasis, all the discussed energies are relative solution-phase Gibbs free energies ( $G_{\text{rel}}$ , kJ/mol) in this paper.

### Cu(OTf)<sub>2</sub>

|    |             |             |             |
|----|-------------|-------------|-------------|
| O  | 1.61852100  | -0.76748100 | -1.18301600 |
| C  | -3.17200200 | 1.07994400  | 0.00045600  |
| O  | -1.61780000 | -0.76592900 | -1.18403300 |
| O  | -1.61851300 | -0.76780500 | 1.18279700  |
| F  | -3.89941800 | 1.29848700  | -1.08848200 |
| F  | -3.89955800 | 1.29678600  | 1.08964700  |
| F  | -2.10526100 | 1.88439700  | 0.00116100  |
| Cu | 0.00000100  | -0.76063500 | -0.00011200 |
| O  | 1.61779300  | -0.76625700 | 1.18381300  |
| C  | 3.17200000  | 1.07994600  | -0.00015000 |
| F  | 2.10525800  | 1.88439600  | -0.00062000 |
| F  | 3.89942000  | 1.29817900  | 1.08884800  |
| F  | 3.89955100  | 1.29709900  | -1.08928300 |
| S  | 2.58334500  | -0.69209800 | 0.00066300  |
| S  | -2.58334300 | -0.69209800 | -0.00085700 |
| O  | 3.74688800  | -1.55300600 | 0.00147500  |
| O  | -3.74688600 | -1.55300700 | -0.00190000 |

### B3LYP/6-31G\* (Lanl2DZ for Cu)

Thermal correction to Gibbs Free Energy = 0.007716

Sum of electronic and thermal Free Energies = -2118.994860

### M06-2X/6-311++G\*\* (Lanl2DZ for Cu)

Energy = -2119.0429148

No imaginary frequency

### 1a

|   |             |             |            |
|---|-------------|-------------|------------|
| C | 2.18647900  | 1.24786600  | 0.00000000 |
| C | 3.57686100  | 1.18348500  | 0.00000000 |
| C | 4.22304100  | -0.05551000 | 0.00000000 |
| C | 3.47405300  | -1.23521600 | 0.00000000 |
| C | 2.08322700  | -1.18150600 | 0.00000000 |
| C | 1.42372900  | 0.06340000  | 0.00000000 |
| C | 0.00000000  | 0.12554100  | 0.00000000 |
| C | -1.21320700 | 0.17402400  | 0.00000000 |
| C | -2.64830900 | 0.31491500  | 0.00000000 |
| O | -3.25633700 | -0.89285200 | 0.00000000 |
| O | -3.23759400 | 1.37710500  | 0.00000000 |
| C | -4.69309200 | -0.84497600 | 0.00000000 |

|   |             |             |             |
|---|-------------|-------------|-------------|
| H | 1.67623000  | 2.20587100  | 0.00000000  |
| H | 4.15827900  | 2.10117600  | 0.00000000  |
| H | 5.30859300  | -0.10174700 | 0.00000000  |
| H | 3.97571000  | -2.19886200 | 0.00000000  |
| H | 1.49382500  | -2.09300900 | 0.00000000  |
| H | -5.01636100 | -1.88617800 | 0.00000000  |
| H | -5.06076400 | -0.32671100 | 0.88973200  |
| H | -5.06076400 | -0.32671100 | -0.88973200 |

B3LYP/6-31G\*

Thermal correction to Gibbs Free Energy = 0.114859

Sum of electronic and thermal Free Energies = -536.156344

M06-2X/6-311++G\*\*

Energy = -536.2005425

No imaginary frequency

**2a**

|   |             |             |             |
|---|-------------|-------------|-------------|
| C | 1.50142800  | 0.85513200  | -0.51800400 |
| C | 2.79557400  | 1.37308800  | -0.53905000 |
| C | 3.88088900  | 0.62052800  | -0.08748500 |
| C | 3.65397000  | -0.67239300 | 0.38951800  |
| C | 2.36479300  | -1.19498100 | 0.43161100  |
| C | 1.26724500  | -0.43851600 | -0.01899100 |
| N | 0.00000700  | -1.03129200 | -0.00003900 |
| C | -1.26724800 | -0.43845300 | 0.01899400  |
| C | -2.36479500 | -1.19500700 | -0.43154400 |
| C | -3.65394100 | -0.67243600 | -0.38945400 |
| C | -3.88088000 | 0.62053800  | 0.08752700  |
| C | -2.79561200 | 1.37311600  | 0.53904200  |
| C | -1.50141500 | 0.85517300  | 0.51793800  |
| H | 0.67805800  | 1.44069000  | -0.91085000 |
| H | 2.95447300  | 2.37504200  | -0.92983200 |
| H | 4.88566900  | 1.03189000  | -0.11065900 |
| H | 4.48463500  | -1.27841000 | 0.74212700  |
| H | 2.19516400  | -2.19635900 | 0.82220900  |
| H | -0.00004800 | -2.04136700 | -0.00045800 |
| H | -2.19514000 | -2.19641300 | -0.82205500 |
| H | -4.48468000 | -1.27839700 | -0.74198600 |
| H | -4.88571800 | 1.03176400  | 0.11062200  |
| H | -2.95442900 | 2.37509300  | 0.92979600  |
| H | -0.67807900 | 1.44078800  | 0.91075600  |

B3LYP/6-31G\*

Thermal correction to Gibbs Free Energy = 0.161536

Sum of electronic and thermal Free Energies = -518.490281

M06-2X/6-311++G\*\*

Energy = -518.5662263

No imaginary frequency

OTf-assisted reaction

**in1**

|    |             |             |             |
|----|-------------|-------------|-------------|
| C  | -2.00264000 | 3.88319500  | 0.31870600  |
| C  | -2.89108900 | 4.72144100  | -0.34133900 |
| C  | -4.06647400 | 4.19828100  | -0.89495300 |
| C  | -4.35959500 | 2.83405100  | -0.79144900 |
| C  | -3.48603700 | 1.97706300  | -0.13203600 |
| C  | -2.29871500 | 2.50427700  | 0.42908100  |
| C  | -1.41000600 | 1.64621600  | 1.11009200  |
| C  | -0.60453800 | 0.86416100  | 1.62422600  |
| C  | 0.01368500  | 0.08386400  | 2.70940700  |
| O  | 1.05698700  | -0.60943000 | 2.21483600  |
| O  | -0.36318700 | 0.08419200  | 3.85300100  |
| C  | 1.66559600  | -1.56945200 | 3.10771800  |
| H  | -1.08549300 | 4.26972200  | 0.75142100  |
| H  | -2.67119900 | 5.78089800  | -0.42925600 |
| H  | -4.75576200 | 4.85915700  | -1.41308600 |
| H  | -5.27038700 | 2.43777800  | -1.22958400 |
| H  | -3.68475800 | 0.91224400  | -0.05418600 |
| H  | 2.54611500  | -1.92990000 | 2.57920700  |
| H  | 1.94125600  | -1.08548500 | 4.04632000  |
| H  | 0.95811600  | -2.38083100 | 3.29046500  |
| S  | -1.84859000 | -1.85724100 | -0.01227400 |
| O  | -0.87940800 | -1.00675200 | -0.86592900 |
| C  | 4.14762000  | 0.23247700  | -0.34280500 |
| S  | 2.69876200  | 1.05783000  | -1.17890500 |
| O  | 1.85965100  | 1.59810900  | -0.01948600 |
| O  | 1.85180300  | -0.08172000 | -1.70195000 |
| F  | 3.70069800  | -0.71960100 | 0.48420800  |
| F  | 4.93188000  | -0.31577500 | -1.26578200 |
| F  | 4.83154100  | 1.13772400  | 0.35282400  |
| Cu | 0.42200000  | 0.20294800  | -0.18854400 |
| O  | -1.26743000 | -2.22255300 | 1.28531900  |
| C  | -1.85981800 | -3.41102300 | -1.03742800 |
| F  | -0.62605900 | -3.91691200 | -1.10728300 |
| F  | -2.66754700 | -4.30349300 | -0.45931700 |
| F  | -2.30085800 | -3.14814800 | -2.26792000 |
| O  | -3.21598400 | -1.32911000 | -0.04990100 |
| O  | 3.24088700  | 2.02352000  | -2.11595900 |

B3LYP/6-31G\* (Lanl2DZ for Cu)

Thermal correction to Gibbs Free Energy = 0.141508

Sum of electronic and thermal Free Energies = -2655.132825

M06-2X/6-311++G\*\* (Lanl2DZ for Cu)

Energy = -2655.2681840

No imaginary frequency

**ts1**

|    |             |             |             |
|----|-------------|-------------|-------------|
| C  | -1.82119500 | -2.04985500 | 1.96475500  |
| C  | -2.19537800 | -2.24104900 | 3.29048800  |
| C  | -2.26215400 | -1.15065400 | 4.16567300  |
| C  | -1.95495800 | 0.13545800  | 3.71541800  |
| C  | -1.58730500 | 0.34808800  | 2.38819300  |
| C  | -1.51180100 | -0.75158100 | 1.50563200  |
| C  | -1.09871700 | -0.53650100 | 0.14878700  |
| C  | -0.11347300 | -0.31306600 | -0.64400200 |
| C  | -0.01004000 | -0.06427100 | -2.09583700 |
| O  | 1.26287800  | 0.04384900  | -2.47180100 |
| O  | -0.95499300 | 0.00225600  | -2.87330700 |
| C  | 1.49976400  | 0.45475000  | -3.83434000 |
| H  | -1.74969100 | -2.89129800 | 1.28471400  |
| H  | -2.42251800 | -3.24140400 | 3.64685400  |
| H  | -2.54583600 | -1.30818900 | 5.20269600  |
| H  | -1.99701000 | 0.97860300  | 4.39853600  |
| H  | -1.33013600 | 1.34098200  | 2.03147200  |
| H  | 2.58227600  | 0.44002700  | -3.95148200 |
| H  | 1.02071800  | -0.23809300 | -4.52927500 |
| H  | 1.10691700  | 1.46405900  | -3.97402700 |
| S  | 0.82393500  | 2.80323100  | 0.05991700  |
| O  | 1.84932900  | 1.73175600  | 0.45197300  |
| C  | 4.55972200  | -2.42233400 | -0.39057900 |
| S  | 3.38093800  | -2.09723900 | 1.01329400  |
| O  | 2.01015400  | -2.21753800 | 0.35568700  |
| O  | 3.52689300  | -0.62267400 | 1.28876800  |
| F  | 4.29712000  | -1.57465500 | -1.39418600 |
| F  | 5.81315100  | -2.24069100 | 0.02128300  |
| F  | 4.41068900  | -3.67440800 | -0.82574400 |
| Cu | 1.69045000  | -0.19052800 | 0.29743700  |
| O  | 0.33678100  | 2.66474700  | -1.32262400 |
| C  | 1.94424000  | 4.28800300  | 0.04819800  |
| F  | 2.91125900  | 4.12654600  | -0.86035900 |
| F  | 1.22675800  | 5.37154200  | -0.27083000 |
| F  | 2.49553300  | 4.46803900  | 1.24932700  |
| O  | -0.17190300 | 3.05283400  | 1.11009000  |
| O  | 3.70175900  | -3.04809000 | 2.06467200  |
| C  | -4.39845800 | 0.72447500  | 0.65677500  |
| C  | -5.00681700 | 1.90470600  | 1.08452600  |
| C  | -4.81757800 | 3.09553900  | 0.38170000  |
| C  | -4.00391800 | 3.10591900  | -0.75407300 |

|   |             |             |             |
|---|-------------|-------------|-------------|
| C | -3.40055900 | 1.93293200  | -1.19914200 |
| C | -3.61221900 | 0.73224300  | -0.50507000 |
| N | -2.92406300 | -0.43459000 | -0.95981100 |
| C | -3.56254300 | -1.72211800 | -1.07210800 |
| C | -2.75769900 | -2.81231800 | -1.43914500 |
| C | -3.32107200 | -4.07402100 | -1.60995700 |
| C | -4.69150700 | -4.26817900 | -1.41620600 |
| C | -5.49214400 | -3.18200700 | -1.06519800 |
| C | -4.93868500 | -1.91107000 | -0.89622600 |
| H | -4.52578000 | -0.18968300 | 1.22514800  |
| H | -5.62023400 | 1.89130500  | 1.98092900  |
| H | -5.28823800 | 4.01230700  | 0.72423900  |
| H | -3.83064100 | 4.03122900  | -1.29496100 |
| H | -2.74960300 | 1.94664200  | -2.06809200 |
| H | -2.38435000 | -0.23255000 | -1.81511400 |
| H | -1.69263600 | -2.66744000 | -1.58797200 |
| H | -2.68441300 | -4.90724400 | -1.89328900 |
| H | -5.12883100 | -5.25395800 | -1.54380100 |
| H | -6.56191400 | -3.31384100 | -0.92935400 |
| H | -5.58146500 | -1.07289100 | -0.65826400 |

B3LYP/6-31G\* (Lan12DZ for Cu)

Thermal correction to Gibbs Free Energy = 0.329445

Sum of electronic and thermal Free Energies = -3173.593559

M06-2X/6-311++G\*\* (Lan12DZ for Cu)

Energy = -3173.8487484

Number of Imaginary Frequencies = 1

Lowest Frequency = 211.67i

## in2

|   |             |             |             |
|---|-------------|-------------|-------------|
| C | -2.16233500 | -1.74028700 | 2.10502200  |
| C | -2.16331500 | -1.94570200 | 3.48378600  |
| C | -1.48659200 | -1.06431600 | 4.32975600  |
| C | -0.81559400 | 0.03234400  | 3.78808400  |
| C | -0.81157200 | 0.24650700  | 2.40936200  |
| C | -1.47581300 | -0.64652400 | 1.54787700  |
| C | -1.38817500 | -0.40993800 | 0.08484100  |
| C | -0.25787100 | -0.19013200 | -0.60187600 |
| C | -0.25724800 | 0.13090700  | -2.04922300 |
| O | 0.96611800  | 0.11185800  | -2.56299300 |
| O | -1.26004000 | 0.36986500  | -2.73583300 |
| C | 1.10660000  | 0.57646500  | -3.92106400 |
| H | -2.67419000 | -2.45131500 | 1.46661800  |
| H | -2.68397000 | -2.80592500 | 3.89543900  |
| H | -1.48487100 | -1.23169100 | 5.40317400  |
| H | -0.29829300 | 0.73474600  | 4.43509400  |



|    |             |             |             |
|----|-------------|-------------|-------------|
| H  | -0.32832900 | 1.13146200  | 2.00659800  |
| H  | 2.16054800  | 0.44247900  | -4.16043000 |
| H  | 0.47455200  | -0.00949600 | -4.59184500 |
| H  | 0.82792100  | 1.63143100  | -3.96453300 |
| S  | 1.02420100  | 2.86901200  | -0.04020400 |
| O  | 1.97405200  | 1.70132500  | 0.21968300  |
| C  | 4.18470700  | -2.75203400 | -0.39519700 |
| S  | 3.07707800  | -2.23740200 | 1.00949200  |
| O  | 1.68196600  | -2.31406600 | 0.41285800  |
| O  | 3.33954900  | -0.75825400 | 1.15829100  |
| F  | 3.93088700  | -1.99038100 | -1.46771800 |
| F  | 5.46122400  | -2.60230700 | -0.04385900 |
| F  | 3.95715900  | -4.03046400 | -0.70522800 |
| Cu | 1.53544800  | -0.21927700 | 0.23579100  |
| O  | 0.31217800  | 2.77440800  | -1.33011500 |
| C  | 2.27194900  | 4.22989900  | -0.26513100 |
| F  | 3.07952900  | 3.95103500  | -1.29391400 |
| F  | 1.62945800  | 5.37673400  | -0.51849600 |
| F  | 3.00479100  | 4.37675000  | 0.84003700  |
| O  | 0.22369700  | 3.23619800  | 1.13586500  |
| O  | 3.38408400  | -3.11602400 | 2.12682600  |
| C  | -4.56104800 | 0.43015800  | 0.87230100  |
| C  | -5.29263600 | 1.46272500  | 1.45991800  |
| C  | -5.02378100 | 2.79387400  | 1.13329000  |
| C  | -4.01583200 | 3.09846000  | 0.21723500  |
| C  | -3.27986400 | 2.07722900  | -0.38509800 |
| C  | -3.57242000 | 0.75379800  | -0.05516800 |
| N  | -2.71666500 | -0.28992600 | -0.67786900 |
| C  | -3.37044400 | -1.57282900 | -1.08068000 |
| C  | -2.62119600 | -2.74844300 | -1.10521200 |
| C  | -3.20911100 | -3.91943700 | -1.58892800 |
| C  | -4.52236300 | -3.90988500 | -2.05910700 |
| C  | -5.25017400 | -2.71879000 | -2.05383800 |
| C  | -4.67678300 | -1.54159900 | -1.57124800 |
| H  | -4.75795300 | -0.60248200 | 1.13513000  |
| H  | -6.06727400 | 1.22205300  | 2.18185300  |
| H  | -5.59275600 | 3.59225900  | 1.60046000  |
| H  | -3.78757900 | 4.13102000  | -0.02694500 |
| H  | -2.47183200 | 2.31375100  | -1.07182600 |
| H  | -2.37427500 | 0.10808800  | -1.60480500 |
| H  | -1.59485500 | -2.75878100 | -0.75485800 |
| H  | -2.62870500 | -4.83696100 | -1.59890700 |
| H  | -4.97421800 | -4.82326000 | -2.43427200 |
| H  | -6.26836600 | -2.69713200 | -2.43070500 |
| H  | -5.24215800 | -0.61697100 | -1.57895400 |

B3LYP/6-31G\* (Lanl2DZ for Cu)

Thermal correction to Gibbs Free Energy = 0.333670

Sum of electronic and thermal Free Energies = -3173.604685

M06-2X/6-311++G\*\* (Lanl2DZ for Cu)

Energy = -3173.8794283

No imaginary frequency

**in3-OTf**

|    |             |             |             |
|----|-------------|-------------|-------------|
| C  | 0.73421500  | 2.69350500  | -1.06797000 |
| C  | 1.56107500  | 3.12100800  | -2.10456000 |
| C  | 2.06345900  | 2.21136600  | -3.04586800 |
| C  | 1.71190700  | 0.86715500  | -2.96814900 |
| C  | 0.86631700  | 0.42572300  | -1.93923800 |
| C  | 0.39018500  | 1.33759400  | -0.96041200 |
| C  | -0.31000900 | 0.73583400  | 0.20623600  |
| C  | 0.32866000  | -0.26882800 | 0.81405400  |
| C  | -0.09063300 | -1.15130000 | 1.93093500  |
| O  | 0.52380600  | -2.33833000 | 1.79295100  |
| O  | -0.84581200 | -0.86038300 | 2.83489800  |
| C  | 0.11919200  | -3.37948700 | 2.70911200  |
| H  | 0.37814000  | 3.40765100  | -0.33276300 |
| H  | 1.83299600  | 4.17062700  | -2.17171400 |
| H  | 2.71571600  | 2.56026700  | -3.84081700 |
| H  | 2.07265000  | 0.15665000  | -3.70535800 |
| H  | 0.44186700  | -0.57933600 | -1.95908600 |
| H  | 0.79466000  | -4.21066300 | 2.51038000  |
| H  | 0.21853700  | -3.03254500 | 3.73996000  |
| H  | -0.91345200 | -3.65823100 | 2.49162400  |
| S  | -2.60855200 | -2.24618200 | -0.39504100 |
| O  | -2.27790400 | -3.45978200 | 0.35742900  |
| C  | 5.51410000  | 0.42106800  | -0.23266000 |
| S  | 4.59498400  | -1.13614400 | 0.21227700  |
| O  | 3.67676400  | -1.33982300 | -0.98723700 |
| O  | 3.67669800  | -0.71514900 | 1.33251400  |
| F  | 4.63090600  | 1.40371700  | -0.46974300 |
| F  | 6.30859600  | 0.78301300  | 0.77363300  |
| F  | 6.24533700  | 0.22108400  | -1.32881000 |
| Cu | 1.99873500  | -0.71809200 | -0.07101800 |
| O  | -3.08109200 | -1.09035900 | 0.46352100  |
| C  | -4.14980300 | -2.65337100 | -1.34937800 |
| F  | -5.13685900 | -3.01236000 | -0.52311200 |
| F  | -4.54939400 | -1.57893400 | -2.05310000 |
| F  | -3.91102300 | -3.65469600 | -2.20212700 |
| O  | -1.64623500 | -1.80467600 | -1.43397700 |
| O  | 5.59372800  | -2.15912300 | 0.47048300  |

|   |             |            |             |
|---|-------------|------------|-------------|
| C | -2.65518400 | 3.31237700 | -0.35035800 |
| C | -3.27778700 | 4.02718200 | -1.37569900 |
| C | -3.62463700 | 3.39273600 | -2.56905100 |
| C | -3.34561200 | 2.03557000 | -2.73894400 |
| C | -2.72182600 | 1.30618700 | -1.72602800 |
| C | -2.38248800 | 1.95868700 | -0.53955800 |
| N | -1.72431100 | 1.14620000 | 0.53405900  |
| C | -1.91349000 | 1.71691000 | 1.89518800  |
| C | -0.93599200 | 2.51534200 | 2.47961100  |
| C | -1.17968700 | 3.06559700 | 3.73992200  |
| C | -2.38613300 | 2.81488300 | 4.39477200  |
| C | -3.35229400 | 2.00559400 | 3.79217400  |
| C | -3.12226300 | 1.45086000 | 2.53424200  |
| H | -2.40381400 | 3.80473000 | 0.58125800  |
| H | -3.49606900 | 5.08130900 | -1.23160900 |
| H | -4.11473200 | 3.95225700 | -3.36057000 |
| H | -3.61830900 | 1.53088100 | -3.66088300 |
| H | -2.49880400 | 0.25328300 | -1.86290900 |
| H | -2.26525500 | 0.18960300 | 0.52279400  |
| H | 0.01211000  | 2.68750700 | 1.98071200  |
| H | -0.41971000 | 3.68356900 | 4.20869400  |
| H | -2.56923700 | 3.24036600 | 5.37706500  |
| H | -4.28554300 | 1.79374500 | 4.30510400  |
| H | -3.85313000 | 0.79825200 | 2.06787200  |

B3LYP/6-31G\* (Lanl2DZ for Cu)

Thermal correction to Gibbs Free Energy = 0.331058

Sum of electronic and thermal Free Energies = -3173.577471

M06-2X/6-311++G\*\* (Lanl2DZ for Cu)

Energy = -3173.8502334

No imaginary frequency

### ts2-OTf

|   |             |             |             |
|---|-------------|-------------|-------------|
| C | 0.67625600  | 2.76430900  | -0.90126200 |
| C | 1.50244500  | 3.30362000  | -1.88434800 |
| C | 2.03947900  | 2.49519500  | -2.89688700 |
| C | 1.72372900  | 1.14126400  | -2.94310600 |
| C | 0.88085300  | 0.58786500  | -1.96634100 |
| C | 0.36920000  | 1.39468000  | -0.91616200 |
| C | -0.33097000 | 0.68436400  | 0.19043600  |
| C | 0.34295400  | -0.35901600 | 0.69903700  |
| C | -0.03641900 | -1.32672100 | 1.75452700  |
| O | 0.61237800  | -2.48628200 | 1.53765900  |
| O | -0.79824900 | -1.12857300 | 2.67886500  |
| C | 0.26839300  | -3.57853900 | 2.41482500  |
| H | 0.28898400  | 3.39972100  | -0.11179000 |

|    |             |             |             |
|----|-------------|-------------|-------------|
| H  | 1.74557000  | 4.36204900  | -1.85496600 |
| H  | 2.68943100  | 2.93059900  | -3.64993300 |
| H  | 2.11057600  | 0.50914800  | -3.73629600 |
| H  | 0.48794300  | -0.42265700 | -2.08419400 |
| H  | 0.93697400  | -4.39145100 | 2.13364500  |
| H  | 0.42409400  | -3.28907700 | 3.45669800  |
| H  | -0.77411800 | -3.85781900 | 2.24976700  |
| S  | -2.65633200 | -2.20227900 | -0.53087500 |
| O  | -2.36101400 | -3.44108100 | 0.18327100  |
| C  | 5.56337900  | 0.43524200  | -0.09571200 |
| S  | 4.61722700  | -1.16183800 | 0.04789500  |
| O  | 3.73055800  | -1.14146400 | -1.19116000 |
| O  | 3.67454100  | -0.92928300 | 1.20150300  |
| F  | 4.69714500  | 1.45713800  | -0.17976700 |
| F  | 6.33389000  | 0.60508200  | 0.97789800  |
| F  | 6.32285400  | 0.41870300  | -1.19125000 |
| Cu | 2.02902100  | -0.66826900 | -0.21708200 |
| O  | -3.04556700 | -1.04408300 | 0.41668200  |
| C  | -4.28630400 | -2.46903600 | -1.38570400 |
| F  | -5.22771500 | -2.80098700 | -0.50140900 |
| F  | -4.65652800 | -1.34704200 | -2.01844700 |
| F  | -4.15813500 | -3.44961900 | -2.28259400 |
| O  | -1.72923800 | -1.74778100 | -1.58313200 |
| O  | 5.59948100  | -2.22816700 | 0.14813400  |
| C  | -2.73085500 | 3.27343300  | -0.07402800 |
| C  | -3.38619600 | 4.06698200  | -1.01764800 |
| C  | -3.70211100 | 3.55461800  | -2.27611700 |
| C  | -3.35898900 | 2.23848900  | -2.58989100 |
| C  | -2.70620400 | 1.43333300  | -1.65623600 |
| C  | -2.39240300 | 1.95840500  | -0.39906800 |
| N  | -1.70957100 | 1.07104800  | 0.57718800  |
| C  | -1.86721800 | 1.51649100  | 1.97897200  |
| C  | -0.85042000 | 2.20263300  | 2.63957400  |
| C  | -1.05924500 | 2.64087800  | 3.94882600  |
| C  | -2.27697600 | 2.40008500  | 4.58560600  |
| C  | -3.28856000 | 1.71312800  | 3.91051300  |
| C  | -3.08923400 | 1.26873800  | 2.60461100  |
| H  | -2.49823500 | 3.67618600  | 0.90441500  |
| H  | -3.65080300 | 5.08858600  | -0.76005200 |
| H  | -4.21588900 | 4.17463800  | -3.00508300 |
| H  | -3.60509700 | 1.82566500  | -3.56382200 |
| H  | -2.44120100 | 0.41248300  | -1.90822100 |
| H  | -2.34673400 | -0.03888500 | 0.47620900  |
| H  | 0.10487100  | 2.37484200  | 2.15438100  |
| H  | -0.26404500 | 3.16751500  | 4.46845300  |

|   |             |            |            |
|---|-------------|------------|------------|
| H | -2.43478100 | 2.73896300 | 5.60534800 |
| H | -4.23500900 | 1.51093300 | 4.40321800 |
| H | -3.86570400 | 0.71848800 | 2.08402400 |

B3LYP/6-31G\* (Lan12DZ for Cu)

Thermal correction to Gibbs Free Energy = 0.326812

Sum of electronic and thermal Free Energies = -3173.579929

M06-2X/6-311++G\*\* (Lan12DZ for Cu)

Energy = -3173.8470250

Number of Imaginary Frequencies = 1

Lowest Frequency = 893.25i

### in4-OTf

|    |             |             |             |
|----|-------------|-------------|-------------|
| C  | -2.08983200 | -2.01393200 | 2.43199400  |
| C  | -1.83175100 | -2.40693500 | 3.74233400  |
| C  | -0.84363400 | -1.75935600 | 4.49215200  |
| C  | -0.12624300 | -0.70415700 | 3.92868800  |
| C  | -0.38460500 | -0.30592600 | 2.61562500  |
| C  | -1.35374100 | -0.97212300 | 1.84215400  |
| C  | -1.54264100 | -0.64492800 | 0.40372500  |
| C  | -0.46229300 | -0.44289200 | -0.39705800 |
| C  | -0.49715500 | -0.09331700 | -1.81439700 |
| O  | -0.14716600 | -1.07479500 | -2.63592300 |
| O  | -0.72506900 | 1.05289500  | -2.24779500 |
| C  | -0.05443600 | -0.75504200 | -4.04069400 |
| H  | -2.84810100 | -2.52744700 | 1.84849800  |
| H  | -2.39510500 | -3.22691600 | 4.17900600  |
| H  | -0.64373800 | -2.07071400 | 5.51345200  |
| H  | 0.62422700  | -0.17674400 | 4.50983400  |
| H  | 0.11748600  | 0.57461300  | 2.22097300  |
| H  | 0.31313800  | -1.66497900 | -4.51323700 |
| H  | -1.03980900 | -0.48786200 | -4.42859900 |
| H  | 0.64122600  | 0.07257300  | -4.19564000 |
| S  | 0.96889600  | 2.85471400  | 0.14238600  |
| O  | 1.75243100  | 1.68223500  | -0.29501800 |
| C  | 4.74234400  | -1.69378500 | -0.51594100 |
| S  | 3.47953400  | -2.01620000 | 0.81334400  |
| O  | 2.25706100  | -2.46426100 | 0.04449300  |
| O  | 3.14180800  | -0.62711300 | 1.31748500  |
| F  | 4.22504300  | -0.85987300 | -1.42999400 |
| F  | 5.83211000  | -1.13837800 | 0.01396300  |
| F  | 5.07491100  | -2.83976100 | -1.11314400 |
| Cu | 1.34602200  | -0.52732700 | 0.32543600  |
| O  | -0.40024400 | 2.93626100  | -0.62701100 |
| C  | 1.85385000  | 4.33006200  | -0.57562100 |
| F  | 1.98745700  | 4.16791500  | -1.89115500 |

|   |             |             |             |
|---|-------------|-------------|-------------|
| F | 1.15292200  | 5.43354200  | -0.32740100 |
| F | 3.05381300  | 4.42001600  | -0.00857700 |
| O | 0.76852000  | 3.10332500  | 1.56096600  |
| O | 4.08454600  | -2.94980100 | 1.75056100  |
| C | -5.15511900 | -0.32526200 | 0.78965300  |
| C | -6.09449400 | 0.42155100  | 1.49612100  |
| C | -5.74158400 | 1.64871400  | 2.06529500  |
| C | -4.44029300 | 2.12979800  | 1.91157600  |
| C | -3.49497800 | 1.39694700  | 1.19395400  |
| C | -3.84637300 | 0.15899100  | 0.63835000  |
| N | -2.87428500 | -0.61077500 | -0.07166500 |
| C | -3.23099800 | -1.21577800 | -1.31313900 |
| C | -2.81686400 | -2.52714700 | -1.59535600 |
| C | -3.18333000 | -3.13037100 | -2.79653800 |
| C | -3.97184700 | -2.44222300 | -3.72277000 |
| C | -4.38504800 | -1.13710700 | -3.44126400 |
| C | -4.01482300 | -0.52065700 | -2.24696700 |
| H | -5.42565500 | -1.28487300 | 0.36051800  |
| H | -7.10393100 | 0.03658600  | 1.61221400  |
| H | -6.47619800 | 2.22508300  | 2.62011700  |
| H | -4.15702100 | 3.08770700  | 2.33837400  |
| H | -2.49394900 | 1.79026800  | 1.04835900  |
| H | -0.55032100 | 2.13559300  | -1.30682500 |
| H | -2.20753100 | -3.06355300 | -0.87466200 |
| H | -2.85978000 | -4.14680000 | -3.00235600 |
| H | -4.26325000 | -2.91904800 | -4.65422600 |
| H | -4.99213800 | -0.59026700 | -4.15749000 |
| H | -4.32514200 | 0.49659300  | -2.03255000 |

B3LYP/6-31G\* (Lanl2DZ for Cu)

Thermal correction to Gibbs Free Energy = 0.327107

Sum of electronic and thermal Free Energies = -3173.614036

M06-2X/6-311++G\*\* (Lanl2DZ for Cu)

Energy = -3173.86497430

No imaginary frequency

### ts3-OTf

|   |             |             |             |
|---|-------------|-------------|-------------|
| C | 2.16536700  | -0.81228000 | 2.36477100  |
| C | 2.25714900  | -1.38775500 | 3.62938800  |
| C | 1.71092800  | -2.65189500 | 3.86630600  |
| C | 1.06499900  | -3.33385200 | 2.83306800  |
| C | 0.95513000  | -2.75355500 | 1.56980300  |
| C | 1.50692900  | -1.48660800 | 1.32123500  |
| C | 1.35149900  | -0.80603200 | 0.00136800  |
| C | 0.07296500  | -0.66568500 | -0.54241600 |
| C | -0.18808000 | -0.11511100 | -1.89025200 |

|    |             |             |             |
|----|-------------|-------------|-------------|
| O  | -1.22206800 | 0.77766200  | -1.81669400 |
| O  | 0.32209300  | -0.44375100 | -2.94090600 |
| C  | -1.65894400 | 1.35961500  | -3.05829500 |
| H  | 2.57471200  | 0.17697400  | 2.18885500  |
| H  | 2.74966000  | -0.84610400 | 4.43177100  |
| H  | 1.78622900  | -3.10169600 | 4.85236300  |
| H  | 0.64267700  | -4.31910900 | 3.00842800  |
| H  | 0.45539200  | -3.29495700 | 0.77448700  |
| H  | -2.46455200 | 2.04267100  | -2.79034900 |
| H  | -0.83345400 | 1.89958900  | -3.52803700 |
| H  | -2.01914900 | 0.58082100  | -3.73432800 |
| S  | -2.93899300 | -2.48486100 | 0.02560700  |
| O  | -2.89515900 | -1.12134800 | 0.63303500  |
| C  | -1.24860000 | 3.94204500  | 0.90336000  |
| S  | -1.30420000 | 2.49418700  | 2.07725700  |
| O  | -0.12699100 | 1.64319000  | 1.61820100  |
| O  | -2.52573200 | 1.71979800  | 1.66946200  |
| F  | -1.43723000 | 3.51893400  | -0.35400100 |
| F  | -2.19452100 | 4.82467900  | 1.21585200  |
| F  | -0.04819400 | 4.53345200  | 0.97666800  |
| Cu | -1.33021200 | 0.22201000  | 0.66342100  |
| O  | -1.54887000 | -2.84100900 | -0.55390800 |
| C  | -3.96183900 | -2.26733800 | -1.51831300 |
| F  | -3.38070700 | -1.36101600 | -2.31125100 |
| F  | -4.04868700 | -3.42855900 | -2.16120300 |
| F  | -5.17704400 | -1.84623600 | -1.17855400 |
| O  | -3.53470100 | -3.55786400 | 0.79726800  |
| O  | -1.23300400 | 3.05173600  | 3.41839400  |
| C  | 4.89408800  | -0.19504600 | 0.01138900  |
| C  | 6.12232700  | -0.83353200 | 0.16968800  |
| C  | 6.23655100  | -2.20948100 | -0.04772700 |
| C  | 5.11468800  | -2.94500000 | -0.43409500 |
| C  | 3.88249100  | -2.31343200 | -0.60215500 |
| C  | 3.76914600  | -0.93918900 | -0.36497500 |
| N  | 2.50203600  | -0.28091000 | -0.55020900 |
| C  | 2.50380800  | 0.88954900  | -1.38700600 |
| C  | 1.89515200  | 2.06348500  | -0.92825800 |
| C  | 1.92323200  | 3.20902600  | -1.72467000 |
| C  | 2.56702700  | 3.19090400  | -2.96375300 |
| C  | 3.18324000  | 2.01722500  | -3.40900400 |
| C  | 3.15231100  | 0.86505600  | -2.62734200 |
| H  | 4.79998100  | 0.87267000  | 0.18223600  |
| H  | 6.99108300  | -0.25424300 | 0.46915300  |
| H  | 7.19583700  | -2.70319400 | 0.07741600  |
| H  | 5.19760300  | -4.01208600 | -0.61919800 |

|   |             |             |             |
|---|-------------|-------------|-------------|
| H | 3.01343400  | -2.87624600 | -0.92721500 |
| H | -0.81550300 | -1.93369600 | -0.48898200 |
| H | 1.41133200  | 2.08022700  | 0.04196200  |
| H | 1.44784100  | 4.11492100  | -1.36038500 |
| H | 2.59404000  | 4.08646800  | -3.57814900 |
| H | 3.68040500  | 1.99458000  | -4.37449500 |
| H | 3.60893600  | -0.05397000 | -2.97820900 |

B3LYP/6-31G\* (Lanl2DZ for Cu)

Thermal correction to Gibbs Free Energy = 0.327838

Sum of electronic and thermal Free Energies = -3173.606473

M06-2X/6-311++G\*\* (Lanl2DZ for Cu)

Energy = -3173.8655790

Number of Imaginary Frequencies = 1

Lowest Frequency = 999.59i

**in3**

|   |             |             |             |
|---|-------------|-------------|-------------|
| C | 2.27771600  | -0.58101800 | 1.49010400  |
| C | 3.53864200  | -0.95928200 | 1.94562400  |
| C | 4.19128200  | -2.05608800 | 1.37837700  |
| C | 3.57398200  | -2.77115900 | 0.35009100  |
| C | 2.31178700  | -2.39444600 | -0.10444800 |
| C | 1.64099300  | -1.29918200 | 0.46419100  |
| C | 0.26633400  | -0.93259700 | 0.02297900  |
| C | -0.62129700 | -1.91119100 | -0.31185900 |
| C | -1.90339300 | -1.72278500 | -0.99845600 |
| O | -2.60387300 | -2.89391300 | -0.99883000 |
| O | -2.31162000 | -0.71670600 | -1.55071800 |
| C | -3.85096400 | -2.85150000 | -1.70119600 |
| H | 1.77325000  | 0.27105900  | 1.93449700  |
| H | 4.01247200  | -0.39725500 | 2.74592100  |
| H | 5.17732200  | -2.34693500 | 1.73049200  |
| H | 4.08057200  | -3.61725400 | -0.10646400 |
| H | 1.84561200  | -2.93737000 | -0.92149700 |
| H | -4.27991800 | -3.84952000 | -1.59934600 |
| H | -4.51693500 | -2.10177500 | -1.26446500 |
| H | -3.69562300 | -2.60841000 | -2.75664900 |
| C | 1.01236400  | 2.64336700  | -0.00768900 |
| C | 1.86220100  | 3.55053500  | -0.63522300 |
| C | 2.51150700  | 3.21160400  | -1.82545700 |
| C | 2.28975700  | 1.95529500  | -2.39016100 |
| C | 1.42529100  | 1.04721500  | -1.77976600 |
| C | 0.78828200  | 1.37901600  | -0.57604000 |
| N | -0.06633700 | 0.43408500  | 0.05962300  |
| C | -1.27396100 | 0.87719400  | 0.68357100  |
| C | -1.61998000 | 0.38663400  | 1.94981800  |



|   |             |             |             |
|---|-------------|-------------|-------------|
| C | -2.77892900 | 0.83413100  | 2.58205100  |
| C | -3.59257100 | 1.78980400  | 1.97022900  |
| C | -3.24285100 | 2.28295400  | 0.71137500  |
| C | -2.09837600 | 1.82358200  | 0.06285200  |
| H | 0.52015100  | 2.90839000  | 0.92257000  |
| H | 2.02693300  | 4.52515400  | -0.18316300 |
| H | 3.17802400  | 3.92089500  | -2.30781300 |
| H | 2.77740900  | 1.68187200  | -3.32212100 |
| H | 1.22668700  | 0.08413300  | -2.23882800 |
| H | -0.98019400 | -0.34564300 | 2.43333500  |
| H | -3.03514700 | 0.44572600  | 3.56428200  |
| H | -4.49046900 | 2.14489200  | 2.46831000  |
| H | -3.87555100 | 3.01612100  | 0.21818400  |
| H | -1.84543600 | 2.17943200  | -0.92927400 |
| H | -0.35775300 | -2.93965200 | -0.09475600 |

B3LYP/6-31G\*

Thermal correction to Gibbs Free Energy = 0.303325

Sum of electronic and thermal Free Energies = -1054.669337

M06-2X/6-311++G\*\*

Energy = -1054.82594270

No imaginary frequency

**in4**

|   |             |             |             |
|---|-------------|-------------|-------------|
| C | 2.35478000  | -0.47848000 | 1.44964100  |
| C | 3.67051200  | -0.66447800 | 1.86776600  |
| C | 4.52243900  | -1.50903400 | 1.15256200  |
| C | 4.04915500  | -2.16527000 | 0.01449700  |
| C | 2.73243400  | -1.98124900 | -0.40286100 |
| C | 1.86327200  | -1.14215200 | 0.31333000  |
| C | 0.43846500  | -0.98894100 | -0.09510600 |
| C | -0.23930500 | -2.06250900 | -0.58473300 |
| C | -1.57059100 | -2.14268400 | -1.20708900 |
| O | -2.02879900 | -0.96225600 | -1.69214700 |
| O | -2.17974400 | -3.19025100 | -1.33603400 |
| C | -3.32195700 | -1.02297800 | -2.30921400 |
| H | 1.69436800  | 0.17597100  | 2.00967100  |
| H | 4.03123300  | -0.15033300 | 2.75455700  |
| H | 5.55029900  | -1.64937600 | 1.47602400  |
| H | 4.70922800  | -2.81346000 | -0.55562600 |
| H | 2.37474000  | -2.47369200 | -1.30241800 |
| H | -3.53917500 | -0.00408600 | -2.63168400 |
| H | -3.31001800 | -1.70335500 | -3.16524600 |
| H | -4.07478000 | -1.36588200 | -1.59452000 |
| C | 0.58537300  | 2.61566200  | 0.37383500  |
| C | 1.24154500  | 3.72950100  | -0.14351000 |

|   |             |             |             |
|---|-------------|-------------|-------------|
| C | 1.84068700  | 3.67932700  | -1.40551400 |
| C | 1.76511800  | 2.50353300  | -2.15234700 |
| C | 1.09321000  | 1.38905000  | -1.65020300 |
| C | 0.50712600  | 1.43272600  | -0.37824900 |
| N | -0.14427900 | 0.27588500  | 0.14096300  |
| C | -1.39394000 | 0.40149800  | 0.81594200  |
| C | -1.67934200 | -0.41188100 | 1.92268200  |
| C | -2.89059200 | -0.27901400 | 2.59868000  |
| C | -3.82584900 | 0.67793900  | 2.19936400  |
| C | -3.53778600 | 1.49575100  | 1.10514400  |
| C | -2.33782000 | 1.35583800  | 0.40988500  |
| H | 0.13230000  | 2.65515300  | 1.35941000  |
| H | 1.29663600  | 4.63845000  | 0.44982600  |
| H | 2.35782300  | 4.54881700  | -1.80121800 |
| H | 2.21764400  | 2.45342500  | -3.13915400 |
| H | 1.00603400  | 0.48416900  | -2.24307900 |
| H | 0.23042400  | -3.03625300 | -0.50335900 |
| H | -0.95292800 | -1.15048100 | 2.24676800  |
| H | -3.09526700 | -0.91959100 | 3.45238000  |
| H | -4.76530200 | 0.78493600  | 2.73402000  |
| H | -4.25775000 | 2.24119100  | 0.77715700  |
| H | -2.12880200 | 1.98032800  | -0.45181600 |

B3LYP/6-31G\*

Thermal correction to Gibbs Free Energy = 0.302732

Sum of electronic and thermal Free Energies = -1054.667585

M06-2X/6-311++G\*\*

Energy = -1054.8252957

No imaginary frequency

**in5**

|   |             |             |             |
|---|-------------|-------------|-------------|
| C | -3.92041100 | 2.40776500  | 0.51312900  |
| C | -4.30553800 | 3.74573800  | 0.53399800  |
| C | -3.93044500 | 4.60132700  | -0.50538900 |
| C | -3.16087100 | 4.11355200  | -1.56351600 |
| C | -2.76569400 | 2.77695600  | -1.58104500 |
| C | -3.14190200 | 1.90773700  | -0.54448600 |
| C | -2.65936200 | 0.49859700  | -0.52905000 |
| C | -1.33405300 | 0.28363100  | -0.85344200 |
| C | -0.64943700 | -0.93761600 | -1.16323900 |
| O | -1.39508400 | -2.00174000 | -1.43961000 |
| O | 0.60267700  | -1.04018200 | -1.26090800 |
| C | -0.70704000 | -3.24149300 | -1.70731100 |
| H | -4.20289400 | 1.74920100  | 1.32799200  |
| H | -4.89437200 | 4.12328500  | 1.36512900  |
| H | -4.23624800 | 5.64374200  | -0.48949900 |

|    |             |             |             |
|----|-------------|-------------|-------------|
| H  | -2.87010300 | 4.77247700  | -2.37672700 |
| H  | -2.17631200 | 2.39405800  | -2.40920100 |
| H  | -1.49916500 | -3.97242100 | -1.86386800 |
| H  | -0.08203500 | -3.14406700 | -2.59752400 |
| H  | -0.08912600 | -3.52091100 | -0.85142500 |
| S  | 4.41280400  | 0.32015100  | -1.93532100 |
| O  | 3.27337400  | -0.64846300 | -2.22274500 |
| C  | 2.76922000  | 1.36932500  | 2.96883700  |
| S  | 1.60785700  | 0.21781500  | 2.07792000  |
| O  | 2.40420200  | -0.96981000 | 1.70249000  |
| O  | 1.28803900  | 1.01199100  | 0.79585400  |
| F  | 3.86076800  | 1.58112900  | 2.23285200  |
| F  | 2.16068600  | 2.53409200  | 3.20298000  |
| F  | 3.12268400  | 0.81499300  | 4.13192200  |
| Cu | 2.11567300  | 0.06191600  | -0.69543600 |
| O  | 5.02894500  | 1.00449100  | -3.05736700 |
| C  | 5.72822300  | -0.73625600 | -1.14137300 |
| F  | 6.18360200  | -1.61054900 | -2.03824800 |
| F  | 6.72554800  | 0.04279600  | -0.72778300 |
| F  | 5.20658700  | -1.38850000 | -0.10433900 |
| O  | 3.85235900  | 1.15877400  | -0.79777100 |
| O  | 0.45352000  | 0.06249300  | 2.96327200  |
| C  | -5.95156500 | -0.57159400 | 0.45397500  |
| C  | -7.28532700 | -0.48973000 | 0.06026900  |
| C  | -7.61619400 | -0.21446200 | -1.26990800 |
| C  | -6.60037800 | -0.03165800 | -2.20905000 |
| C  | -5.26199000 | -0.12561300 | -1.82590300 |
| C  | -4.93289400 | -0.38237400 | -0.49000400 |
| N  | -3.55385000 | -0.46988400 | -0.10028400 |
| C  | -3.15185800 | -1.58609600 | 0.71087200  |
| C  | -2.25208400 | -1.39332600 | 1.76607500  |
| C  | -1.87314400 | -2.47455200 | 2.56048500  |
| C  | -2.40770100 | -3.74496800 | 2.33033400  |
| C  | -3.32004300 | -3.92929700 | 1.28879800  |
| C  | -3.68660400 | -2.85883900 | 0.47298500  |
| H  | -5.69414600 | -0.77907100 | 1.48779300  |
| H  | -8.06938800 | -0.63292900 | 0.79859600  |
| H  | -8.65769500 | -0.14810300 | -1.57086800 |
| H  | -6.84595900 | 0.17170400  | -3.24758800 |
| H  | -4.46964300 | -0.00839300 | -2.55857800 |
| H  | -0.69316900 | 1.15473300  | -0.85932600 |
| H  | -1.82675900 | -0.41544900 | 1.96263600  |
| H  | -1.16040200 | -2.30660700 | 3.36177000  |
| H  | -2.11758200 | -4.58260700 | 2.95817800  |
| H  | -3.74283600 | -4.91246000 | 1.09972700  |

H -4.38087800 -3.00663500 -0.34754500

B3LYP/6-31G\* (Lan12DZ for Cu)

Thermal correction to Gibbs Free Energy = 0.332679

Sum of electronic and thermal Free Energies = -3173.655642

M06-2X/6-311++G\*\* (Lan12DZ for Cu)

Energy = -3173.9159389

No imaginary frequency

**ts3**

|    |             |             |             |
|----|-------------|-------------|-------------|
| C  | 3.42676700  | 2.30841400  | 0.34347400  |
| C  | 4.03687800  | 3.47646900  | 0.79786500  |
| C  | 4.42251200  | 3.59812400  | 2.13533300  |
| C  | 4.18761100  | 2.54733500  | 3.02315200  |
| C  | 3.57716500  | 1.37628100  | 2.57221000  |
| C  | 3.19598900  | 1.24512500  | 1.22948400  |
| C  | 2.49718100  | 0.01080700  | 0.77590500  |
| C  | 1.34109900  | -0.38004800 | 1.33294700  |
| C  | 0.53785200  | -1.60628700 | 0.94490900  |
| O  | 1.06936600  | -2.67625000 | 1.66419900  |
| O  | -0.77313200 | -1.52485900 | 1.00084600  |
| C  | 0.20930400  | -3.79604000 | 1.88173900  |
| H  | 3.08417000  | 2.23497700  | -0.68281700 |
| H  | 4.19736600  | 4.30019300  | 0.10783400  |
| H  | 4.89670800  | 4.51128500  | 2.48474200  |
| H  | 4.47986900  | 2.63610400  | 4.06593200  |
| H  | 3.39673000  | 0.55419800  | 3.25963000  |
| H  | 0.79290200  | -4.50069200 | 2.47757000  |
| H  | -0.70038300 | -3.50451300 | 2.41204100  |
| H  | -0.06913700 | -4.26308400 | 0.92784100  |
| S  | -4.66088300 | -0.42888100 | 1.19695500  |
| O  | -3.59922900 | -1.51144300 | 1.21998600  |
| C  | -1.90569400 | 3.02649400  | -1.52764100 |
| S  | -0.74866500 | 1.64906100  | -1.04496500 |
| O  | -1.22262300 | 0.45017100  | -1.77378700 |
| O  | -1.02967200 | 1.48337900  | 0.45371800  |
| F  | -3.17066600 | 2.65584000  | -1.32361800 |
| F  | -1.64233200 | 4.11826600  | -0.80734600 |
| F  | -1.73366800 | 3.30297500  | -2.82441800 |
| Cu | -2.06441600 | -0.14679700 | 0.82375400  |
| O  | -5.67857400 | -0.43310300 | 2.23330500  |
| C  | -5.53572300 | -0.67921600 | -0.42813000 |
| F  | -6.17797900 | -1.84793600 | -0.40863200 |
| F  | -6.40994100 | 0.30664300  | -0.62178000 |
| F  | -4.64000900 | -0.68249700 | -1.41839100 |
| O  | -3.85115500 | 0.84096200  | 0.99137900  |

|   |             |             |             |
|---|-------------|-------------|-------------|
| O | 0.59916300  | 2.14247800  | -1.33216600 |
| C | 5.04468600  | -0.11897600 | -1.65283700 |
| C | 6.42332500  | -0.02122300 | -1.84464600 |
| C | 7.30224400  | -0.43793700 | -0.84229800 |
| C | 6.80134900  | -0.95852900 | 0.35313000  |
| C | 5.42411900  | -1.06666400 | 0.54950700  |
| C | 4.55173500  | -0.64171200 | -0.45490700 |
| N | 3.12170700  | -0.75662800 | -0.26935300 |
| C | 2.44492500  | -1.76546600 | -0.88835400 |
| C | 0.99179400  | -1.79692400 | -0.76034000 |
| C | 0.28774400  | -2.89563000 | -1.39920200 |
| C | 0.95145100  | -3.89447300 | -2.05320700 |
| C | 2.36848700  | -3.82978000 | -2.14288100 |
| C | 3.10528200  | -2.80071100 | -1.59008900 |
| H | 4.34947600  | 0.21236300  | -2.41829600 |
| H | 6.80828800  | 0.38849400  | -2.77394800 |
| H | 8.37498500  | -0.35559400 | -0.99162700 |
| H | 7.48194000  | -1.28482600 | 1.13417200  |
| H | 5.02338800  | -1.47627100 | 1.47148800  |
| H | 0.93505600  | 0.19650500  | 2.15603500  |
| H | 0.54065100  | -0.83758100 | -1.04043800 |
| H | -0.79542600 | -2.88423700 | -1.32609500 |
| H | 0.41841600  | -4.72199600 | -2.51018300 |
| H | 2.89976500  | -4.62454300 | -2.66078700 |
| H | 4.18382300  | -2.79704100 | -1.68123100 |

B3LYP/6-31G\* (Lanl2DZ for Cu)

Thermal correction to Gibbs Free Energy = 0.332497

Sum of electronic and thermal Free Energies = -3173.591476

M06-2X/6-311++G\*\* (Lanl2DZ for Cu)

Energy = -3173.8586611

Number of Imaginary Frequencies = 1

Lowest Frequency = 306.44i

**in6**

|   |             |             |             |
|---|-------------|-------------|-------------|
| C | 3.35825600  | -1.42070000 | 2.28107000  |
| C | 3.76718300  | -2.40053100 | 3.18374700  |
| C | 3.55184400  | -3.75161300 | 2.90051600  |
| C | 2.92112100  | -4.11821600 | 1.71074900  |
| C | 2.51163900  | -3.13946900 | 0.80480300  |
| C | 2.72664500  | -1.78097700 | 1.08013800  |
| C | 2.21488000  | -0.74550100 | 0.14344900  |
| C | 0.94063100  | -0.73980400 | -0.28145000 |
| C | 0.34314600  | 0.32145500  | -1.18978100 |
| O | 0.61598500  | -0.11915600 | -2.50568800 |
| O | -0.93630500 | 0.63501200  | -0.96250600 |

|    |             |             |             |
|----|-------------|-------------|-------------|
| C  | -0.25481100 | 0.35352600  | -3.52806700 |
| H  | 3.50604700  | -0.37157500 | 2.51947600  |
| H  | 4.24389200  | -2.10776500 | 4.11502200  |
| H  | 3.86994500  | -4.51348500 | 3.60662700  |
| H  | 2.74747500  | -5.16633700 | 1.48421800  |
| H  | 2.02632900  | -3.42551700 | -0.12402900 |
| H  | 0.09682200  | -0.10869600 | -4.45328300 |
| H  | -1.29246400 | 0.06932000  | -3.33500200 |
| H  | -0.19707600 | 1.44751800  | -3.62451600 |
| S  | -3.27242900 | -2.60974300 | 0.03790000  |
| O  | -2.01484300 | -2.11585200 | -0.66410100 |
| C  | -2.50939200 | 3.66510400  | 0.94930900  |
| S  | -1.73518000 | 2.35653300  | 2.02330200  |
| O  | -0.31022500 | 2.34802000  | 1.64600500  |
| O  | -2.49497100 | 1.11255800  | 1.55929500  |
| F  | -2.39662300 | 3.33589200  | -0.35410600 |
| F  | -3.80375400 | 3.80336500  | 1.23605700  |
| F  | -1.88963000 | 4.83529100  | 1.14021900  |
| Cu | -2.12061200 | -0.23390400 | 0.21931400  |
| O  | -3.26623000 | -3.96269100 | 0.56657300  |
| C  | -4.56474200 | -2.54813700 | -1.30115900 |
| F  | -4.26847700 | -3.43367300 | -2.25251100 |
| F  | -5.76020500 | -2.82835600 | -0.78691600 |
| F  | -4.58720300 | -1.31977500 | -1.83356700 |
| O  | -3.63516400 | -1.46736300 | 0.95917900  |
| O  | -2.08061100 | 2.72181200  | 3.39231400  |
| C  | 5.46648800  | 0.59767700  | 0.42336700  |
| C  | 6.82061100  | 0.27031300  | 0.34000600  |
| C  | 7.24781200  | -0.73180700 | -0.53416900 |
| C  | 6.31978000  | -1.40458700 | -1.33223700 |
| C  | 4.96514300  | -1.07821800 | -1.26092800 |
| C  | 4.54630700  | -0.08031400 | -0.37872500 |
| N  | 3.13950000  | 0.26186000  | -0.31177000 |
| C  | 2.68846400  | 1.38493000  | -0.92322600 |
| C  | 1.24410300  | 1.66828300  | -0.85688700 |
| C  | 0.77784900  | 2.87576500  | -1.54761000 |
| C  | 1.62950000  | 3.69354700  | -2.22538800 |
| C  | 3.01529600  | 3.36461900  | -2.26727700 |
| C  | 3.54345500  | 2.25656000  | -1.63854600 |
| H  | 5.12191400  | 1.36924500  | 1.10551500  |
| H  | 7.53854600  | 0.79430500  | 0.96409500  |
| H  | 8.30158400  | -0.98824500 | -0.59262200 |
| H  | 6.64866100  | -2.18236000 | -2.01512900 |
| H  | 4.23440200  | -1.58801500 | -1.88119400 |
| H  | 0.28700000  | -1.55930500 | -0.00219700 |

|   |             |            |             |
|---|-------------|------------|-------------|
| H | 0.92573900  | 1.76303000 | 0.20098700  |
| H | -0.28015000 | 3.09307900 | -1.45495000 |
| H | 1.27440200  | 4.58854700 | -2.72598400 |
| H | 3.69091200  | 4.01274900 | -2.82024100 |
| H | 4.60368900  | 2.05021700 | -1.70513300 |

B3LYP/6-31G\* (Lanl2DZ for Cu)

Thermal correction to Gibbs Free Energy = 0.333819

Sum of electronic and thermal Free Energies = -3173.588539

M06-2X/6-311++G\*\* (Lanl2DZ for Cu)

Energy = -3173.86105390

No imaginary frequency

**ts4-OTf**

|    |             |             |             |
|----|-------------|-------------|-------------|
| C  | 3.06646000  | -2.56184200 | -0.22758800 |
| C  | 3.66753000  | -3.79858600 | -0.46244000 |
| C  | 4.21879800  | -4.08917800 | -1.71265000 |
| C  | 4.16030500  | -3.14003000 | -2.73425600 |
| C  | 3.55655000  | -1.90266400 | -2.50416400 |
| C  | 3.01231000  | -1.60076200 | -1.24799700 |
| C  | 2.32114900  | -0.29086300 | -1.04493700 |
| C  | 1.10437200  | -0.07100900 | -1.57406500 |
| C  | 0.38232000  | 1.24694800  | -1.51660900 |
| O  | 0.71462900  | 1.85738300  | -2.77440300 |
| O  | -0.98049600 | 1.14929800  | -1.37920000 |
| C  | -0.10548300 | 2.92729700  | -3.22641300 |
| H  | 2.61768400  | -2.34827900 | 0.73747100  |
| H  | 3.69600900  | -4.54016700 | 0.33126200  |
| H  | 4.68433100  | -5.05467000 | -1.89176400 |
| H  | 4.57802800  | -3.36281200 | -3.71236800 |
| H  | 3.49876800  | -1.16530700 | -3.30019000 |
| H  | 0.23321900  | 3.15219700  | -4.24124700 |
| H  | -1.16281200 | 2.64872200  | -3.24254200 |
| H  | 0.02441900  | 3.82871500  | -2.60789500 |
| S  | -4.56128100 | -0.78978100 | -1.26960400 |
| O  | -3.74260600 | 0.30230900  | -1.91756500 |
| C  | -1.58248200 | -0.75371000 | 3.13014100  |
| S  | -0.24124800 | -0.62292100 | 1.83856600  |
| O  | -0.08619800 | 0.89860800  | 1.75733500  |
| O  | -0.86483400 | -1.18396700 | 0.59759500  |
| F  | -2.67686800 | -0.13380900 | 2.68507800  |
| F  | -1.84744800 | -2.03891800 | 3.34110500  |
| F  | -1.17154800 | -0.18453400 | 4.26062100  |
| Cu | -2.02322800 | -0.24197200 | -0.76690200 |
| O  | -5.45383000 | -1.58478700 | -2.09465900 |
| C  | -5.61682800 | 0.10701400  | -0.02501200 |

|   |             |             |             |
|---|-------------|-------------|-------------|
| F | -6.46616400 | 0.91781400  | -0.65412800 |
| F | -6.29834400 | -0.77166200 | 0.70847500  |
| F | -4.82678400 | 0.83309800  | 0.77866600  |
| O | -3.55037400 | -1.52671900 | -0.40117700 |
| O | 0.93150400  | -1.33769400 | 2.32845100  |
| C | 4.51688300  | 0.03091900  | 1.51117200  |
| C | 5.81058200  | -0.18140800 | 1.98907700  |
| C | 6.91157400  | 0.04155400  | 1.15838800  |
| C | 6.71959400  | 0.47908100  | -0.15378700 |
| C | 5.42843400  | 0.69823400  | -0.63728500 |
| C | 4.33282300  | 0.47008800  | 0.19719800  |
| N | 2.99441700  | 0.71263400  | -0.29397800 |
| C | 2.36880500  | 1.90218500  | 0.00266200  |
| C | 0.98269300  | 2.08429600  | -0.35689500 |
| C | 0.35693000  | 3.33475200  | -0.03333100 |
| C | 1.01204500  | 4.30852400  | 0.68526700  |
| C | 2.35596500  | 4.09021300  | 1.05280700  |
| C | 3.02337900  | 2.92104700  | 0.73313600  |
| H | 3.65060200  | -0.14907200 | 2.14113600  |
| H | 5.95649500  | -0.52636800 | 3.00868400  |
| H | 7.91733700  | -0.12740700 | 1.53265900  |
| H | 7.57341200  | 0.65217000  | -0.80256400 |
| H | 5.26434900  | 1.04193200  | -1.65393700 |
| H | 0.63782500  | -0.85396300 | -2.16224800 |
| H | 0.42758200  | 1.40880700  | 0.74623900  |
| H | -0.68305300 | 3.44675200  | -0.32198400 |
| H | 0.51153000  | 5.23177200  | 0.95881600  |
| H | 2.88760500  | 4.85479100  | 1.61340600  |
| H | 4.05363500  | 2.78822800  | 1.03780900  |

B3LYP/6-31G\* (Lanl2DZ for Cu)

Thermal correction to Gibbs Free Energy = 0.329632

Sum of electronic and thermal Free Energies = -3173.582202

M06-2X/6-311++G\*\* (Lanl2DZ for Cu)

Energy = -3173.8490022

Number of Imaginary Frequencies = 1

Lowest Frequency = 1178.14i

#### in7-OTf

|   |            |             |            |
|---|------------|-------------|------------|
| C | 0.48225300 | 0.87515900  | 2.36025200 |
| C | 0.11597400 | 1.42611000  | 3.58779400 |
| C | 0.29417900 | 0.70011200  | 4.76709100 |
| C | 0.83460700 | -0.58552400 | 4.71619800 |
| C | 1.19326900 | -1.14510100 | 3.48947200 |
| C | 1.02639300 | -0.41501300 | 2.30380100 |
| C | 1.36542400 | -1.07629700 | 1.00660800 |



|    |             |             |             |
|----|-------------|-------------|-------------|
| C  | 0.55203400  | -2.10063200 | 0.53492800  |
| C  | 0.81338200  | -2.83367400 | -0.76150200 |
| O  | 0.70982200  | -4.23915700 | -0.64303500 |
| O  | -0.15174400 | -2.30258800 | -1.62714700 |
| C  | -0.60196300 | -4.76717900 | -0.46166900 |
| H  | 0.33015400  | 1.44057900  | 1.44801200  |
| H  | -0.31981800 | 2.42037000  | 3.61944000  |
| H  | 0.00326900  | 1.13163800  | 5.72059500  |
| H  | 0.96842500  | -1.15958100 | 5.62870300  |
| H  | 1.60016000  | -2.15189100 | 3.44808900  |
| H  | -0.47725100 | -5.85138200 | -0.41394500 |
| H  | -1.06223700 | -4.42653100 | 0.47614400  |
| H  | -1.25794300 | -4.50534000 | -1.29644600 |
| S  | -3.25621600 | -0.31945600 | 1.18732600  |
| O  | -2.72263100 | -1.56378400 | 1.74529100  |
| C  | -0.17544600 | 3.74442000  | -1.25151000 |
| S  | -1.03062300 | 2.34230200  | -2.13515700 |
| O  | -1.20338700 | 2.74605700  | -3.51478900 |
| O  | -2.42487800 | 2.34665800  | -1.38563300 |
| F  | -0.80804500 | 4.88683100  | -1.48355700 |
| F  | -0.15547000 | 3.50125400  | 0.06295000  |
| F  | 1.08283900  | 3.82729800  | -1.70002100 |
| Cu | -0.96963000 | -0.93441500 | -0.70248700 |
| O  | -3.80695300 | 0.71787400  | 2.04876300  |
| C  | -4.61210900 | -0.82704200 | 0.01730900  |
| F  | -5.60076300 | -1.41621400 | 0.68664400  |
| F  | -5.08404000 | 0.24647200  | -0.62347200 |
| F  | -4.11857300 | -1.68781700 | -0.88836100 |
| O  | -2.24600400 | 0.28079100  | 0.15558900  |
| O  | -0.26982400 | 1.13144200  | -1.78059100 |
| C  | 2.99283400  | 1.66688700  | 0.03843000  |
| C  | 3.69316300  | 2.81679600  | 0.40353700  |
| C  | 4.62784600  | 2.76807000  | 1.44072300  |
| C  | 4.86403600  | 1.56711000  | 2.11372600  |
| C  | 4.16620200  | 0.41207000  | 1.75600800  |
| C  | 3.22877900  | 0.47407200  | 0.72463500  |
| N  | 2.49414600  | -0.71052900 | 0.32900100  |
| C  | 2.95913300  | -1.45947700 | -0.79096200 |
| C  | 2.20662000  | -2.54107900 | -1.28362500 |
| C  | 2.71785800  | -3.29762700 | -2.34113100 |
| C  | 3.94703800  | -2.99139600 | -2.91710200 |
| C  | 4.68676800  | -1.91023600 | -2.42867600 |
| C  | 4.20285300  | -1.14835000 | -1.37233600 |
| H  | 2.26686400  | 1.68535900  | -0.76742100 |
| H  | 3.50036300  | 3.74756300  | -0.12160100 |

|   |             |             |             |
|---|-------------|-------------|-------------|
| H | 5.17177100  | 3.66450600  | 1.72445500  |
| H | 5.59092500  | 1.52665300  | 2.91968300  |
| H | 4.33918300  | -0.52650800 | 2.27280300  |
| H | -0.24274100 | -2.45390200 | 1.18467600  |
| H | -2.45881100 | 1.59426000  | -0.69315700 |
| H | 2.12766500  | -4.13257600 | -2.70136200 |
| H | 4.32588400  | -3.58701100 | -3.74245100 |
| H | 5.64822200  | -1.65941400 | -2.86736400 |
| H | 4.79007000  | -0.32240700 | -0.99165800 |

B3LYP/6-31G\* (LanL2DZ for Cu)

Thermal correction to Gibbs Free Energy = 0.333477

Sum of electronic and thermal Free Energies = -3173.620460

M06-2X/6-311++G\*\* (LanL2DZ for Cu)

Energy = -3173.8835868

No imaginary frequency

### in8-OTf

|   |             |             |             |
|---|-------------|-------------|-------------|
| C | 1.00332700  | 1.96182600  | -2.13941200 |
| C | 0.99481300  | 3.02135700  | -3.04723300 |
| C | -0.12716400 | 3.84391700  | -3.15694100 |
| C | -1.24607900 | 3.60403900  | -2.35570500 |
| C | -1.24244500 | 2.55671600  | -1.43659800 |
| C | -0.11081200 | 1.73322600  | -1.31780000 |
| C | -0.12895600 | 0.56081700  | -0.39755200 |
| C | -0.10089500 | -0.72498400 | -0.94624700 |
| C | -0.27892300 | -1.98346600 | -0.14368600 |
| O | -1.50979800 | -2.70320400 | -0.47532000 |
| O | 0.81401200  | -2.77146100 | -0.44983100 |
| C | -1.60065400 | -3.25768500 | -1.79988500 |
| H | 1.87940800  | 1.32676000  | -2.06205700 |
| H | 1.86992800  | 3.20016500  | -3.66515300 |
| H | -0.13284300 | 4.66554600  | -3.86791300 |
| H | -2.12941800 | 4.22934900  | -2.44918300 |
| H | -2.12285800 | 2.35932600  | -0.83514600 |
| H | -2.41126700 | -3.98836400 | -1.76494200 |
| H | -1.84373200 | -2.48227300 | -2.53390700 |
| H | -0.66199200 | -3.75377300 | -2.04996200 |
| S | 4.28001500  | 0.26134300  | -0.47390800 |
| O | 3.53620000  | -0.48997700 | -1.59530500 |
| C | -5.89894900 | -0.67629700 | -0.52163500 |
| S | -4.07627700 | -0.31849200 | -0.38846400 |
| O | -3.65088800 | -1.60074700 | 0.44208100  |
| O | -3.94813600 | 0.88741200  | 0.42452700  |
| F | -6.43066400 | -0.78856000 | 0.69305100  |
| F | -6.47421200 | 0.33566600  | -1.17174100 |

|    |             |             |             |
|----|-------------|-------------|-------------|
| F  | -6.08658800 | -1.80653600 | -1.20150200 |
| Cu | 2.07100900  | -1.53879700 | -0.98703100 |
| O  | 5.06274900  | 1.38373600  | -0.97624600 |
| C  | 5.48998400  | -1.04525500 | 0.06722300  |
| F  | 6.34064900  | -1.33607900 | -0.91726000 |
| F  | 6.17293100  | -0.62629000 | 1.13300400  |
| F  | 4.81212000  | -2.16217500 | 0.39724400  |
| O  | 3.39209900  | 0.45597400  | 0.69054800  |
| O  | -3.50896900 | -0.36313100 | -1.73439800 |
| C  | 1.08178600  | 2.68686900  | 1.66332800  |
| C  | 1.13919600  | 3.96253000  | 2.22911200  |
| C  | -0.02935000 | 4.60439000  | 2.64432600  |
| C  | -1.26702700 | 3.97239400  | 2.49661300  |
| C  | -1.34243800 | 2.69934800  | 1.93022100  |
| C  | -0.16396400 | 2.07656000  | 1.51388600  |
| N  | -0.22959600 | 0.73810800  | 0.94468500  |
| C  | -0.31630400 | -0.37022100 | 1.83503400  |
| C  | -0.38010400 | -1.68494500 | 1.33777800  |
| C  | -0.47272400 | -2.75414500 | 2.23295200  |
| C  | -0.49959800 | -2.53804800 | 3.60653200  |
| C  | -0.42370700 | -1.23097100 | 4.09793800  |
| C  | -0.33022000 | -0.15394800 | 3.22633000  |
| H  | 1.98214200  | 2.16687000  | 1.34939400  |
| H  | 2.10275900  | 4.44971900  | 2.34613300  |
| H  | 0.02345400  | 5.59638700  | 3.08420500  |
| H  | -2.17752500 | 4.46993700  | 2.81789300  |
| H  | -2.29588200 | 2.19652300  | 1.79954900  |
| H  | -0.20772400 | -0.80448000 | -2.02273100 |
| H  | -2.80606400 | -2.04247900 | 0.04223900  |
| H  | -0.51156200 | -3.75993500 | 1.82833400  |
| H  | -0.56893400 | -3.37879100 | 4.29016100  |
| H  | -0.43286200 | -1.04671900 | 5.16804600  |
| H  | -0.26594500 | 0.85176400  | 3.61903400  |

B3LYP/6-31G\* (Lanl2DZ for Cu)

Thermal correction to Gibbs Free Energy = 0.332510

Sum of electronic and thermal Free Energies = -3173.622892

M06-2X/6-311++G\*\* (Lanl2DZ for Cu)

Energy = -3173.8832222

No imaginary frequency

#### ts5-OTf

|   |             |            |             |
|---|-------------|------------|-------------|
| C | 0.91539500  | 1.98000700 | -2.13083600 |
| C | 0.88365600  | 3.03398200 | -3.04401500 |
| C | -0.26053400 | 3.82443800 | -3.16335000 |
| C | -1.37721800 | 3.55784500 | -2.36767300 |

|    |             |             |             |
|----|-------------|-------------|-------------|
| C  | -1.35241900 | 2.51634800  | -1.44199400 |
| C  | -0.19738200 | 1.72766800  | -1.31398800 |
| C  | -0.18033300 | 0.56351300  | -0.38544900 |
| C  | -0.12113300 | -0.72661400 | -0.92707900 |
| C  | -0.21467800 | -1.97253000 | -0.10792400 |
| O  | -1.51160900 | -2.74754900 | -0.40053000 |
| O  | 0.81630300  | -2.78182800 | -0.47472800 |
| C  | -1.69122000 | -3.27472200 | -1.74200000 |
| H  | 1.80717100  | 1.36846600  | -2.04494000 |
| H  | 1.75670900  | 3.23353400  | -3.65844200 |
| H  | -0.28499900 | 4.64151700  | -3.87917900 |
| H  | -2.27755500 | 4.15655200  | -2.47151500 |
| H  | -2.23181500 | 2.29077000  | -0.84923400 |
| H  | -2.43906700 | -4.06420100 | -1.65626600 |
| H  | -2.04570800 | -2.48632400 | -2.40946500 |
| H  | -0.73554200 | -3.68865200 | -2.05950700 |
| S  | 4.22081400  | 0.30969100  | -0.51762600 |
| O  | 3.51415200  | -0.47109400 | -1.64517200 |
| C  | -5.75265800 | -0.73530100 | -0.50431100 |
| S  | -3.93234700 | -0.38965000 | -0.37073900 |
| O  | -3.46168800 | -1.61202600 | 0.42911200  |
| O  | -3.82475600 | 0.85916600  | 0.39529100  |
| F  | -6.29898800 | -0.81753700 | 0.71039300  |
| F  | -6.33882400 | 0.25419200  | -1.18422700 |
| F  | -5.95085500 | -1.88737700 | -1.15383900 |
| Cu | 2.07157600  | -1.54259500 | -1.04046200 |
| O  | 5.00609300  | 1.42912100  | -1.02035600 |
| C  | 5.42625500  | -0.97613600 | 0.08166300  |
| F  | 6.30857400  | -1.27496800 | -0.87104300 |
| F  | 6.07072400  | -0.53476700 | 1.16140600  |
| F  | 4.74666600  | -2.09432300 | 0.40824600  |
| O  | 3.29694000  | 0.51583200  | 0.61648400  |
| O  | -3.40386900 | -0.40323000 | -1.74395200 |
| C  | 0.98868500  | 2.73329800  | 1.66599400  |
| C  | 1.00586500  | 4.01158400  | 2.22797100  |
| C  | -0.18353700 | 4.61851300  | 2.63711400  |
| C  | -1.40127600 | 3.94978100  | 2.48635800  |
| C  | -1.43857000 | 2.67281700  | 1.92425200  |
| C  | -0.23884800 | 2.08719200  | 1.51650300  |
| N  | -0.25940500 | 0.74192100  | 0.95488900  |
| C  | -0.28549400 | -0.36061200 | 1.85351900  |
| C  | -0.28868400 | -1.68283100 | 1.36970900  |
| C  | -0.30014500 | -2.74966400 | 2.27129000  |
| C  | -0.31345200 | -2.52279300 | 3.64354800  |
| C  | -0.30529100 | -1.20924800 | 4.12295800  |

|   |             |             |             |
|---|-------------|-------------|-------------|
| C | -0.28722800 | -0.13501600 | 3.24282600  |
| H | 1.90410900  | 2.23971200  | 1.35335700  |
| H | 1.95358900  | 4.52861500  | 2.34609000  |
| H | -0.16213600 | 5.61309900  | 3.07377000  |
| H | -2.32741700 | 4.42174300  | 2.80122800  |
| H | -2.37501300 | 2.14144100  | 1.78420200  |
| H | -0.25068200 | -0.82331500 | -1.99934400 |
| H | -2.43871300 | -2.19419000 | -0.03430200 |
| H | -0.29044800 | -3.75957400 | 1.87529900  |
| H | -0.32281200 | -3.35990400 | 4.33475600  |
| H | -0.30820500 | -1.01721300 | 5.19160900  |
| H | -0.27352500 | 0.87585300  | 3.62677700  |

B3LYP/6-31G\* (Lanl2DZ for Cu)

Thermal correction to Gibbs Free Energy = 0.332762

Sum of electronic and thermal Free Energies = -3173.618150

M06-2X/6-311++G\*\* (Lanl2DZ for Cu)

Energy = -3173.8864164

Number of Imaginary Frequencies = 1

Lowest Frequency = 40.14i

**in7**

|   |             |             |             |
|---|-------------|-------------|-------------|
| C | 4.39487100  | 1.62564500  | -1.68272700 |
| C | 4.95724900  | 2.84342300  | -2.06053700 |
| C | 4.60631900  | 4.01884400  | -1.39228500 |
| C | 3.67881900  | 3.97411100  | -0.35042500 |
| C | 3.10609900  | 2.75891900  | 0.02470300  |
| C | 3.46761500  | 1.57090500  | -0.63029300 |
| C | 2.77754700  | 0.30664900  | -0.25007800 |
| C | 1.39863000  | 0.26772500  | -0.29204100 |
| C | 0.66924500  | -0.89386000 | 0.06256600  |
| O | -0.60303800 | -0.97614000 | 0.08201900  |
| H | 4.66066800  | 0.72131300  | -2.21951300 |
| H | 5.66484600  | 2.87456700  | -2.88411300 |
| H | 5.04768400  | 4.96609200  | -1.68889800 |
| H | 3.39375000  | 4.88462000  | 0.16847500  |
| H | 2.37687000  | 2.72648600  | 0.82897700  |
| S | -2.48549800 | 2.75880200  | -0.12018600 |
| O | -1.29412100 | 1.92441600  | 0.34567200  |
| C | -4.61501200 | -1.89544300 | 0.15359400  |
| S | -3.43896000 | -2.44301500 | -1.18329700 |
| O | -2.44795600 | -3.26625200 | -0.48634300 |
| O | -2.89594000 | -1.07240500 | -1.63943100 |
| F | -3.95784700 | -1.07108300 | 1.01312800  |
| F | -5.64850000 | -1.22560400 | -0.35302900 |
| F | -5.06259900 | -2.94312700 | 0.84518900  |

|    |             |             |             |
|----|-------------|-------------|-------------|
| Cu | -1.98332900 | 0.20277300  | -0.53047600 |
| O  | -2.21117600 | 4.08422300  | -0.64614000 |
| C  | -3.49972600 | 2.97678800  | 1.42767000  |
| F  | -2.82018300 | 3.72242700  | 2.29915200  |
| F  | -4.64814300 | 3.57629400  | 1.12454300  |
| F  | -3.74676000 | 1.77953500  | 1.96441400  |
| O  | -3.27439200 | 1.78352000  | -0.96482300 |
| O  | -4.25792000 | -3.03967100 | -2.23260800 |
| C  | 5.79049300  | -1.29908500 | -0.62894300 |
| C  | 7.17224200  | -1.22828000 | -0.44765600 |
| C  | 7.70062100  | -0.56880000 | 0.66484400  |
| C  | 6.84564800  | 0.01530700  | 1.60163400  |
| C  | 5.46231800  | -0.05807200 | 1.43105500  |
| C  | 4.94301100  | -0.70717500 | 0.31035000  |
| N  | 3.50495200  | -0.79427200 | 0.13965900  |
| C  | 2.85580900  | -1.99359800 | 0.48417300  |
| C  | 1.44201800  | -2.06945300 | 0.42449000  |
| C  | 0.78508800  | -3.28296500 | 0.72384500  |
| C  | 1.51461400  | -4.39168900 | 1.10747900  |
| C  | 2.91456000  | -4.30204000 | 1.20634700  |
| C  | 3.58382800  | -3.12837000 | 0.90019300  |
| H  | 5.36767500  | -1.81024600 | -1.48895100 |
| H  | 7.83374600  | -1.68597900 | -1.17730300 |
| H  | 8.77652500  | -0.51236700 | 0.80198700  |
| H  | 7.25259800  | 0.52582200  | 2.46941100  |
| H  | 4.78828600  | 0.38774900  | 2.15578800  |
| H  | 0.86388500  | 1.15840700  | -0.59599600 |
| H  | -0.29536500 | -3.31377400 | 0.62357200  |
| H  | 1.01033500  | -5.32643300 | 1.33150400  |
| H  | 3.49084500  | -5.16736500 | 1.52178500  |
| H  | 4.66206500  | -3.08641600 | 0.98010100  |

B3LYP/6-31G\* (Lanl2DZ for Cu)

Thermal correction to Gibbs Free Energy = 0.283760

Sum of electronic and thermal Free Energies = -3057.992686

M06-2X/6-311++G\*\* (Lanl2DZ for Cu)

Energy = -3058.2180259

No imaginary frequency

HOTf-assisted reaction

**ts2-HOTf**

|   |             |             |            |
|---|-------------|-------------|------------|
| C | -2.06398700 | -1.63569200 | 2.49224900 |
| C | -2.06203200 | -1.64342400 | 3.88607100 |
| C | -1.67327400 | -0.50579000 | 4.59756700 |
| C | -1.27859400 | 0.64302900  | 3.91113600 |

|    |             |             |             |
|----|-------------|-------------|-------------|
| C  | -1.27013700 | 0.66064800  | 2.51698600  |
| C  | -1.66448000 | -0.47973100 | 1.79668100  |
| C  | -1.62414800 | -0.45018800 | 0.31626900  |
| C  | -0.49406200 | -0.42684800 | -0.43290700 |
| C  | -0.54433000 | -0.43319600 | -1.92873300 |
| O  | 0.66766400  | -0.54392200 | -2.44117200 |
| O  | -1.56747100 | -0.36557700 | -2.61634300 |
| C  | 0.77432000  | -0.58883900 | -3.87908700 |
| H  | -2.33867500 | -2.53332400 | 1.95085800  |
| H  | -2.35067500 | -2.54719600 | 4.41473100  |
| H  | -1.67006000 | -0.51940800 | 5.68385500  |
| H  | -0.97070100 | 1.53020000  | 4.45642600  |
| H  | -0.98551400 | 1.56423000  | 1.98720600  |
| H  | 1.83211400  | -0.75018200 | -4.07735500 |
| H  | 0.17438900  | -1.41452300 | -4.26629400 |
| H  | 0.43445500  | 0.35937500  | -4.30061000 |
| S  | -0.14349200 | 3.34113700  | -0.97101500 |
| O  | 0.63343900  | 2.09208400  | -1.43147100 |
| C  | 4.36346400  | -0.35396000 | 1.24010500  |
| S  | 3.13083500  | 0.95346100  | 1.74639200  |
| O  | 1.79816600  | 0.21057500  | 1.81957400  |
| O  | 2.96254200  | 1.81719000  | 0.51284700  |
| F  | 4.00900400  | -0.86162900 | 0.05825200  |
| F  | 5.56833400  | 0.20666000  | 1.13803100  |
| F  | 4.39052300  | -1.31551000 | 2.15642100  |
| Cu | 1.09981500  | 0.95248400  | 0.08713100  |
| O  | -1.24307400 | 3.67658800  | -1.87553300 |
| C  | 1.11717200  | 4.69753800  | -1.18370800 |
| F  | 1.55069500  | 4.71216300  | -2.44621300 |
| F  | 0.54004700  | 5.86925500  | -0.90164200 |
| F  | 2.14649200  | 4.50420900  | -0.36244100 |
| O  | -0.40377900 | 3.24202900  | 0.48041900  |
| O  | 3.62348600  | 1.56097100  | 2.96898400  |
| C  | -4.34008900 | 1.00961000  | 1.14437800  |
| C  | -4.99310200 | 2.21727400  | 1.38572900  |
| C  | -5.00619800 | 3.22212300  | 0.41411300  |
| C  | -4.36341100 | 3.02235700  | -0.80651700 |
| C  | -3.71594900 | 1.81387600  | -1.06941000 |
| C  | -3.71827900 | 0.82025900  | -0.09265200 |
| N  | -2.97966800 | -0.43298800 | -0.40339100 |
| C  | -3.74484800 | -1.72683500 | -0.33644000 |
| C  | -3.04084500 | -2.89189000 | -0.64524800 |
| C  | -3.72414900 | -4.10812900 | -0.66256500 |
| C  | -5.09322600 | -4.15569200 | -0.39288900 |
| C  | -5.78367900 | -2.97631200 | -0.11574700 |

|   |             |             |             |
|---|-------------|-------------|-------------|
| C | -5.11539100 | -1.74893100 | -0.09005600 |
| H | -4.31687800 | 0.23647300  | 1.90266900  |
| H | -5.48303800 | 2.37431200  | 2.34187000  |
| H | -5.50669800 | 4.16431700  | 0.61663200  |
| H | -4.33898200 | 3.80693200  | -1.55488000 |
| H | -3.19217200 | 1.67097200  | -2.00847500 |
| H | -2.67724800 | -0.35782800 | -1.41624400 |
| H | -1.98055100 | -2.87988100 | -0.87900400 |
| H | -3.17219900 | -5.01338800 | -0.89542100 |
| H | -5.62024800 | -5.10506900 | -0.40786700 |
| H | -6.85163400 | -2.99903800 | 0.07973200  |
| H | -5.66632900 | -0.83929900 | 0.10837900  |
| S | 1.05576400  | -3.53864300 | -0.45390200 |
| O | 1.20808500  | -2.23161200 | 0.35754800  |
| O | 1.03658400  | -4.72083000 | 0.39968900  |
| C | 2.67867600  | -3.58831400 | -1.36415300 |
| F | 3.68880400  | -3.68994700 | -0.49928600 |
| F | 2.69245100  | -4.64277200 | -2.18460300 |
| F | 2.84169800  | -2.47351600 | -2.09179800 |
| O | 0.02522500  | -3.39939900 | -1.50152900 |
| H | 0.45806100  | -1.27675200 | 0.02550600  |

B3LYP/6-31G\* (Lanl2DZ for Cu)

Thermal correction to Gibbs Free Energy = 0.358363

Sum of electronic and thermal Free Energies = -4135.564505

M06-2X/6-311++G\*\* (Lanl2DZ for Cu)

Energy = -4135.8790456

Number of Imaginary Frequencies = 1

Lowest Frequency = 1103.89i

### in3-HOTf

|   |             |             |             |
|---|-------------|-------------|-------------|
| C | 1.55192200  | -2.38336600 | -0.88423300 |
| C | 2.03647600  | -3.46660400 | -1.61626400 |
| C | 2.48207400  | -3.29504200 | -2.92819900 |
| C | 2.43536600  | -2.03002000 | -3.51553900 |
| C | 1.95486300  | -0.94229400 | -2.78940000 |
| C | 1.51337200  | -1.10247600 | -1.46362800 |
| C | 0.97479800  | 0.08957000  | -0.76856100 |
| C | -0.03617400 | 0.82757900  | -1.25234200 |
| C | -0.57600400 | 2.04854600  | -0.60552100 |
| O | -1.53600600 | 2.60059200  | -1.32047100 |
| O | -0.12637000 | 2.52580800  | 0.44351900  |
| C | -2.33801100 | 3.60584700  | -0.66391600 |
| H | 1.16767300  | -2.54393300 | 0.11526300  |
| H | 2.04451000  | -4.45350000 | -1.16276900 |
| H | 2.85313500  | -4.14556700 | -3.49314300 |



|   |             |             |             |
|---|-------------|-------------|-------------|
| H | 2.77249200  | -1.88726500 | -4.53823700 |
| H | 1.92775700  | 0.04486500  | -3.24105000 |
| H | -2.98350300 | 4.00868400  | -1.44325700 |
| H | -2.92479700 | 3.11039000  | 0.11164000  |
| H | -1.70473000 | 4.38527500  | -0.23554800 |
| C | 4.00824200  | 0.39920300  | -0.16966800 |
| C | 5.24935300  | 1.01780400  | -0.32567100 |
| C | 5.42434600  | 2.35612600  | 0.03116100  |
| C | 4.35235100  | 3.08388500  | 0.54809000  |
| C | 3.10464900  | 2.47994400  | 0.70940200  |
| C | 2.94621700  | 1.14137200  | 0.34967800  |
| N | 1.59832800  | 0.54422200  | 0.53480700  |
| C | 1.44261500  | -0.44395800 | 1.66068500  |
| C | 0.13370600  | -0.79950900 | 1.98183800  |
| C | -0.07509300 | -1.72428700 | 3.00495000  |
| C | 1.00806000  | -2.25778000 | 3.70656900  |
| C | 2.30768500  | -1.86274700 | 3.38599700  |
| C | 2.53888800  | -0.95002800 | 2.35311200  |
| H | 3.87591600  | -0.63955400 | -0.44478700 |
| H | 6.08029700  | 0.44603500  | -0.72781800 |
| H | 6.39376900  | 2.82946800  | -0.09377800 |
| H | 4.47978800  | 4.12568100  | 0.82614500  |
| H | 2.26442300  | 3.04624900  | 1.09743500  |
| H | 0.96739900  | 1.36341900  | 0.78640800  |
| H | -0.72142100 | -0.37850800 | 1.45488900  |
| H | -1.09503200 | -2.02013900 | 3.22909900  |
| H | 0.84107300  | -2.97706500 | 4.50324300  |
| H | 3.15416900  | -2.26523900 | 3.93481600  |
| H | 3.55035200  | -0.64858800 | 2.11190800  |
| S | -3.04634100 | -0.58040500 | -0.05243800 |
| O | -2.75163400 | -0.72276100 | -1.49432500 |
| O | -3.01458000 | -1.81490600 | 0.75548900  |
| C | -4.81987200 | -0.01833500 | -0.00568200 |
| F | -5.61994700 | -0.88458500 | -0.64250200 |
| F | -5.25342600 | 0.10496800  | 1.25876700  |
| F | -4.94427100 | 1.18486600  | -0.60390800 |
| O | -2.34413300 | 0.57530700  | 0.59879900  |
| H | -0.56848600 | 0.47608000  | -2.12754900 |

B3LYP/6-31G\*

Thermal correction to Gibbs Free Energy = 0.332183

Sum of electronic and thermal Free Energies = -2016.629967

M06-2X/6-311++G\*\*

Energy = -2016.8393433

No imaginary frequency

**in4-HOTf**

|   |             |             |             |
|---|-------------|-------------|-------------|
| C | 3.78139300  | -0.27321600 | 0.52907300  |
| C | 4.92759100  | -0.98618900 | 0.87464400  |
| C | 4.94746400  | -1.77745800 | 2.02454300  |
| C | 3.80984000  | -1.85331500 | 2.82853300  |
| C | 2.66212900  | -1.14051500 | 2.48625900  |
| C | 2.63221300  | -0.33396600 | 1.33545100  |
| C | 1.40960600  | 0.46386800  | 1.05901900  |
| C | 0.80520400  | 1.17114300  | 2.02683500  |
| C | -0.43331000 | 1.99604700  | 1.91750900  |
| O | -1.09498300 | 1.97537600  | 3.08107200  |
| O | -0.76468300 | 2.62923800  | 0.93708200  |
| C | -2.38034600 | 2.64168000  | 3.06654600  |
| H | 3.79036800  | 0.33922500  | -0.36529400 |
| H | 5.80873000  | -0.91972400 | 0.24275100  |
| H | 5.84171000  | -2.33512700 | 2.28800400  |
| H | 3.80918200  | -2.47512200 | 3.71923500  |
| H | 1.77058000  | -1.22228400 | 3.10069300  |
| H | -2.77356800 | 2.51854200  | 4.07562200  |
| H | -2.25104700 | 3.70031300  | 2.82772000  |
| H | -3.02994800 | 2.16665000  | 2.32761000  |
| C | 1.91203600  | -0.87427300 | -2.16909500 |
| C | 2.16835900  | -2.07912700 | -2.82537300 |
| C | 1.60348100  | -3.26833900 | -2.36457100 |
| C | 0.77342200  | -3.25201200 | -1.24330100 |
| C | 0.51052800  | -2.05676700 | -0.57462100 |
| C | 1.08898900  | -0.87925500 | -1.04596900 |
| N | 0.77399800  | 0.39219000  | -0.30838700 |
| C | 0.93432000  | 1.61333100  | -1.15724300 |
| C | 2.01745900  | 2.46893200  | -0.99109700 |
| C | 2.13904700  | 3.57504800  | -1.83596000 |
| C | 1.18535900  | 3.81196000  | -2.82510100 |
| C | 0.09976900  | 2.94435100  | -2.96568500 |
| C | -0.03492400 | 1.83430700  | -2.13331000 |
| H | 2.33790400  | 0.04961800  | -2.54129400 |
| H | 2.80716000  | -2.07974800 | -3.70369800 |
| H | 1.80004800  | -4.20164000 | -2.88423200 |
| H | 0.31190300  | -4.16858900 | -0.88877600 |
| H | -0.16328500 | -2.03349900 | 0.27267500  |
| H | -0.28317300 | 0.28901000  | -0.07137800 |
| H | 2.74273600  | 2.30624600  | -0.20190900 |
| H | 2.97867800  | 4.25218000  | -1.70882600 |
| H | 1.28075200  | 4.67606700  | -3.47629700 |
| H | -0.65886800 | 3.13371300  | -3.71910200 |
| H | -0.89612600 | 1.17607700  | -2.21882100 |

|   |             |             |             |
|---|-------------|-------------|-------------|
| S | -2.93963200 | -0.08631900 | -0.13524500 |
| O | -3.92467500 | 0.72444300  | 0.59164200  |
| O | -2.75933600 | 0.16723300  | -1.57702700 |
| C | -3.59471900 | -1.82705900 | -0.04455700 |
| F | -4.75651300 | -1.92545900 | -0.69928600 |
| F | -2.71926000 | -2.68610500 | -0.60187600 |
| F | -3.78600200 | -2.19642700 | 1.22934000  |
| O | -1.61972700 | -0.23789300 | 0.59847300  |
| H | 1.26613100  | 1.15351700  | 3.00922800  |

B3LYP/6-31G\*

Thermal correction to Gibbs Free Energy = 0.332879

Sum of electronic and thermal Free Energies = -2016.637882

M06-2X/6-311++G\*\*

Energy = -2016.8438597

No imaginary frequency

**ts3-HOTf**

|   |             |             |             |
|---|-------------|-------------|-------------|
| C | -3.71432800 | -0.23888100 | -0.45544900 |
| C | -4.88626400 | -0.87822700 | -0.85412100 |
| C | -4.97031800 | -1.48007500 | -2.11106700 |
| C | -3.87092400 | -1.43869700 | -2.96918100 |
| C | -2.69873300 | -0.79601200 | -2.57465100 |
| C | -2.60424600 | -0.17922700 | -1.31543800 |
| C | -1.36475600 | 0.56471200  | -0.96241000 |
| C | -0.80150800 | 1.39462800  | -1.86166300 |
| C | 0.43414900  | 2.20654900  | -1.71139300 |
| O | 0.97192600  | 2.43923400  | -2.92274600 |
| O | 0.89123500  | 2.62851100  | -0.66927400 |
| C | 2.24130500  | 3.12737000  | -2.90006800 |
| H | -3.67016100 | 0.22220800  | 0.52465700  |
| H | -5.73659900 | -0.90504700 | -0.17849500 |
| H | -5.88374000 | -1.98299000 | -2.41592700 |
| H | -3.91971200 | -1.91437700 | -3.94467400 |
| H | -1.83805000 | -0.78715100 | -3.23682600 |
| H | 2.54333400  | 3.20428300  | -3.94469000 |
| H | 2.12588800  | 4.12003800  | -2.45708300 |
| H | 2.96538500  | 2.54893600  | -2.32158200 |
| C | -1.71936100 | -1.07231300 | 2.19853200  |
| C | -1.97993500 | -2.33144400 | 2.74259300  |
| C | -1.58054800 | -3.48800200 | 2.07449500  |
| C | -0.91161000 | -3.38131700 | 0.85451200  |
| C | -0.64287100 | -2.13003900 | 0.30279400  |
| C | -1.05390400 | -0.97689300 | 0.97659000  |
| N | -0.72701200 | 0.34049000  | 0.36332900  |
| C | -0.84129000 | 1.47769600  | 1.30855400  |

|   |             |             |             |
|---|-------------|-------------|-------------|
| C | -1.90600500 | 2.37347600  | 1.23827000  |
| C | -1.99477400 | 3.40874600  | 2.17192300  |
| C | -1.02974300 | 3.54182200  | 3.16883400  |
| C | 0.03328000  | 2.63773000  | 3.22487100  |
| C | 0.13456700  | 1.60193100  | 2.29794300  |
| H | -2.02596700 | -0.17994200 | 2.73015600  |
| H | -2.49645700 | -2.40024800 | 3.69572700  |
| H | -1.78183800 | -4.46501700 | 2.50426700  |
| H | -0.58401200 | -4.27358900 | 0.32926900  |
| H | -0.10334900 | -2.05180300 | -0.63314100 |
| H | 0.49308400  | 0.16574400  | 0.03395500  |
| H | -2.65143000 | 2.29135000  | 0.45493200  |
| H | -2.82206100 | 4.11025500  | 2.11144500  |
| H | -1.09971300 | 4.34929500  | 3.89208600  |
| H | 0.80083000  | 2.74154600  | 3.98618800  |
| H | 0.97784300  | 0.91933200  | 2.32835600  |
| S | 2.92858700  | -0.14918600 | 0.07162400  |
| O | 3.84808500  | 0.64357400  | -0.74307200 |
| O | 2.87568400  | 0.06509900  | 1.52235500  |
| C | 3.46130100  | -1.92058300 | -0.15234200 |
| F | 4.68628700  | -2.08946600 | 0.35321400  |
| F | 2.61353700  | -2.74235600 | 0.48412000  |
| F | 3.47694200  | -2.24515500 | -1.45011800 |
| O | 1.51894200  | -0.23248300 | -0.55801300 |
| H | -1.30034000 | 1.49432800  | -2.81961200 |

B3LYP/6-31G\*

Thermal correction to Gibbs Free Energy = 0.328227

Sum of electronic and thermal Free Energies = -2016.640068

M06-2X/6-311++G\*\*

Energy = -2016.8392407

Number of Imaginary Frequencies = 1

Lowest Frequency = 989.81i

**in5-HOTf**

|   |             |             |             |
|---|-------------|-------------|-------------|
| C | -2.09737600 | 3.65512400  | -0.95053600 |
| C | -2.28502300 | 4.68229300  | -1.87153700 |
| C | -2.30567700 | 4.40362200  | -3.24097800 |
| C | -2.12547700 | 3.09319400  | -3.68795700 |
| C | -1.92095000 | 2.06490700  | -2.76922800 |
| C | -1.91224000 | 2.33437300  | -1.39172700 |
| C | -1.62370300 | 1.23976400  | -0.42359100 |
| C | -0.51647200 | 0.44941400  | -0.70978000 |
| C | -0.08739100 | -0.79258300 | -0.16369700 |
| O | -1.02744100 | -1.57703800 | 0.41688000  |
| O | 1.07329500  | -1.26194000 | -0.24749500 |

|    |             |             |             |
|----|-------------|-------------|-------------|
| C  | -0.56011400 | -2.77143700 | 1.10846600  |
| H  | -2.06912600 | 3.87705600  | 0.11109200  |
| H  | -2.40911000 | 5.70278100  | -1.52084000 |
| H  | -2.45826400 | 5.20660600  | -3.95674100 |
| H  | -2.14248900 | 2.87073700  | -4.75099200 |
| H  | -1.78474800 | 1.04346600  | -3.11229100 |
| H  | -1.46486500 | -3.25886300 | 1.46327000  |
| H  | -0.01470700 | -3.41454000 | 0.41750500  |
| H  | 0.08272300  | -2.47177600 | 1.93702300  |
| S  | 4.99623600  | -2.07420800 | -1.06951500 |
| O  | 3.62660900  | -2.48568700 | -0.54397800 |
| C  | 4.30835800  | 2.99781000  | 0.15004700  |
| S  | 2.77777200  | 1.98992800  | 0.48353800  |
| O  | 3.16900700  | 0.94253500  | 1.45336000  |
| O  | 2.52830200  | 1.31550800  | -0.87998300 |
| F  | 5.30781000  | 2.19745600  | -0.22060400 |
| F  | 4.06513600  | 3.88306200  | -0.81739100 |
| F  | 4.65183700  | 3.64523500  | 1.26667900  |
| Cu | 2.87879500  | -0.59122000 | -0.64618800 |
| O  | 5.62494800  | -2.90962900 | -2.07517000 |
| C  | 6.09511600  | -2.09083900 | 0.43746400  |
| F  | 6.24173600  | -3.34638600 | 0.85769900  |
| F  | 7.28259200  | -1.58203400 | 0.11751300  |
| F  | 5.53486600  | -1.35810900 | 1.39846200  |
| O  | 4.79430100  | -0.59784900 | -1.37768600 |
| O  | 1.73925100  | 2.95201300  | 0.85280100  |
| C  | -4.22514400 | 2.47627800  | 1.71179000  |
| C  | -5.55229800 | 2.90053400  | 1.71312800  |
| C  | -6.43083400 | 2.47703300  | 0.71179100  |
| C  | -5.97470900 | 1.61768900  | -0.28854600 |
| C  | -4.64916700 | 1.18196600  | -0.29472100 |
| C  | -3.76962000 | 1.62181700  | 0.69968800  |
| N  | -2.40153500 | 1.16552200  | 0.70927600  |
| C  | -1.89816000 | 0.66944700  | 1.96653900  |
| C  | -0.68322600 | 1.14938300  | 2.46865700  |
| C  | -0.21488000 | 0.67746900  | 3.69549500  |
| C  | -0.96055600 | -0.24679400 | 4.43232900  |
| C  | -2.18303700 | -0.70418800 | 3.93380600  |
| C  | -2.65238200 | -0.25384600 | 2.69989700  |
| H  | -3.54061700 | 2.80474700  | 2.48735200  |
| H  | -5.89861000 | 3.56837600  | 2.49681600  |
| H  | -7.46467000 | 2.81001700  | 0.71658800  |
| H  | -6.65273100 | 1.26852400  | -1.06181300 |
| H  | -4.29995000 | 0.49737100  | -1.05931700 |
| H  | 0.18319700  | 0.86392500  | -1.42295800 |

|   |             |             |             |
|---|-------------|-------------|-------------|
| H | -0.10350400 | 1.87780400  | 1.91019800  |
| H | 0.73354700  | 1.04684200  | 4.07404700  |
| H | -0.59471300 | -0.60260600 | 5.39124900  |
| H | -2.77214500 | -1.41958200 | 4.50094000  |
| H | -3.59216500 | -0.61971000 | 2.29950300  |
| S | -4.02933200 | -3.23983800 | -1.03966700 |
| O | -3.20088000 | -1.87172100 | -1.24312400 |
| O | -4.37111400 | -3.77241400 | -2.34261300 |
| C | -5.59606600 | -2.53332700 | -0.31740600 |
| F | -6.13033200 | -1.65445800 | -1.16467800 |
| F | -6.45121800 | -3.52966800 | -0.10552000 |
| F | -5.32413900 | -1.92652700 | 0.84201800  |
| O | -3.39761800 | -4.03786200 | 0.00514400  |
| H | -2.47390500 | -1.79763100 | -0.56485000 |

B3LYP/6-31G\* (Lanl2DZ for Cu)

Thermal correction to Gibbs Free Energy = 0.358380

Sum of electronic and thermal Free Energies = -4135.633579

M06-2X/6-311++G\*\* (Lanl2DZ for Cu)

Energy = -4135.9324290

No imaginary frequency

#### ts4-HOTf

|   |             |             |             |
|---|-------------|-------------|-------------|
| C | -1.47094900 | 3.52246300  | -1.07336500 |
| C | -1.76504000 | 4.54224300  | -1.97724300 |
| C | -2.39323400 | 4.25073200  | -3.19094400 |
| C | -2.72117400 | 2.93089600  | -3.50472600 |
| C | -2.42764300 | 1.90512100  | -2.60504800 |
| C | -1.80528100 | 2.19552800  | -1.38298900 |
| C | -1.44933300 | 1.09008700  | -0.45011800 |
| C | -0.59712300 | 0.12354600  | -0.83123700 |
| C | -0.10915900 | -1.03546900 | 0.00475600  |
| O | -1.03148500 | -2.10087400 | -0.13468900 |
| O | 1.12567400  | -1.41456500 | -0.09714400 |
| C | -0.53441100 | -3.43638600 | 0.10004600  |
| H | -0.94522800 | 3.74163200  | -0.15004400 |
| H | -1.49091600 | 5.56593800  | -1.73786800 |
| H | -2.62020800 | 5.04948200  | -3.89182200 |
| H | -3.20733700 | 2.69693200  | -4.44775200 |
| H | -2.69148700 | 0.87747800  | -2.83992700 |
| H | -1.38070500 | -4.09451400 | -0.09191800 |
| H | 0.30154100  | -3.65547700 | -0.56580900 |
| H | -0.20730600 | -3.52844400 | 1.14040100  |
| S | 5.04621200  | -1.86446800 | -1.05070300 |
| O | 3.72493800  | -2.43987900 | -0.56768200 |
| C | 3.87403100  | 3.15654000  | 0.23273800  |

|    |             |             |             |
|----|-------------|-------------|-------------|
| S  | 2.42372400  | 2.01994700  | 0.50340500  |
| O  | 2.84031300  | 1.05149200  | 1.54258200  |
| O  | 2.31193700  | 1.29296800  | -0.84399400 |
| F  | 4.95900400  | 2.44621300  | -0.07473300 |
| F  | 3.60314300  | 4.00684400  | -0.75883800 |
| F  | 4.10020900  | 3.84482800  | 1.35531100  |
| Cu | 2.78694400  | -0.59721900 | -0.60765600 |
| O  | 5.77894900  | -2.58281900 | -2.07717200 |
| C  | 6.11649700  | -1.83298900 | 0.47477100  |
| F  | 6.36732500  | -3.08349800 | 0.86168300  |
| F  | 7.26083400  | -1.21058400 | 0.20106200  |
| F  | 5.47530500  | -1.18524300 | 1.44915300  |
| O  | 4.70198200  | -0.40376600 | -1.29854300 |
| O  | 1.27897800  | 2.88759200  | 0.79257300  |
| C  | -3.31429200 | 2.88129700  | 1.96261900  |
| C  | -4.49851000 | 3.58612400  | 2.18066400  |
| C  | -5.65627500 | 3.24730900  | 1.47620100  |
| C  | -5.63021200 | 2.19856500  | 0.55408400  |
| C  | -4.45181100 | 1.48467600  | 0.33376500  |
| C  | -3.29790500 | 1.83358600  | 1.03816200  |
| N  | -2.06908600 | 1.09564900  | 0.84250200  |
| C  | -1.66490500 | 0.20721100  | 1.80303400  |
| C  | -0.32957400 | -0.34933400 | 1.69819800  |
| C  | 0.09007000  | -1.29782600 | 2.70548200  |
| C  | -0.76321600 | -1.72339300 | 3.68715200  |
| C  | -2.07156800 | -1.17519900 | 3.74067500  |
| C  | -2.52099900 | -0.22854100 | 2.83799700  |
| H  | -2.40341700 | 3.14184200  | 2.49333800  |
| H  | -4.51238200 | 4.40436000  | 2.89478100  |
| H  | -6.57596100 | 3.80022500  | 1.64453600  |
| H  | -6.52851700 | 1.92698000  | 0.00747800  |
| H  | -4.42478000 | 0.66676700  | -0.37636000 |
| H  | -0.21102000 | 0.14280000  | -1.84426600 |
| H  | 0.42489000  | 0.41402700  | 1.49913800  |
| H  | 1.10983600  | -1.66515800 | 2.63968000  |
| H  | -0.45355700 | -2.45624200 | 4.42510500  |
| H  | -2.75445800 | -1.51679000 | 4.51446400  |
| H  | -3.52888000 | 0.15925100  | 2.91206100  |
| S  | -4.36361300 | -2.95144200 | -1.32593600 |
| O  | -3.34834100 | -1.71410400 | -1.43900100 |
| O  | -5.12167500 | -3.04266000 | -2.55762000 |
| C  | -5.51869300 | -2.27474800 | -0.02963300 |
| F  | -6.15699400 | -1.20148400 | -0.50260100 |
| F  | -6.40517000 | -3.21191200 | 0.29402900  |
| F  | -4.81938400 | -1.92711100 | 1.05671500  |

|   |             |             |             |
|---|-------------|-------------|-------------|
| O | -3.69147200 | -4.09733300 | -0.72416000 |
| H | -2.49162500 | -1.88898600 | -0.93643000 |

B3LYP/6-31G\* (Lanl2DZ for Cu)

Thermal correction to Gibbs Free Energy = 0.357928

Sum of electronic and thermal Free Energies = -4135.577105

M06-2X/6-311++G\*\* (Lanl2DZ for Cu)

Energy = -4135.8805491

Number of Imaginary Frequencies = 1

Lowest Frequency = 413.17i

### in6-HOTf

|    |             |             |             |
|----|-------------|-------------|-------------|
| C  | -1.62521000 | 2.84778800  | -2.01050100 |
| C  | -2.15282200 | 3.57972500  | -3.07481700 |
| C  | -3.22225800 | 3.07516100  | -3.81811700 |
| C  | -3.76422900 | 1.82869400  | -3.49968500 |
| C  | -3.24084200 | 1.08932200  | -2.43803500 |
| C  | -2.17363500 | 1.59890800  | -1.68431300 |
| C  | -1.59042200 | 0.76939900  | -0.58713200 |
| C  | -0.73524100 | -0.23256200 | -0.84493400 |
| C  | -0.14795300 | -1.15961000 | 0.19031800  |
| O  | -1.03604700 | -2.33851500 | 0.15190800  |
| O  | 1.11893100  | -1.54471200 | -0.01882800 |
| C  | -0.45780100 | -3.61936700 | 0.46852200  |
| H  | -0.78094100 | 3.22755500  | -1.44422400 |
| H  | -1.71898000 | 4.54293900  | -3.32886500 |
| H  | -3.62659800 | 3.64817700  | -4.64823400 |
| H  | -4.58910600 | 1.42541600  | -4.08044500 |
| H  | -3.65543000 | 0.11583600  | -2.19450500 |
| H  | -1.22737100 | -4.35388400 | 0.22930900  |
| H  | 0.44955100  | -3.78991000 | -0.11164500 |
| H  | -0.22959400 | -3.67662000 | 1.53884700  |
| S  | 5.01736100  | -1.73042400 | -1.06410800 |
| O  | 3.75361700  | -2.43202000 | -0.60783300 |
| C  | 3.59794500  | 3.15450800  | 0.05186400  |
| S  | 2.03678800  | 2.15702300  | 0.24476900  |
| O  | 2.19580000  | 1.40814100  | 1.51285400  |
| O  | 2.07953800  | 1.21348600  | -0.95426700 |
| F  | 4.66056000  | 2.35464500  | 0.14340300  |
| F  | 3.60010100  | 3.76521200  | -1.13282300 |
| F  | 3.65040100  | 4.07119500  | 1.02246400  |
| Cu | 2.64898900  | -0.64918500 | -0.64639400 |
| O  | 5.84286200  | -2.36610300 | -2.07501200 |
| C  | 6.04441500  | -1.59689800 | 0.48378600  |
| F  | 6.40233500  | -2.81571100 | 0.88680600  |
| F  | 7.13182200  | -0.86803200 | 0.24192400  |



|   |             |             |             |
|---|-------------|-------------|-------------|
| F | 5.31883100  | -1.00938500 | 1.44192300  |
| O | 4.54642600  | -0.30538900 | -1.31310800 |
| O | 0.93258600  | 3.12273600  | 0.16859200  |
| C | -2.42827400 | 3.37523400  | 1.35714800  |
| C | -3.30508800 | 4.43067900  | 1.61114600  |
| C | -4.68501100 | 4.23804500  | 1.51128000  |
| C | -5.19374700 | 2.98768600  | 1.15326000  |
| C | -4.32804500 | 1.92298400  | 0.89601900  |
| C | -2.95310500 | 2.13052300  | 1.00210800  |
| N | -2.01978900 | 1.04040800  | 0.75951000  |
| C | -1.52500800 | 0.35255600  | 1.80436000  |
| C | -0.30049100 | -0.46831300 | 1.59917300  |
| C | 0.14023100  | -1.29057300 | 2.74624700  |
| C | -0.45111900 | -1.19413900 | 3.96246800  |
| C | -1.56028300 | -0.30531800 | 4.13050200  |
| C | -2.07626500 | 0.45548800  | 3.10821300  |
| H | -1.35166500 | 3.51099000  | 1.40591200  |
| H | -2.90643200 | 5.40389300  | 1.88177500  |
| H | -5.36379300 | 5.06279200  | 1.70850900  |
| H | -6.26611600 | 2.83689600  | 1.07152700  |
| H | -4.71254700 | 0.95003200  | 0.61424000  |
| H | -0.47649100 | -0.44851800 | -1.87594600 |
| H | 0.50067300  | 0.31238200  | 1.54105300  |
| H | 1.00773000  | -1.91821200 | 2.57137200  |
| H | -0.09633500 | -1.77181000 | 4.80971000  |
| H | -2.02289400 | -0.23049900 | 5.11135700  |
| H | -2.92510500 | 1.10361700  | 3.28419200  |
| S | -4.23739200 | -3.39300900 | -0.86225200 |
| O | -3.06829500 | -2.49830700 | -1.46866400 |
| O | -5.14744000 | -3.74546500 | -1.93412900 |
| C | -5.09610100 | -2.10753800 | 0.17350400  |
| F | -5.56001000 | -1.11857100 | -0.60120000 |
| F | -6.10895500 | -2.66033300 | 0.83439000  |
| F | -4.22526500 | -1.58562200 | 1.05359000  |
| O | -3.71081700 | -4.37448900 | 0.07863900  |
| H | -2.26229900 | -2.43478700 | -0.83946500 |

B3LYP/6-31G\* (Lanl2DZ for Cu)

Thermal correction to Gibbs Free Energy = 0.361288

Sum of electronic and thermal Free Energies = -4135.579791

M06-2X/6-311++G\*\* (Lanl2DZ for Cu)

Energy = -4135.8890350

No imaginary frequency

**in7-HOTf**

|   |             |             |            |
|---|-------------|-------------|------------|
| C | -4.09525700 | -1.04058200 | 3.18669700 |
|---|-------------|-------------|------------|

|    |             |             |             |
|----|-------------|-------------|-------------|
| C  | -4.87115500 | -0.43782200 | 4.17472900  |
| C  | -4.81220400 | 0.94508700  | 4.36654200  |
| C  | -3.97249600 | 1.72217500  | 3.56715100  |
| C  | -3.19459800 | 1.12289400  | 2.57599800  |
| C  | -3.24923700 | -0.26517200 | 2.37798800  |
| C  | -2.35335300 | -0.89262000 | 1.37283500  |
| C  | -1.02834100 | -0.67663400 | 1.34858400  |
| C  | -0.10065800 | -1.33895500 | 0.34067600  |
| O  | -0.21709000 | -0.49507900 | -0.85229200 |
| O  | 1.14188000  | -1.57043800 | 0.74221300  |
| C  | 0.69634400  | -0.75326400 | -1.93685500 |
| H  | -4.12871500 | -2.11895600 | 3.05866700  |
| H  | -5.51450800 | -1.04872700 | 4.80182000  |
| H  | -5.41722400 | 1.41313500  | 5.13797600  |
| H  | -3.92271700 | 2.79772500  | 3.70983500  |
| H  | -2.55160600 | 1.72762200  | 1.94336500  |
| H  | 0.75726500  | 0.16860500  | -2.51626300 |
| H  | 1.68176700  | -1.02764900 | -1.55957800 |
| H  | 0.30718500  | -1.56301200 | -2.56446600 |
| S  | 2.50517300  | 2.22238100  | 1.88094600  |
| O  | 1.32252500  | 1.31849600  | 1.52815600  |
| C  | 5.09472500  | -1.24607000 | -1.01352900 |
| S  | 4.38385400  | -2.53648100 | 0.12270700  |
| O  | 3.28938000  | -3.12940500 | -0.66178800 |
| O  | 3.90945700  | -1.65047300 | 1.28134100  |
| F  | 4.14742800  | -0.30436100 | -1.25958600 |
| F  | 6.14875500  | -0.64450600 | -0.46704000 |
| F  | 5.45121200  | -1.79005500 | -2.17900700 |
| Cu | 2.48178600  | -0.34183700 | 1.25971200  |
| O  | 2.33509600  | 3.13886100  | 2.99413700  |
| C  | 2.72452500  | 3.24814800  | 0.33970800  |
| F  | 1.64037300  | 4.00164300  | 0.15866800  |
| F  | 3.79556000  | 4.02690500  | 0.47292900  |
| F  | 2.88755900  | 2.43622500  | -0.70656300 |
| O  | 3.67433700  | 1.26542900  | 1.88916800  |
| O  | 5.49564800  | -3.38805000 | 0.53133400  |
| C  | -5.33979500 | -2.40551100 | 0.29952500  |
| C  | -6.64694700 | -2.13145900 | -0.10617600 |
| C  | -6.93206600 | -0.96079500 | -0.81299900 |
| C  | -5.90791900 | -0.06206300 | -1.11963600 |
| C  | -4.59718600 | -0.32868100 | -0.72328900 |
| C  | -4.32570300 | -1.49963500 | -0.01444100 |
| N  | -2.95249000 | -1.76320700 | 0.38324400  |
| C  | -2.20200000 | -2.63655500 | -0.31389800 |
| C  | -0.76266500 | -2.76292300 | 0.05843500  |

|   |             |             |             |
|---|-------------|-------------|-------------|
| C | 0.06609700  | -3.67142000 | -0.77356100 |
| C | -0.48729100 | -4.42332600 | -1.75869700 |
| C | -1.88125900 | -4.28586900 | -2.04837600 |
| C | -2.71651400 | -3.42190600 | -1.37464200 |
| H | -5.10913300 | -3.30938600 | 0.85545200  |
| H | -7.44132900 | -2.83098200 | 0.13660200  |
| H | -7.95121200 | -0.74961300 | -1.12309200 |
| H | -6.12046500 | 0.84820400  | -1.67203300 |
| H | -3.79519600 | 0.36218400  | -0.95786500 |
| H | -0.57667500 | 0.00453800  | 2.05945100  |
| H | -0.73275700 | -3.17814400 | 1.08474200  |
| H | 1.12916500  | -3.69462400 | -0.54174800 |
| H | 0.11825500  | -5.10062400 | -2.35188300 |
| H | -2.30418900 | -4.87762700 | -2.85672700 |
| H | -3.75743500 | -3.33817600 | -1.65808700 |
| S | -1.08665100 | 2.89185900  | -1.78625700 |
| O | -1.39352900 | 1.84636600  | -0.61617200 |
| O | -1.50935700 | 4.20683200  | -1.34819000 |
| C | -2.33991900 | 2.30041200  | -3.03179400 |
| F | -3.57912800 | 2.43189000  | -2.54202100 |
| F | -2.22978700 | 3.00840200  | -4.15131600 |
| F | -2.11943900 | 1.00524100  | -3.29772100 |
| O | 0.21985300  | 2.63219500  | -2.37792500 |
| H | -0.83203300 | 1.00205100  | -0.69964200 |

B3LYP/6-31G\* (Lanl2DZ for Cu)

Thermal correction to Gibbs Free Energy = 0.361550

Sum of electronic and thermal Free Energies = -4135.570864

M06-2X/6-311++G\*\* (Lanl2DZ for Cu)

Energy = -4135.8912499

No imaginary frequency

### ts5-HOTf

|   |             |             |             |
|---|-------------|-------------|-------------|
| C | -2.53574900 | -1.59279000 | 3.40033300  |
| C | -3.04181900 | -1.12752400 | 4.61187100  |
| C | -3.25375200 | 0.24074200  | 4.80282100  |
| C | -2.95404200 | 1.14139200  | 3.78008800  |
| C | -2.44355000 | 0.68360000  | 2.56446000  |
| C | -2.23393600 | -0.69026900 | 2.36820700  |
| C | -1.62016100 | -1.15226700 | 1.09647400  |
| C | -0.42728000 | -0.68877500 | 0.67953400  |
| C | 0.23246300  | -1.13501000 | -0.59309000 |
| O | -0.42996400 | -0.22146700 | -1.76161800 |
| O | 1.52453000  | -1.08434100 | -0.69321700 |
| C | 0.45613700  | 0.48572200  | -2.66642500 |
| H | -2.35529800 | -2.65547700 | 3.26407200  |

|    |             |             |             |
|----|-------------|-------------|-------------|
| H  | -3.26198700 | -1.83121100 | 5.40970700  |
| H  | -3.64800600 | 0.60183300  | 5.74863500  |
| H  | -3.11697200 | 2.20569200  | 3.92124600  |
| H  | -2.22321200 | 1.38767700  | 1.76793500  |
| H  | -0.12356400 | 1.32141700  | -3.06171500 |
| H  | 1.33082200  | 0.85295700  | -2.13164700 |
| H  | 0.75673200  | -0.19650400 | -3.46464100 |
| S  | 2.55715300  | 2.28273000  | 1.04121000  |
| O  | 2.16729200  | 0.87527300  | 1.55259900  |
| C  | 6.60225000  | -0.36908600 | -0.67138300 |
| S  | 5.43540600  | -1.44445900 | 0.30730900  |
| O  | 4.27550300  | -1.70738200 | -0.64327100 |
| O  | 4.82128400  | -0.51475500 | 1.33773000  |
| F  | 5.94240200  | 0.68144100  | -1.15239600 |
| F  | 7.58964400  | 0.04146100  | 0.12115500  |
| F  | 7.10532500  | -1.08254400 | -1.68067500 |
| Cu | 3.00542200  | -0.42675700 | 0.35387300  |
| O  | 3.16807600  | 3.13436300  | 2.05182100  |
| C  | 0.87069900  | 3.00532100  | 0.71443900  |
| F  | 0.13433300  | 2.97403000  | 1.82808100  |
| F  | 0.98076300  | 4.25536400  | 0.28189600  |
| F  | 0.25393900  | 2.26387500  | -0.22630400 |
| O  | 3.19561700  | 2.12307700  | -0.28450800 |
| O  | 6.19856700  | -2.58779800 | 0.77755700  |
| C  | -4.26820800 | -3.43626400 | 1.05924300  |
| C  | -5.63926900 | -3.58791500 | 1.26968900  |
| C  | -6.51704600 | -2.55248300 | 0.93804100  |
| C  | -6.02550800 | -1.36547800 | 0.39058600  |
| C  | -4.65671000 | -1.20073300 | 0.17251600  |
| C  | -3.79434500 | -2.24098500 | 0.51506300  |
| N  | -2.36453400 | -2.08268600 | 0.27855000  |
| C  | -1.79585600 | -2.68545600 | -0.77500800 |
| C  | -0.31216000 | -2.56401900 | -0.93321000 |
| C  | 0.26861900  | -3.14008500 | -2.17395900 |
| C  | -0.48703400 | -3.83417100 | -3.05354900 |
| C  | -1.89649200 | -3.97708500 | -2.81407600 |
| C  | -2.53645100 | -3.43796300 | -1.72564700 |
| H  | -3.57475500 | -4.23098800 | 1.31905000  |
| H  | -6.01786800 | -4.51198700 | 1.69635700  |
| H  | -7.58332100 | -2.67267000 | 1.10616100  |
| H  | -6.70232600 | -0.55922400 | 0.12480400  |
| H  | -4.26005900 | -0.28967500 | -0.25976800 |
| H  | 0.09859300  | 0.04804100  | 1.27426700  |
| H  | 0.11576900  | -3.14493400 | -0.09021200 |
| H  | 1.33361200  | -2.98156400 | -2.31013100 |

|   |             |             |             |
|---|-------------|-------------|-------------|
| H | -0.05407600 | -4.26777500 | -3.94905300 |
| H | -2.49238100 | -4.52220700 | -3.54160200 |
| H | -3.60619600 | -3.54923600 | -1.60899900 |
| S | -2.73666800 | 2.38192200  | -1.41567800 |
| O | -2.52981600 | 0.86061800  | -1.24800800 |
| O | -2.81347600 | 3.07769100  | -0.12957200 |
| C | -4.47370700 | 2.37102400  | -2.07991700 |
| F | -5.30258900 | 1.76759700  | -1.20528400 |
| F | -4.89362500 | 3.62194300  | -2.27024900 |
| F | -4.52912200 | 1.70860900  | -3.23990600 |
| O | -1.89962700 | 2.92991200  | -2.48720100 |
| H | -1.37137700 | 0.36332000  | -1.50002500 |

B3LYP/6-31G\* (Lanl2DZ for Cu)

Thermal correction to Gibbs Free Energy = 0.359756

Sum of electronic and thermal Free Energies = -4135.567467

M06-2X/6-311++G\*\* (Lanl2DZ for Cu)

Energy = -4135.8905221

Number of Imaginary Frequencies = 1

Lowest Frequency = 308.88i

### in8-HOTf

|   |             |             |             |
|---|-------------|-------------|-------------|
| C | -4.05068000 | -0.51868600 | -2.31075800 |
| C | -4.68382700 | -1.03267500 | -3.43944300 |
| C | -4.55552100 | -2.38573400 | -3.76475800 |
| C | -3.77732400 | -3.22518700 | -2.96515900 |
| C | -3.12528300 | -2.71426100 | -1.84434100 |
| C | -3.26652800 | -1.35865800 | -1.50097900 |
| C | -2.49807500 | -0.82734900 | -0.35167600 |
| C | -1.14652200 | -1.03251000 | -0.28338800 |
| C | -0.32037800 | -0.47137800 | 0.74465400  |
| O | 0.89459600  | -0.63659100 | 0.85290600  |
| H | -4.14129700 | 0.53699300  | -2.07870800 |
| H | -5.27297500 | -0.37375900 | -4.06987700 |
| H | -5.05643600 | -2.78247100 | -4.64264700 |
| H | -3.67373000 | -4.27673700 | -3.21434300 |
| H | -2.52085400 | -3.36889200 | -1.22296700 |
| S | 4.62148000  | -1.55929800 | -0.08873200 |
| O | 3.55826100  | -1.30632800 | -1.16136100 |
| C | 2.09905100  | 3.89075300  | -1.41636700 |
| S | 1.33519000  | 2.41647600  | -0.55510000 |
| O | 2.23968500  | 2.08711100  | 0.61872000  |
| O | 1.51226300  | 1.23658600  | -1.49084500 |
| F | 3.36118200  | 3.59781800  | -1.70377600 |
| F | 1.41490600  | 4.13069800  | -2.52704700 |
| F | 2.04047400  | 4.93430500  | -0.59989300 |

|    |             |             |             |
|----|-------------|-------------|-------------|
| Cu | 2.76846300  | 0.25051800  | -0.17723100 |
| O  | 5.99461500  | -1.73122500 | -0.50924300 |
| C  | 4.08207400  | -3.13311600 | 0.76500500  |
| F  | 4.17084500  | -4.13892900 | -0.09643700 |
| F  | 4.87564100  | -3.34489200 | 1.80667600  |
| F  | 2.82016500  | -2.99762600 | 1.17492200  |
| O  | 4.29921300  | -0.44354500 | 0.90938800  |
| O  | -0.04715000 | 2.78269300  | -0.21871100 |
| C  | -5.32917900 | 1.05829200  | 0.44927300  |
| C  | -6.72398400 | 1.06141300  | 0.50084900  |
| C  | -7.41691100 | -0.11305200 | 0.80518500  |
| C  | -6.71748700 | -1.29448900 | 1.06374500  |
| C  | -5.32265500 | -1.30965900 | 1.01806200  |
| C  | -4.64504200 | -0.13167600 | 0.70328300  |
| N  | -3.18401700 | -0.12957000 | 0.67491200  |
| C  | -2.51493600 | 0.39980700  | 1.73581500  |
| C  | -1.03911400 | 0.53690000  | 1.65427700  |
| C  | -0.32510000 | 0.91179700  | 2.89290800  |
| C  | -1.00605300 | 1.30585600  | 3.99983800  |
| C  | -2.43192300 | 1.27898200  | 3.98545400  |
| C  | -3.17217100 | 0.84894600  | 2.89976700  |
| H  | -4.78043400 | 1.96470900  | 0.20966700  |
| H  | -7.26578200 | 1.98046100  | 0.30040700  |
| H  | -8.50186200 | -0.10722800 | 0.84209600  |
| H  | -7.25487400 | -2.20641200 | 1.30429400  |
| H  | -4.77131600 | -2.22288400 | 1.21878200  |
| H  | -0.66146900 | -1.61527800 | -1.05714700 |
| H  | -0.89392600 | 1.45521600  | 1.00529100  |
| H  | 0.75833200  | 0.91008100  | 2.84090500  |
| H  | -0.48348300 | 1.62142500  | 4.89640600  |
| H  | -2.96769700 | 1.58827300  | 4.87897100  |
| H  | -4.25158100 | 0.81574400  | 2.96118200  |

B3LYP/6-31G\* (Lanl2DZ for Cu)

Thermal correction to Gibbs Free Energy = 0.292617

Sum of electronic and thermal Free Energies = -3058.296180

M06-2X/6-311++G\*\* (Lanl2DZ for Cu)

Energy = -3058.5510466

No imaginary frequency

#### ts6-HOTf

|   |            |            |             |
|---|------------|------------|-------------|
| C | 4.15949000 | 1.06757000 | -1.98906500 |
| C | 4.75457000 | 1.98223100 | -2.85509200 |
| C | 4.64141700 | 3.35418300 | -2.61763700 |
| C | 3.91305400 | 3.81163000 | -1.51858400 |
| C | 3.30407800 | 2.90219400 | -0.65489100 |

|    |             |             |             |
|----|-------------|-------------|-------------|
| C  | 3.43608800  | 1.52130900  | -0.87431700 |
| C  | 2.71225700  | 0.58940700  | 0.02982800  |
| C  | 1.36074800  | 0.76494400  | 0.21733300  |
| C  | 0.58613800  | -0.11452700 | 1.01919500  |
| O  | -0.64853600 | -0.01316800 | 1.24143900  |
| H  | 4.23267000  | 0.00577800  | -2.19664500 |
| H  | 5.29817000  | 1.62138300  | -3.72328800 |
| H  | 5.10779500  | 4.06360200  | -3.29522900 |
| H  | 3.80674800  | 4.87686000  | -1.33637200 |
| H  | 2.71563900  | 3.26068900  | 0.18333900  |
| S  | -2.01293400 | 3.30104600  | -0.03737600 |
| O  | -1.31616100 | 2.11608600  | -0.73899200 |
| C  | -5.71982400 | -0.12124500 | 0.50134500  |
| S  | -4.31608600 | -0.84189500 | -0.49310200 |
| O  | -3.23257000 | -1.12737600 | 0.53990300  |
| O  | -3.73816200 | 0.32563200  | -1.27050900 |
| F  | -5.27590700 | 0.88300900  | 1.25005500  |
| F  | -6.66436700 | 0.31660100  | -0.32961200 |
| F  | -6.22444400 | -1.07608700 | 1.28678900  |
| Cu | -2.06058400 | 0.43413400  | -0.07348700 |
| O  | -2.42685800 | 4.35651300  | -0.95243900 |
| C  | -0.59325000 | 4.02813700  | 0.92668100  |
| F  | 0.39818000  | 4.39382300  | 0.09436100  |
| F  | -1.00252300 | 5.09860800  | 1.60678700  |
| F  | -0.09403100 | 3.12981100  | 1.79320300  |
| O  | -2.94602100 | 2.78358600  | 0.97920600  |
| O  | -4.86401200 | -1.96473100 | -1.23329400 |
| C  | 5.36466400  | -1.60077200 | -0.21737800 |
| C  | 6.74819100  | -1.73778600 | -0.33417400 |
| C  | 7.59919900  | -0.83394400 | 0.30737400  |
| C  | 7.06777300  | 0.20650800  | 1.07243700  |
| C  | 5.68501700  | 0.34894600  | 1.20042600  |
| C  | 4.84580900  | -0.55246200 | 0.54591900  |
| N  | 3.40430700  | -0.42737800 | 0.68086800  |
| C  | 2.74297300  | -1.30258300 | 1.52728200  |
| C  | 1.30213200  | -1.30018100 | 1.54871600  |
| C  | 0.62373100  | -2.14553000 | 2.49014200  |
| C  | 1.32029500  | -3.05968300 | 3.24115700  |
| C  | 2.72839900  | -3.09988800 | 3.14579700  |
| C  | 3.43327600  | -2.24633500 | 2.31440400  |
| H  | 4.68836500  | -2.29244700 | -0.71200800 |
| H  | 7.15843000  | -2.54761800 | -0.92997900 |
| H  | 8.67563000  | -0.94117700 | 0.21146100  |
| H  | 7.72732800  | 0.90848600  | 1.57367500  |
| H  | 5.26112200  | 1.15391500  | 1.79251800  |

|   |             |             |             |
|---|-------------|-------------|-------------|
| H | 0.85618400  | 1.57238300  | -0.29577100 |
| H | 1.13819100  | -2.01440400 | 0.48610200  |
| H | -0.45566500 | -2.05595400 | 2.54091700  |
| H | 0.80139700  | -3.72687200 | 3.92140200  |
| H | 3.28341100  | -3.81248100 | 3.74946600  |
| H | 4.51358300  | -2.29320800 | 2.28325600  |
| S | 0.05778000  | -2.51374800 | -1.57717200 |
| O | 0.55075300  | -2.94308300 | -2.87528600 |
| O | 1.18263800  | -2.68292600 | -0.49598700 |
| C | -1.17059600 | -3.78603900 | -0.98953100 |
| F | -0.67318100 | -5.01059100 | -1.16905900 |
| F | -1.40598500 | -3.59749100 | 0.31564500  |
| F | -2.30110800 | -3.65525900 | -1.67235600 |
| O | -0.61430200 | -1.21328100 | -1.44053200 |

B3LYP/6-31G\* (Lanl2DZ for Cu)

Thermal correction to Gibbs Free Energy = 0.309158

Sum of electronic and thermal Free Energies = -4019.929279

M06-2X/6-311++G\*\* (Lanl2DZ for Cu)

Energy = -4020.2022307

Number of Imaginary Frequencies = 1

Lowest Frequency = 41.34i

HOTs-assisted reaction

**ts2-HOTs**

|   |             |             |             |
|---|-------------|-------------|-------------|
| C | 0.23050200  | 2.19868400  | 2.46227400  |
| C | 0.22638500  | 2.15824600  | 3.85675400  |
| C | 1.09311900  | 1.30599600  | 4.54285000  |
| C | 1.96147700  | 0.47531200  | 3.83214000  |
| C | 1.97774000  | 0.50555600  | 2.43846800  |
| C | 1.12023000  | 1.37924700  | 1.74713400  |
| C | 1.11278000  | 1.38614800  | 0.26330800  |
| C | 0.33956600  | 0.58378900  | -0.50605700 |
| C | 0.33545200  | 0.67252000  | -2.00029300 |
| O | -0.55900500 | -0.13976600 | -2.52851900 |
| O | 1.06607500  | 1.40757700  | -2.67112200 |
| C | -0.67528300 | -0.13233900 | -3.96543200 |
| H | -0.48580200 | 2.82341000  | 1.94029900  |
| H | -0.47373400 | 2.78377600  | 4.40266600  |
| H | 1.07840200  | 1.27486200  | 5.62888900  |
| H | 2.62035800  | -0.20915900 | 4.35855600  |
| H | 2.63990600  | -0.15450300 | 1.88656000  |
| H | -1.44030200 | -0.87335600 | -4.19131700 |
| H | -0.98242100 | 0.86023400  | -4.30115700 |
| H | 0.28063200  | -0.40689400 | -4.41628600 |



|    |             |             |             |
|----|-------------|-------------|-------------|
| S  | 2.90676100  | -2.18648600 | -1.19743400 |
| O  | 1.42661300  | -1.95173500 | -1.55829300 |
| C  | -2.70838100 | -3.02778400 | 1.40464200  |
| S  | -0.88403200 | -3.00230900 | 1.80326500  |
| O  | -0.52209600 | -1.51943400 | 1.82102800  |
| O  | -0.21079300 | -3.49724800 | 0.54048900  |
| F  | -2.91157100 | -2.51292800 | 0.19373600  |
| F  | -3.13856200 | -4.28953800 | 1.42994800  |
| F  | -3.37201400 | -2.31323100 | 2.31469400  |
| Cu | 0.38738300  | -1.53869400 | 0.03701400  |
| O  | 3.81962600  | -1.58996200 | -2.17222300 |
| C  | 3.08193500  | -4.03028000 | -1.40612700 |
| F  | 2.75309400  | -4.37329800 | -2.65357600 |
| F  | 4.35355600  | -4.37022800 | -1.17590900 |
| F  | 2.29222600  | -4.67059600 | -0.54681100 |
| O  | 3.10233600  | -1.91139600 | 0.24166000  |
| O  | -0.70742600 | -3.74785200 | 3.03605000  |
| C  | 4.06313200  | 2.43319400  | 1.04955700  |
| C  | 5.40384800  | 2.10584900  | 1.24761300  |
| C  | 6.12477300  | 1.44086600  | 0.25187900  |
| C  | 5.50541200  | 1.10038000  | -0.94989700 |
| C  | 4.16777000  | 1.43335200  | -1.16936600 |
| C  | 3.46449500  | 2.10025200  | -0.16824000 |
| N  | 2.03325000  | 2.40109900  | -0.43255500 |
| C  | 1.58765900  | 3.83223800  | -0.27693900 |
| C  | 0.23502900  | 4.10140400  | -0.48382600 |
| C  | -0.20896900 | 5.42214300  | -0.41085900 |
| C  | 0.68946600  | 6.45949400  | -0.15921400 |
| C  | 2.04449200  | 6.17343200  | 0.00712600  |
| C  | 2.50653000  | 4.85641800  | -0.05437100 |
| H  | 3.50053000  | 2.93851800  | 1.82470400  |
| H  | 5.88012700  | 2.36414600  | 2.18857400  |
| H  | 7.16541900  | 1.17964200  | 0.41978100  |
| H  | 6.04584200  | 0.55796900  | -1.71809300 |
| H  | 3.68224000  | 1.14584000  | -2.09566900 |
| H  | 1.86121800  | 2.17608800  | -1.45249300 |
| H  | -0.48393200 | 3.32243900  | -0.71827600 |
| H  | -1.26584800 | 5.62162700  | -0.55569400 |
| H  | 0.33836800  | 7.48569900  | -0.10272400 |
| H  | 2.75682700  | 6.97384800  | 0.18426900  |
| H  | 3.56269400  | 4.65260300  | 0.05971500  |
| S  | -2.83256200 | 1.71543000  | -0.18062900 |
| O  | -2.14549600 | 0.39308800  | 0.24735900  |
| O  | -2.87375900 | 2.68293900  | 0.93191900  |
| O  | -2.23494200 | 2.22635200  | -1.44225000 |

|   |             |             |             |
|---|-------------|-------------|-------------|
| H | -0.85114000 | 0.36826900  | -0.04168300 |
| C | -4.50215600 | 1.18152700  | -0.54930500 |
| C | -5.14521000 | 0.25897200  | 0.28134800  |
| C | -5.16250700 | 1.73700200  | -1.64355700 |
| C | -6.46120200 | -0.10029100 | 0.00464100  |
| H | -4.61389500 | -0.18609400 | 1.11540100  |
| C | -6.48331800 | 1.36789200  | -1.90351100 |
| H | -4.64006400 | 2.43744300  | -2.28634400 |
| C | -7.15357800 | 0.45018400  | -1.08591800 |
| H | -6.96117500 | -0.82436100 | 0.64411600  |
| H | -6.99880600 | 1.79763100  | -2.75919100 |
| C | -8.58792500 | 0.06193300  | -1.35912300 |
| H | -8.92357600 | 0.42794000  | -2.33446400 |
| H | -8.71806600 | -1.02657500 | -1.34352800 |
| H | -9.26254700 | 0.47712000  | -0.59910200 |

B3LYP/6-31G\* (Lanl2DZ for Cu)

Thermal correction to Gibbs Free Energy = 0.457536

Sum of electronic and thermal Free Energies = -4068.813208

M06-2X/6-311++G\*\* (Lanl2DZ for Cu)

Energy = -4069.1660838

Number of Imaginary Frequencies = 1

Lowest Frequency = 956.26i

### in3-HOTs

|   |             |             |             |
|---|-------------|-------------|-------------|
| C | 1.00909700  | -2.39000700 | -0.87277300 |
| C | 1.25607100  | -3.68386400 | -1.33443900 |
| C | 2.35305900  | -3.94882100 | -2.15472600 |
| C | 3.20318300  | -2.90893300 | -2.53689300 |
| C | 2.96669800  | -1.61285800 | -2.08109000 |
| C | 1.88305500  | -1.34768800 | -1.22643400 |
| C | 1.58399600  | 0.03983200  | -0.78353200 |
| C | 0.67087000  | 0.82226800  | -1.37293400 |
| C | 0.26803800  | 2.16644200  | -0.89119700 |
| O | -0.60160300 | 2.74345500  | -1.69661300 |
| O | 0.74288600  | 2.71120700  | 0.11354100  |
| C | -1.26994700 | 3.91294000  | -1.18297800 |
| H | 0.12063600  | -2.18522900 | -0.28018100 |
| H | 0.57136000  | -4.48155600 | -1.06140800 |
| H | 2.53440300  | -4.95839100 | -2.51402200 |
| H | 4.04048800  | -3.10153500 | -3.20223600 |
| H | 3.61050200  | -0.80080100 | -2.40479000 |
| H | -1.89658900 | 4.26576500  | -2.00113000 |
| H | -1.87787400 | 3.60774800  | -0.32885600 |
| H | -0.54480400 | 4.67470800  | -0.88790700 |
| C | 4.68421700  | 0.00264700  | 0.04855100  |

|   |             |             |             |
|---|-------------|-------------|-------------|
| C | 5.99233100  | 0.41439200  | -0.20955600 |
| C | 6.30019400  | 1.77212900  | -0.31523700 |
| C | 5.29452200  | 2.72657500  | -0.16129900 |
| C | 3.98174200  | 2.33003600  | 0.09746900  |
| C | 3.68881300  | 0.96964500  | 0.20032200  |
| N | 2.27687800  | 0.59393100  | 0.45719900  |
| C | 1.99109300  | -0.19738200 | 1.70800900  |
| C | 0.64981700  | -0.47161400 | 1.96348500  |
| C | 0.31710900  | -1.17706100 | 3.11952200  |
| C | 1.30867100  | -1.57070200 | 4.01838200  |
| C | 2.64233800  | -1.25162300 | 3.76175500  |
| C | 2.99724100  | -0.55927100 | 2.60134200  |
| H | 4.44725100  | -1.05067100 | 0.13154600  |
| H | 6.77101100  | -0.33352400 | -0.32606500 |
| H | 7.32113300  | 2.08390100  | -0.51518500 |
| H | 5.52551700  | 3.78454900  | -0.24084400 |
| H | 3.19433900  | 3.06810500  | 0.21102000  |
| H | 1.75644200  | 1.51006500  | 0.58839900  |
| H | -0.14242600 | -0.15227200 | 1.29244600  |
| H | -0.72777200 | -1.41467800 | 3.29027800  |
| H | 1.04515900  | -2.11965900 | 4.91802400  |
| H | 3.42054600  | -1.53974700 | 4.46266500  |
| H | 4.03457900  | -0.30771900 | 2.42411800  |
| S | -2.36364800 | -0.31362800 | -0.31698000 |
| O | -2.13530700 | -0.43958900 | -1.78039500 |
| O | -1.97092500 | -1.52250900 | 0.46739500  |
| O | -1.77710100 | 0.94092700  | 0.27580200  |
| H | 0.10266500  | 0.42522600  | -2.20611300 |
| C | -4.14656500 | -0.13170600 | -0.10958100 |
| C | -4.65871200 | 0.55046200  | 0.99487000  |
| C | -5.01369400 | -0.71899300 | -1.03155600 |
| C | -6.03855100 | 0.63873400  | 1.17424900  |
| H | -3.97453700 | 1.01498400  | 1.69764400  |
| C | -6.39171100 | -0.62542800 | -0.84089700 |
| H | -4.60179900 | -1.23311300 | -1.89384900 |
| C | -6.92722200 | 0.05380200  | 0.26180000  |
| H | -6.43332100 | 1.17192700  | 2.03706400  |
| H | -7.06387700 | -1.08584100 | -1.56245400 |
| C | -8.42231200 | 0.17937100  | 0.44456900  |
| H | -8.95061300 | -0.69009200 | 0.03817300  |
| H | -8.69093300 | 0.27385700  | 1.50241700  |
| H | -8.81551800 | 1.06665000  | -0.07050200 |

B3LYP/6-31G\*

Thermal correction to Gibbs Free Energy = 0.432802

Sum of electronic and thermal Free Energies = -1949.872638

M06-2X/6-311++G\*\*

Energy = -1950.1186779

No imaginary frequency

**in4-HOTs**

|   |             |             |             |
|---|-------------|-------------|-------------|
| C | -3.64233900 | 1.85042000  | 0.62967000  |
| C | -4.30965100 | 3.01216100  | 1.01249000  |
| C | -3.94061100 | 3.68811800  | 2.17666700  |
| C | -2.89417300 | 3.19473100  | 2.95651100  |
| C | -2.22477000 | 2.03301200  | 2.57602200  |
| C | -2.59344100 | 1.33709100  | 1.41154700  |
| C | -1.89971300 | 0.06150000  | 1.09426200  |
| C | -1.66823300 | -0.86011100 | 2.04211300  |
| C | -0.98207600 | -2.17770400 | 1.89139200  |
| O | -0.30839700 | -2.46929200 | 3.01104900  |
| O | -1.07732000 | -2.90344300 | 0.92467400  |
| C | 0.48726900  | -3.67744700 | 2.94549100  |
| H | -3.95046300 | 1.34006500  | -0.27553500 |
| H | -5.12316800 | 3.38770100  | 0.39817300  |
| H | -4.46090500 | 4.59562200  | 2.46974700  |
| H | -2.58892300 | 3.71847000  | 3.85798700  |
| H | -1.39334300 | 1.66748100  | 3.17106900  |
| H | 0.97015100  | -3.74981400 | 3.92034700  |
| H | -0.15862600 | -4.54179200 | 2.77015200  |
| H | 1.22255100  | -3.58618400 | 2.14221900  |
| C | -1.78955700 | 1.50057300  | -2.14157800 |
| C | -1.46931200 | 2.69659300  | -2.78673800 |
| C | -0.42526200 | 3.49392000  | -2.31882000 |
| C | 0.30763800  | 3.08974900  | -1.20189400 |
| C | -0.00011900 | 1.89766900  | -0.54677500 |
| C | -1.05375200 | 1.11774100  | -1.02346900 |
| N | -1.35262900 | -0.15968600 | -0.29362900 |
| C | -2.10394900 | -1.14858400 | -1.12542900 |
| C | -3.46257900 | -1.36944400 | -0.92653500 |
| C | -4.12786400 | -2.27567100 | -1.75561800 |
| C | -3.43403800 | -2.94627100 | -2.76225300 |
| C | -2.06711900 | -2.71734100 | -2.93475200 |
| C | -1.38785800 | -1.81401300 | -2.11828000 |
| H | -2.59242800 | 0.87823300  | -2.51776900 |
| H | -2.03939300 | 2.99734900  | -3.66093700 |
| H | -0.17809100 | 4.42139800  | -2.82743200 |
| H | 1.13319200  | 3.69482100  | -0.83916200 |
| H | 0.58746900  | 1.55608400  | 0.29704400  |
| H | -0.37063300 | -0.56195600 | -0.09297600 |
| H | -3.99769700 | -0.87575400 | -0.12322300 |

|   |             |             |             |
|---|-------------|-------------|-------------|
| H | -5.18748700 | -2.45896900 | -1.60261200 |
| H | -3.95352900 | -3.65429300 | -3.40172200 |
| H | -1.51485300 | -3.25310700 | -3.70105000 |
| H | -0.31553100 | -1.66079000 | -2.22339200 |
| S | 2.13260200  | -1.45807400 | -0.26226500 |
| O | 2.54225600  | -2.70266400 | 0.41706500  |
| O | 1.76894400  | -1.55609500 | -1.69689300 |
| O | 1.04609700  | -0.71621600 | 0.52296100  |
| H | -2.03284600 | -0.64016600 | 3.04058500  |
| C | 3.54611100  | -0.34305100 | -0.17574900 |
| C | 3.73567900  | 0.61875100  | -1.16772600 |
| C | 4.43443900  | -0.43137700 | 0.89730500  |
| C | 4.81172700  | 1.50192000  | -1.07382900 |
| H | 3.05608900  | 0.65276300  | -2.01288000 |
| C | 5.50469500  | 0.45698800  | 0.97935400  |
| H | 4.29201600  | -1.20511400 | 1.64454800  |
| C | 5.70851200  | 1.44075600  | 0.00070100  |
| H | 4.96443700  | 2.24349400  | -1.85533500 |
| H | 6.20009800  | 0.38002800  | 1.81272900  |
| C | 6.85987500  | 2.41328800  | 0.11158500  |
| H | 7.76634300  | 1.92151500  | 0.48206100  |
| H | 7.09456300  | 2.86899800  | -0.85595300 |
| H | 6.62796400  | 3.22877700  | 0.81011300  |

B3LYP/6-31G\*

Thermal correction to Gibbs Free Energy = 0.431297

Sum of electronic and thermal Free Energies = -1949.883733

M06-2X/6-311++G\*\*

Energy = -1950.1284761

No imaginary frequency

### ts3-HOTs

|   |             |             |             |
|---|-------------|-------------|-------------|
| C | -3.54183200 | 1.92495300  | 0.60871100  |
| C | -4.19517700 | 3.09473500  | 0.99092400  |
| C | -3.84064400 | 3.74861800  | 2.17223200  |
| C | -2.82324900 | 3.22407100  | 2.97002300  |
| C | -2.16918200 | 2.05315000  | 2.59073400  |
| C | -2.52333900 | 1.37957300  | 1.40911200  |
| C | -1.85341800 | 0.09174300  | 1.08215800  |
| C | -1.66133300 | -0.83718900 | 2.03496200  |
| C | -1.01621500 | -2.17417000 | 1.89808900  |
| O | -0.37155200 | -2.48487100 | 3.03455600  |
| O | -1.10255600 | -2.90253400 | 0.93280300  |
| C | 0.37947400  | -3.71953700 | 2.98607900  |
| H | -3.83513300 | 1.43246700  | -0.31133100 |
| H | -4.98563900 | 3.49481800  | 0.36207300  |

|   |             |             |             |
|---|-------------|-------------|-------------|
| H | -4.34908800 | 4.66313900  | 2.46447300  |
| H | -2.52896800 | 3.73048100  | 3.88504700  |
| H | -1.36034500 | 1.66330300  | 3.20144000  |
| H | 0.85167600  | -3.80290300 | 3.96540200  |
| H | -0.29337800 | -4.56304300 | 2.81012500  |
| H | 1.12477900  | -3.66452500 | 2.18912300  |
| C | -1.67342200 | 1.47659800  | -2.20463600 |
| C | -1.32630800 | 2.65971300  | -2.86011200 |
| C | -0.32590100 | 3.48487400  | -2.34825200 |
| C | 0.33525500  | 3.11951200  | -1.17448300 |
| C | 0.00082000  | 1.93918000  | -0.51245500 |
| C | -1.00976700 | 1.12580300  | -1.03054600 |
| N | -1.32536500 | -0.13493500 | -0.29789800 |
| C | -2.09525500 | -1.11471100 | -1.10948700 |
| C | -3.45357700 | -1.32679800 | -0.88743900 |
| C | -4.14442500 | -2.23216500 | -1.69585400 |
| C | -3.47982000 | -2.91355200 | -2.71462700 |
| C | -2.11598200 | -2.69327500 | -2.91830800 |
| C | -1.41309300 | -1.79267200 | -2.11926200 |
| H | -2.44564800 | 0.83710500  | -2.61419700 |
| H | -1.84384300 | 2.92976400  | -3.77619200 |
| H | -0.05826300 | 4.40300100  | -2.86345700 |
| H | 1.12455700  | 3.74740700  | -0.77160000 |
| H | 0.53263500  | 1.63919200  | 0.38235100  |
| H | -0.22926400 | -0.56933800 | -0.07461100 |
| H | -3.97060400 | -0.82134900 | -0.07943800 |
| H | -5.20235800 | -2.40438200 | -1.51905000 |
| H | -4.01865000 | -3.62028500 | -3.33944100 |
| H | -1.58453600 | -3.23404500 | -3.69595200 |
| H | -0.34503400 | -1.64631700 | -2.25691900 |
| S | 2.09619000  | -1.50199200 | -0.32476300 |
| O | 2.46484400  | -2.73715000 | 0.38538100  |
| O | 1.76169200  | -1.59779500 | -1.76120000 |
| O | 0.98249700  | -0.73892900 | 0.43910800  |
| H | -2.02807500 | -0.60522300 | 3.02969400  |
| C | 3.49793200  | -0.38303200 | -0.18845000 |
| C | 3.69236800  | 0.60375500  | -1.15488100 |
| C | 4.37502200  | -0.49954200 | 0.89062500  |
| C | 4.76606800  | 1.48478500  | -1.02813500 |
| H | 3.01970200  | 0.66148400  | -2.00414900 |
| C | 5.44307100  | 0.38814000  | 1.00428600  |
| H | 4.22581300  | -1.29154200 | 1.61690000  |
| C | 5.65351600  | 1.39655000  | 0.05274000  |
| H | 4.92385500  | 2.24698200  | -1.78820000 |
| H | 6.13081400  | 0.29097900  | 1.84163800  |

|   |            |            |             |
|---|------------|------------|-------------|
| C | 6.80117900 | 2.36842800 | 0.19891400  |
| H | 7.69787000 | 1.87455900 | 0.58926200  |
| H | 7.05970000 | 2.83088700 | -0.75919100 |
| H | 6.54994100 | 3.17882100 | 0.89654300  |

B3LYP/6-31G\*

Thermal correction to Gibbs Free Energy = 0.427864

Sum of electronic and thermal Free Energies = -1949.887997

M06-2X/6-311++G\*\*

Energy = -1950.1287673

Number of Imaginary Frequencies = 1

Lowest Frequency = 559.22i

**in5-HOTs**

|    |             |             |             |
|----|-------------|-------------|-------------|
| C  | -1.60875800 | -3.71680500 | 2.30706800  |
| C  | -1.75485400 | -4.15460100 | 3.62071200  |
| C  | -1.97054400 | -3.23194900 | 4.64844100  |
| C  | -2.03068200 | -1.86753900 | 4.35870700  |
| C  | -1.86806600 | -1.42203600 | 3.04726200  |
| C  | -1.66099700 | -2.34494900 | 2.00935800  |
| C  | -1.41886900 | -1.85054100 | 0.62433900  |
| C  | -0.46250900 | -0.85016700 | 0.49923300  |
| C  | -0.16978700 | 0.04200000  | -0.56699800 |
| O  | -1.11873100 | 0.21564000  | -1.51388400 |
| O  | 0.86996600  | 0.74098700  | -0.66462000 |
| C  | -0.76063200 | 1.01066000  | -2.67206800 |
| H  | -1.43469100 | -4.43493800 | 1.51217800  |
| H  | -1.69656600 | -5.21615300 | 3.84395500  |
| H  | -2.09074600 | -3.57726400 | 5.67165100  |
| H  | -2.20561500 | -1.14731200 | 5.15277300  |
| H  | -1.92786600 | -0.36275700 | 2.81416900  |
| H  | -1.64188200 | 0.98260100  | -3.31145300 |
| H  | -0.52218000 | 2.03204100  | -2.37116700 |
| H  | 0.09526800  | 0.55845700  | -3.17499700 |
| S  | 4.01025000  | 2.68746600  | 1.13821600  |
| O  | 2.77036600  | 2.69856000  | 0.25341700  |
| C  | 5.16763200  | -2.30356900 | 0.08301300  |
| S  | 3.58696000  | -1.78339400 | -0.75374700 |
| O  | 3.92974800  | -0.62709700 | -1.60981500 |
| O  | 2.74213400  | -1.27504500 | 0.43057300  |
| F  | 5.73748000  | -1.25583300 | 0.67905700  |
| F  | 4.90882400  | -3.24401800 | 0.99408300  |
| F  | 6.00352300  | -2.79664800 | -0.83512000 |
| Cu | 2.60419400  | 0.66365200  | 0.24084000  |
| O  | 4.07410600  | 3.63285400  | 2.23774700  |
| C  | 5.41157800  | 3.09583900  | -0.02250100 |

|   |             |             |             |
|---|-------------|-------------|-------------|
| F | 5.26575100  | 4.34758100  | -0.45728400 |
| F | 6.56668400  | 2.97971000  | 0.62933700  |
| F | 5.39126100  | 2.25725600  | -1.05621000 |
| O | 4.18283800  | 1.20855500  | 1.44459000  |
| O | 3.04929200  | -2.99934100 | -1.36409700 |
| C | -3.57407200 | -4.41835400 | -0.60756000 |
| C | -4.81417700 | -5.02247600 | -0.41213700 |
| C | -5.85167900 | -4.31874000 | 0.20630700  |
| C | -5.64303200 | -3.00241500 | 0.61932300  |
| C | -4.40763700 | -2.38419800 | 0.41939600  |
| C | -3.36790900 | -3.09958400 | -0.18265600 |
| N | -2.08496100 | -2.47399100 | -0.40504900 |
| C | -1.54993300 | -2.56921000 | -1.73988500 |
| C | -0.21844100 | -2.95006200 | -1.93971100 |
| C | 0.28201400  | -3.05839500 | -3.23729200 |
| C | -0.54492600 | -2.81374600 | -4.33705600 |
| C | -1.87910600 | -2.45283500 | -4.13213400 |
| C | -2.38348000 | -2.32379900 | -2.83803300 |
| H | -2.76519900 | -4.96230800 | -1.08544100 |
| H | -4.96700500 | -6.04742900 | -0.73844800 |
| H | -6.81702200 | -4.79302300 | 0.35875400  |
| H | -6.44445600 | -2.43934800 | 1.08858600  |
| H | -4.26666200 | -1.35288900 | 0.72221600  |
| H | 0.17422200  | -0.70710700 | 1.36194000  |
| H | 0.43680500  | -3.14602700 | -1.09818400 |
| H | 1.32172900  | -3.33927500 | -3.37012800 |
| H | -0.15354000 | -2.90894400 | -5.34598100 |
| H | -2.53179300 | -2.26457700 | -4.98039100 |
| H | -3.41551500 | -2.03046300 | -2.67425600 |
| S | -3.84288900 | 1.75024100  | 0.61373100  |
| O | -3.69176600 | 1.00521400  | -0.83113000 |
| O | -4.97764300 | 1.12461400  | 1.28576900  |
| O | -2.51488600 | 1.76771400  | 1.23749200  |
| H | -2.75587400 | 0.70408300  | -0.94247700 |
| C | -4.29265600 | 3.40768000  | 0.14115300  |
| C | -3.30597000 | 4.39317100  | 0.08160500  |
| C | -5.62590100 | 3.69680500  | -0.15786600 |
| C | -3.66722800 | 5.68562500  | -0.29432600 |
| H | -2.28152200 | 4.15448600  | 0.34708900  |
| C | -5.96446000 | 4.99368300  | -0.53539700 |
| H | -6.38185600 | 2.92284200  | -0.07885500 |
| C | -4.99458300 | 6.00495900  | -0.61465900 |
| H | -2.90578500 | 6.46040300  | -0.33161600 |
| H | -7.00106000 | 5.22768400  | -0.76426800 |
| C | -5.37004300 | 7.40138800  | -1.04959700 |



|   |             |            |             |
|---|-------------|------------|-------------|
| H | -6.39317100 | 7.65267200 | -0.75172800 |
| H | -4.69562800 | 8.14976900 | -0.62143600 |
| H | -5.31528400 | 7.49907800 | -2.14203400 |

B3LYP/6-31G\* (Lan12DZ for Cu)

Thermal correction to Gibbs Free Energy = 0.455971

Sum of electronic and thermal Free Energies = -4068.892481

M06-2X/6-311++G\*\* (Lan12DZ for Cu)

Energy = -4069.2315952

No imaginary frequency

#### ts4-HOTs

|    |             |             |             |
|----|-------------|-------------|-------------|
| C  | 0.27137900  | 2.62560000  | 3.16821900  |
| C  | 0.41723400  | 2.63129800  | 4.55359500  |
| C  | 1.21811200  | 1.67149300  | 5.17804700  |
| C  | 1.86885800  | 0.70580000  | 4.40949900  |
| C  | 1.72383900  | 0.69147700  | 3.02129500  |
| C  | 0.92155300  | 1.65326600  | 2.39057500  |
| C  | 0.69220100  | 1.60061500  | 0.92159900  |
| C  | 0.28600000  | 0.47171100  | 0.30965600  |
| C  | -0.12536900 | 0.34240300  | -1.14504200 |
| O  | 1.02476200  | 0.08149600  | -1.92816600 |
| O  | -1.12243400 | -0.46200600 | -1.39955200 |
| C  | 0.78976800  | -0.51914700 | -3.21638500 |
| H  | -0.36549400 | 3.36390400  | 2.68956300  |
| H  | -0.10064700 | 3.38052200  | 5.14595400  |
| H  | 1.33190000  | 1.67753500  | 6.25862100  |
| H  | 2.49757700  | -0.04041300 | 4.88683500  |
| H  | 2.25058700  | -0.05029800 | 2.42884600  |
| H  | 1.77997500  | -0.67653500 | -3.64646600 |
| H  | 0.25434000  | -1.46452900 | -3.11335600 |
| H  | 0.21106700  | 0.16490200  | -3.84505700 |
| S  | -2.71167300 | -2.71720900 | 1.72352800  |
| O  | -1.58923000 | -2.50709600 | 0.71513000  |
| C  | -6.11884000 | 0.81088900  | -0.73723900 |
| S  | -4.49132500 | 0.47778600  | -1.57739800 |
| O  | -4.43996400 | -0.97785100 | -1.82439500 |
| O  | -3.49008900 | 0.82806000  | -0.45909900 |
| F  | -6.23545700 | 0.04980900  | 0.35107400  |
| F  | -6.19254500 | 2.09806700  | -0.38539100 |
| F  | -7.11501100 | 0.52896100  | -1.58171600 |
| Cu | -2.48192500 | -0.83776900 | -0.09599000 |
| O  | -2.34859600 | -3.05102600 | 3.08929300  |
| C  | -3.67290400 | -4.16051800 | 1.03906000  |
| F  | -2.92867600 | -5.26348100 | 1.12372900  |
| F  | -4.78963000 | -4.31962600 | 1.74746400  |

|   |             |             |             |
|---|-------------|-------------|-------------|
| F | -3.97933300 | -3.92504700 | -0.23568400 |
| O | -3.60809800 | -1.51532400 | 1.48805600  |
| O | -4.42819800 | 1.39840400  | -2.71487500 |
| C | 1.51054900  | 5.04525400  | 0.99695300  |
| C | 2.46949300  | 5.95798700  | 1.43616900  |
| C | 3.80868900  | 5.57219100  | 1.53453400  |
| C | 4.18847300  | 4.27511800  | 1.18382100  |
| C | 3.23885700  | 3.35533300  | 0.73411200  |
| C | 1.90146500  | 3.74858700  | 0.65164500  |
| N | 0.89801500  | 2.81320400  | 0.18142900  |
| C | 0.40917200  | 2.93168900  | -1.08966100 |
| C | -0.65228200 | 2.02174500  | -1.50415700 |
| C | -1.17691900 | 2.17305500  | -2.85117300 |
| C | -0.64230100 | 3.07358200  | -3.73098900 |
| C | 0.42280800  | 3.90599300  | -3.29926500 |
| C | 0.93812600  | 3.85471900  | -2.01696300 |
| H | 0.46465000  | 5.32922300  | 0.92471100  |
| H | 2.16799900  | 6.96538900  | 1.70841400  |
| H | 4.55360800  | 6.28202200  | 1.88297800  |
| H | 5.22902100  | 3.97172000  | 1.25210100  |
| H | 3.53919000  | 2.35342000  | 0.44159500  |
| H | 0.21637400  | -0.44641100 | 0.88582800  |
| H | -1.46838800 | 1.95567500  | -0.77569000 |
| H | -2.02844000 | 1.55706300  | -3.12163300 |
| H | -1.03177200 | 3.17079100  | -4.73913000 |
| H | 0.85622800  | 4.61454900  | -4.00094700 |
| H | 1.75008700  | 4.51068000  | -1.73126000 |
| S | 4.25578500  | -0.91582400 | -0.16499300 |
| O | 3.17852300  | -1.43507600 | -1.25858500 |
| O | 4.58655900  | 0.48429600  | -0.46097700 |
| O | 3.79000200  | -1.26555000 | 1.17898700  |
| H | 2.40569700  | -0.80391000 | -1.30357300 |
| C | 5.62562100  | -1.96402100 | -0.59995200 |
| C | 5.75056700  | -3.21196500 | 0.01312900  |
| C | 6.55815400  | -1.51817800 | -1.53690100 |
| C | 6.82617800  | -4.02591700 | -0.33346100 |
| H | 5.02465300  | -3.52767500 | 0.75462200  |
| C | 7.62798100  | -2.34723800 | -1.86813000 |
| H | 6.45206100  | -0.53513600 | -1.98297700 |
| C | 7.77604200  | -3.61163900 | -1.27951500 |
| H | 6.93311900  | -4.99729000 | 0.14268500  |
| H | 8.36306700  | -2.00479100 | -2.59202700 |
| C | 8.92147900  | -4.51635300 | -1.66627800 |
| H | 9.76741600  | -3.94620900 | -2.06291800 |
| H | 9.27502500  | -5.10285500 | -0.81175400 |

H 8.61228700 -5.22825800 -2.44302800  
 B3LYP/6-31G\* (Lan12DZ for Cu)  
 Thermal correction to Gibbs Free Energy = 0.456854  
 Sum of electronic and thermal Free Energies = -4068.835011  
 M06-2X/6-311++G\*\* (Lan12DZ for Cu)  
 Energy = -4069.1770854  
 Number of Imaginary Frequencies = 1  
 Lowest Frequency = 334.77i

**in6-HOTs**

|    |             |             |             |
|----|-------------|-------------|-------------|
| C  | 0.52987800  | 3.41231000  | 2.44979700  |
| C  | 0.73129800  | 3.88589600  | 3.74440700  |
| C  | 1.63256500  | 3.23885500  | 4.59420200  |
| C  | 2.32710700  | 2.11597600  | 4.14355500  |
| C  | 2.12910700  | 1.63482400  | 2.84748200  |
| C  | 1.22860000  | 2.28337000  | 1.99155700  |
| C  | 0.94564900  | 1.74059200  | 0.63507900  |
| C  | 0.43870400  | 0.51423600  | 0.42837100  |
| C  | 0.00529300  | 0.00176900  | -0.93643600 |
| O  | 1.21836400  | -0.53180600 | -1.54647600 |
| O  | -0.95919900 | -0.91922400 | -0.92893400 |
| C  | 1.02558600  | -1.42843800 | -2.65285000 |
| H  | -0.19114600 | 3.90206300  | 1.80104400  |
| H  | 0.17659100  | 4.75258900  | 4.09305300  |
| H  | 1.78857700  | 3.60843600  | 5.60408900  |
| H  | 3.03128400  | 1.60974100  | 4.79781800  |
| H  | 2.68747800  | 0.77198500  | 2.49743700  |
| H  | 2.02344100  | -1.77854500 | -2.92423500 |
| H  | 0.38646100  | -2.26706800 | -2.37083200 |
| H  | 0.58183600  | -0.89530700 | -3.50148200 |
| S  | -3.65081000 | -3.24953800 | 1.09054100  |
| O  | -2.44848600 | -3.15873800 | 0.17006600  |
| C  | -5.43122500 | 1.68597800  | 0.45919800  |
| S  | -3.96479800 | 1.32330000  | -0.62898000 |
| O  | -4.36449800 | 0.21931000  | -1.52145100 |
| O  | -2.92029300 | 0.83439000  | 0.39024300  |
| F  | -5.83328900 | 0.57538700  | 1.07526300  |
| F  | -5.10072500 | 2.60372200  | 1.37223100  |
| F  | -6.42826900 | 2.15799400  | -0.29591900 |
| Cu | -2.50079800 | -1.07472800 | 0.15368400  |
| O  | -3.60743000 | -4.19130100 | 2.19577300  |
| C  | -5.04827000 | -3.77919900 | -0.02184300 |
| F  | -4.82351200 | -5.02225300 | -0.45098000 |
| F  | -6.19334900 | -3.74377800 | 0.65866200  |
| F  | -5.12347600 | -2.95459700 | -1.06669200 |

|   |             |             |             |
|---|-------------|-------------|-------------|
| O | -3.95449800 | -1.79289200 | 1.40272600  |
| O | -3.57533100 | 2.60686700  | -1.22246600 |
| C | 1.87202500  | 4.97101400  | -0.30803000 |
| C | 2.87451700  | 5.93532600  | -0.20027800 |
| C | 4.21577400  | 5.54787700  | -0.14893000 |
| C | 4.55582900  | 4.19501300  | -0.21220200 |
| C | 3.56325500  | 3.21938800  | -0.32670500 |
| C | 2.22764800  | 3.62208600  | -0.36914500 |
| N | 1.19088100  | 2.61057000  | -0.49203200 |
| C | 0.60538600  | 2.37845800  | -1.68063500 |
| C | -0.43471600 | 1.31765300  | -1.73791300 |
| C | -1.05021600 | 1.07446200  | -3.06036200 |
| C | -0.71979600 | 1.81117400  | -4.15036700 |
| C | 0.28700200  | 2.82084400  | -4.03180800 |
| C | 0.93643000  | 3.10418700  | -2.85293600 |
| H | 0.82536200  | 5.25824800  | -0.34119700 |
| H | 2.60509300  | 6.98625700  | -0.15002000 |
| H | 4.99406100  | 6.30043800  | -0.05978600 |
| H | 5.59733400  | 3.88966100  | -0.17666800 |
| H | 3.82484700  | 2.16659800  | -0.39095900 |
| H | 0.29676200  | -0.15448100 | 1.27104800  |
| H | -1.25851900 | 1.66302400  | -1.08260400 |
| H | -1.81358900 | 0.30378100  | -3.09413400 |
| H | -1.19932100 | 1.64437900  | -5.10926200 |
| H | 0.55860700  | 3.39026300  | -4.91733400 |
| H | 1.69786400  | 3.87226300  | -2.81871800 |
| S | 4.37163400  | -1.05396000 | 0.24321600  |
| O | 3.05886600  | -1.89052400 | -0.17913800 |
| O | 4.59770500  | -0.00011600 | -0.75695700 |
| O | 4.27406500  | -0.68028700 | 1.65653600  |
| H | 2.37194500  | -1.27978000 | -0.59377200 |
| C | 5.61470300  | -2.31771600 | 0.07463100  |
| C | 5.90691900  | -3.13830500 | 1.16545000  |
| C | 6.28175200  | -2.46481700 | -1.14184600 |
| C | 6.87713000  | -4.12734900 | 1.02294400  |
| H | 5.39079100  | -2.99173100 | 2.10800200  |
| C | 7.25109200  | -3.45852900 | -1.26308800 |
| H | 6.05497500  | -1.80054700 | -1.96892200 |
| C | 7.55939300  | -4.30688900 | -0.18984300 |
| H | 7.11257000  | -4.76753900 | 1.86941800  |
| H | 7.78064900  | -3.57424100 | -2.20533200 |
| C | 8.58980500  | -5.40085900 | -0.33870200 |
| H | 9.29582800  | -5.18023300 | -1.14547400 |
| H | 9.16015000  | -5.54250400 | 0.58542100  |
| H | 8.11075300  | -6.36031200 | -0.57461800 |

B3LYP/6-31G\* (Lan12DZ for Cu)

Thermal correction to Gibbs Free Energy = 0.456803

Sum of electronic and thermal Free Energies = -4068.837437

M06-2X/6-311++G\*\* (Lan12DZ for Cu)

Energy = -4069.1850527

No imaginary frequency

**in7-HOTs**

|    |             |             |             |
|----|-------------|-------------|-------------|
| C  | -2.91729900 | -3.14043900 | 2.91419500  |
| C  | -3.67051600 | -3.03749300 | 4.08180500  |
| C  | -3.97713800 | -1.78036600 | 4.60897000  |
| C  | -3.52411500 | -0.62887200 | 3.96355900  |
| C  | -2.77136400 | -0.72504300 | 2.79225000  |
| C  | -2.46197000 | -1.98547100 | 2.25774400  |
| C  | -1.58776900 | -2.07974100 | 1.05979200  |
| C  | -0.41514400 | -1.43046300 | 0.96886100  |
| C  | 0.53252400  | -1.57537100 | -0.21156600 |
| O  | 0.05037400  | -0.60486300 | -1.18348600 |
| O  | 1.82904400  | -1.50065200 | 0.05372100  |
| C  | 0.91578700  | -0.25596800 | -2.27603900 |
| H  | -2.66291500 | -4.12181600 | 2.52381100  |
| H  | -4.00888300 | -3.93869400 | 4.58571000  |
| H  | -4.56282900 | -1.70099700 | 5.52071200  |
| H  | -3.75627400 | 0.35204000  | 4.36842200  |
| H  | -2.43138000 | 0.17582100  | 2.28907800  |
| H  | 0.59831100  | 0.73291300  | -2.61184900 |
| H  | 1.95614500  | -0.22550000 | -1.95463800 |
| H  | 0.80823800  | -0.98359200 | -3.08977000 |
| S  | 2.41881300  | 1.90092000  | 2.45341400  |
| O  | 1.43156500  | 0.89388500  | 1.86567700  |
| C  | 5.34175900  | 0.25942000  | -1.56695900 |
| S  | 5.13737500  | -1.44058500 | -0.83856200 |
| O  | 4.16929500  | -2.09361300 | -1.73308200 |
| O  | 4.57288000  | -1.08387700 | 0.53970500  |
| F  | 4.16135800  | 0.92670100  | -1.47868200 |
| F  | 6.26490100  | 0.96104700  | -0.91259100 |
| F  | 5.67802900  | 0.18367700  | -2.85702300 |
| Cu | 2.88106300  | -0.22708800 | 0.97032800  |
| O  | 2.19968800  | 2.33296600  | 3.82242100  |
| C  | 2.23073400  | 3.39734400  | 1.35718400  |
| F  | 1.02446200  | 3.92715300  | 1.52610900  |
| F  | 3.16357700  | 4.29360600  | 1.68403400  |
| F  | 2.39467800  | 3.03066800  | 0.08490200  |
| O  | 3.76145200  | 1.31492300  | 2.07628800  |
| O  | 6.47940400  | -2.00402500 | -0.73067600 |

|   |             |             |             |
|---|-------------|-------------|-------------|
| C | -4.05203100 | -4.33141600 | -0.09751800 |
| C | -5.42512100 | -4.47314900 | -0.30162400 |
| C | -6.20191000 | -3.36107300 | -0.63450300 |
| C | -5.60417600 | -2.10606000 | -0.76874200 |
| C | -4.23067500 | -1.95254400 | -0.57340900 |
| C | -3.46668500 | -3.07135500 | -0.23647400 |
| N | -2.03599900 | -2.90895200 | -0.04038100 |
| C | -1.17154700 | -3.33093700 | -0.98336500 |
| C | 0.27673700  | -3.06503000 | -0.75733900 |
| C | 1.20845400  | -3.47511500 | -1.83491100 |
| C | 0.76404100  | -4.12576100 | -2.94066600 |
| C | -0.63568300 | -4.37422200 | -3.09424100 |
| C | -1.58095700 | -3.99100700 | -2.16841200 |
| H | -3.43953700 | -5.18731600 | 0.17044400  |
| H | -5.88585400 | -5.45056800 | -0.19293700 |
| H | -7.27128500 | -3.47316200 | -0.78802400 |
| H | -6.20498400 | -1.24014500 | -1.03055600 |
| H | -3.75546500 | -0.98188200 | -0.68283200 |
| H | -0.10617800 | -0.76151600 | 1.76331700  |
| H | 0.57203800  | -3.62596800 | 0.14899400  |
| H | 2.25589100  | -3.22001800 | -1.68508700 |
| H | 1.45132600  | -4.43399200 | -3.72174600 |
| H | -0.97862400 | -4.87487800 | -3.99664500 |
| H | -2.63023800 | -4.18201000 | -2.35080900 |
| S | -1.84958700 | 2.31993600  | -0.39048600 |
| O | -2.16126800 | 0.87377500  | -1.07150900 |
| O | -2.06426100 | 2.21901000  | 1.05440000  |
| O | -0.56760500 | 2.79606100  | -0.91408800 |
| H | -1.31490800 | 0.32752800  | -1.05168800 |
| C | -3.17952000 | 3.27185700  | -1.10039900 |
| C | -3.01478500 | 3.84019600  | -2.36556800 |
| C | -4.35468200 | 3.45708300  | -0.37301400 |
| C | -4.05311200 | 4.59248200  | -2.90747300 |
| H | -2.08131500 | 3.70895200  | -2.90250500 |
| C | -5.38329700 | 4.21425400  | -0.93271200 |
| H | -4.44832700 | 3.03015100  | 0.61960400  |
| C | -5.25277500 | 4.78798300  | -2.20475700 |
| H | -3.92787500 | 5.04428200  | -3.88840300 |
| H | -6.29852200 | 4.36968700  | -0.36707900 |
| C | -6.37811900 | 5.58981600  | -2.81427700 |
| H | -7.07745100 | 5.94463100  | -2.05089300 |
| H | -5.99875300 | 6.46046500  | -3.36006400 |
| H | -6.95029100 | 4.98385300  | -3.52929700 |

B3LYP/6-31G\* (Lanl2DZ for Cu)

Thermal correction to Gibbs Free Energy = 0.459928

Sum of electronic and thermal Free Energies = -4068.826531

M06-2X/6-311++G\*\* (Lanl2DZ for Cu)

Energy = -4069.1861968

No imaginary frequency

**ts5-HOTs**

|    |             |             |             |
|----|-------------|-------------|-------------|
| C  | 1.90146500  | 2.19423200  | 3.37969000  |
| C  | 2.39790700  | 1.86924400  | 4.63989700  |
| C  | 2.71148200  | 0.54231700  | 4.94750000  |
| C  | 2.52235500  | -0.45712100 | 3.99222700  |
| C  | 2.02240900  | -0.14200700 | 2.72748200  |
| C  | 1.71177100  | 1.19105000  | 2.41551900  |
| C  | 1.10354000  | 1.49783100  | 1.09651800  |
| C  | -0.02067200 | 0.88251400  | 0.67848100  |
| C  | -0.67441500 | 1.19377500  | -0.61986100 |
| O  | 0.29010300  | 0.29133000  | -1.79839900 |
| O  | -1.90381800 | 0.91097400  | -0.82932000 |
| C  | -0.41805000 | -0.59864800 | -2.68514500 |
| H  | 1.63963300  | 3.22412200  | 3.15362100  |
| H  | 2.53031300  | 2.64920600  | 5.38449300  |
| H  | 3.09714200  | 0.29038800  | 5.93159400  |
| H  | 2.76248900  | -1.49056100 | 4.22446600  |
| H  | 1.89204300  | -0.92386700 | 1.98429300  |
| H  | 0.15944100  | -1.52227900 | -2.76340900 |
| H  | -1.40912900 | -0.80651700 | -2.27724600 |
| H  | -0.51509500 | -0.11339000 | -3.66100500 |
| S  | -2.79072100 | -2.30393200 | 1.25001900  |
| O  | -2.53372400 | -0.81872700 | 1.60915900  |
| C  | -6.98991500 | -0.26275400 | -0.89039600 |
| S  | -5.89009200 | 1.03962000  | -0.13470500 |
| O  | -4.70401500 | 1.13774000  | -1.08788500 |
| O  | -5.28653300 | 0.38362900  | 1.09035300  |
| F  | -6.28069800 | -1.35820600 | -1.14302700 |
| F  | -7.97393300 | -0.54663800 | -0.03930600 |
| F  | -7.50459800 | 0.21114000  | -2.02678300 |
| Cu | -3.41417800 | 0.18642400  | 0.18054800  |
| O  | -3.28877100 | -3.10816600 | 2.35623600  |
| C  | -1.05332800 | -2.88940000 | 0.90977600  |
| F  | -0.29816900 | -2.69329800 | 1.99149000  |
| F  | -1.05975500 | -4.17733000 | 0.58806200  |
| F  | -0.55452500 | -2.17464800 | -0.11117300 |
| O  | -3.49147100 | -2.31343100 | -0.05749500 |
| O  | -6.70350200 | 2.23024300  | 0.04720300  |
| C  | 3.50784000  | 4.03437200  | 0.97440900  |
| C  | 4.85118800  | 4.33520800  | 1.20222300  |

|   |             |             |             |
|---|-------------|-------------|-------------|
| C | 5.83533300  | 3.37511000  | 0.95218700  |
| C | 5.47858400  | 2.11427300  | 0.46893200  |
| C | 4.13890200  | 1.79876900  | 0.23360600  |
| C | 3.17035400  | 2.76696100  | 0.49605600  |
| N | 1.76935300  | 2.44944900  | 0.23903000  |
| C | 1.17903400  | 2.91686800  | -0.86949800 |
| C | -0.27719000 | 2.62616200  | -1.06631400 |
| C | -0.86132100 | 3.03029500  | -2.37271400 |
| C | -0.15261100 | 3.74945700  | -3.27034800 |
| C | 1.21783400  | 4.07606700  | -2.98867400 |
| C | 1.86809600  | 3.68751500  | -1.84389100 |
| H | 2.73269800  | 4.76976500  | 1.17049500  |
| H | 5.12536900  | 5.31643500  | 1.57827600  |
| H | 6.87971500  | 3.61224700  | 1.13373600  |
| H | 6.23895800  | 1.36532100  | 0.26805300  |
| H | 3.83585000  | 0.82934500  | -0.15281200 |
| H | -0.48511000 | 0.12938800  | 1.30247500  |
| H | -0.79574900 | 3.23892400  | -0.29734100 |
| H | -1.89026800 | 2.72900800  | -2.54090200 |
| H | -0.59005000 | 4.06181700  | -4.21289800 |
| H | 1.77850300  | 4.63848800  | -3.73090900 |
| H | 2.91303700  | 3.92724800  | -1.70010200 |
| S | 2.68977200  | -2.11509200 | -0.89289100 |
| O | 2.41870800  | -0.59190200 | -0.96381500 |
| O | 2.44989100  | -2.62672500 | 0.47091000  |
| O | 2.02771600  | -2.80860700 | -2.01416200 |
| H | 1.19125100  | -0.17752700 | -1.39864000 |
| C | 4.46259900  | -2.19850200 | -1.17606500 |
| C | 4.95149600  | -2.38705200 | -2.46906600 |
| C | 5.34157200  | -2.04838600 | -0.10174600 |
| C | 6.32905800  | -2.41334700 | -2.68402000 |
| H | 4.25377700  | -2.52401000 | -3.28857900 |
| C | 6.71716000  | -2.07330300 | -0.33222300 |
| H | 4.94606000  | -1.93326400 | 0.90236200  |
| C | 7.23288800  | -2.25709200 | -1.62359400 |
| H | 6.70949700  | -2.56426300 | -3.69187300 |
| H | 7.40217200  | -1.96502800 | 0.50613300  |
| C | 8.72375000  | -2.32595400 | -1.86074300 |
| H | 9.27791000  | -1.75698000 | -1.10653700 |
| H | 9.08341100  | -3.36256300 | -1.81464700 |
| H | 8.99220700  | -1.93422100 | -2.84784200 |

B3LYP/6-31G\* (Lanl2DZ for Cu)

Thermal correction to Gibbs Free Energy = 0.460772

Sum of electronic and thermal Free Energies = -4068.811804

M06-2X/6-311++G\*\* (Lanl2DZ for Cu)



Energy = -4069.1768727

Number of Imaginary Frequencies = 1

Lowest Frequency = 211.05i

No catalyst

**ts1'**

|   |             |             |             |
|---|-------------|-------------|-------------|
| C | 0.25769400  | -0.97799700 | 2.10221400  |
| C | 0.69869700  | -1.17375900 | 3.41107700  |
| C | 1.95097500  | -0.70674400 | 3.81254700  |
| C | 2.75908300  | -0.03601100 | 2.89188000  |
| C | 2.31992000  | 0.16899800  | 1.58621100  |
| C | 1.06233800  | -0.30333500 | 1.16516500  |
| C | 0.67846700  | -0.09727800 | -0.24238600 |
| C | 1.32677100  | -0.02328200 | -1.41095700 |
| C | 2.72877000  | -0.28273200 | -1.69296200 |
| O | 3.48344700  | 0.85978300  | -1.68887400 |
| O | 3.18818800  | -1.37013700 | -2.00017000 |
| C | 4.84291300  | 0.68397400  | -2.10892300 |
| H | -0.71039200 | -1.36859400 | 1.80599700  |
| H | 0.06181400  | -1.70187500 | 4.11609900  |
| H | 2.29298100  | -0.86234900 | 4.83212400  |
| H | 3.73337000  | 0.33943200  | 3.19372700  |
| H | 2.94206900  | 0.70778300  | 0.87859800  |
| H | 5.29101900  | 1.67864700  | -2.07616700 |
| H | 5.37704600  | 0.00359300  | -1.43901600 |
| H | 4.88710900  | 0.27910500  | -3.12415300 |
| C | -1.56423900 | 1.79920000  | 1.00822200  |
| C | -2.09078700 | 3.06245800  | 1.27990900  |
| C | -2.42705800 | 3.92946700  | 0.23832700  |
| C | -2.23423500 | 3.53066900  | -1.08482800 |
| C | -1.70578900 | 2.27041400  | -1.36645900 |
| C | -1.37102500 | 1.40919100  | -0.31947300 |
| N | -0.78777500 | 0.11371600  | -0.66835600 |
| C | -1.68299400 | -1.05392200 | -0.63301800 |
| C | -3.05123800 | -0.91413000 | -0.39206100 |
| C | -3.87736900 | -2.03978000 | -0.43972400 |
| C | -3.34756600 | -3.29542400 | -0.73181800 |
| C | -1.97881900 | -3.42286800 | -0.98032700 |
| C | -1.14178300 | -2.31000200 | -0.93426400 |
| H | -1.29991200 | 1.13029800  | 1.81855300  |
| H | -2.23681100 | 3.36758500  | 2.31224600  |
| H | -2.83615800 | 4.91161200  | 0.45761700  |
| H | -2.49000500 | 4.19935100  | -1.90168600 |
| H | -1.54862500 | 1.95511500  | -2.39375400 |

|   |             |             |             |
|---|-------------|-------------|-------------|
| H | -0.19659200 | 0.18316400  | -1.71618500 |
| H | -3.47395900 | 0.05798000  | -0.16790000 |
| H | -4.94029100 | -1.92561300 | -0.24574100 |
| H | -3.99380700 | -4.16782700 | -0.76625700 |
| H | -1.55385900 | -4.39510400 | -1.21309600 |
| H | -0.08000500 | -2.40813300 | -1.13027900 |

B3LYP/6-31G\*

Thermal correction to Gibbs Free Energy = 0.296291

Sum of electronic and thermal Free Energies = -1054.559147

M06-2X/6-311++G\*\*

Energy = -1054.7162404

Number of Imaginary Frequencies = 1

Lowest Frequency = 1413.21i

**in1'**

|   |             |             |             |
|---|-------------|-------------|-------------|
| C | -0.51425800 | -1.85780600 | 1.57084200  |
| C | -0.89577700 | -3.12412000 | 2.01010800  |
| C | -1.76915900 | -3.89624700 | 1.24258500  |
| C | -2.26463100 | -3.39123000 | 0.03827800  |
| C | -1.89522300 | -2.12005000 | -0.39310400 |
| C | -1.01579200 | -1.33761300 | 0.36790000  |
| C | -0.60061400 | 0.02157600  | -0.07782100 |
| C | -1.44542700 | 0.99699800  | -0.51883900 |
| C | -2.90917100 | 1.00680500  | -0.43755900 |
| O | -3.37604300 | 2.15630700  | -1.01485200 |
| O | -3.65878300 | 0.18211400  | 0.05408000  |
| C | -4.79860000 | 2.30590600  | -0.99668800 |
| H | 0.17242200  | -1.26155700 | 2.16443100  |
| H | -0.50747400 | -3.50883300 | 2.94932200  |
| H | -2.06113300 | -4.88735500 | 1.57970900  |
| H | -2.94356200 | -3.98771800 | -0.56494600 |
| H | -2.28777100 | -1.72704100 | -1.32467800 |
| H | -5.00087000 | 3.25708100  | -1.49175300 |
| H | -5.28468000 | 1.48532500  | -1.53300900 |
| H | -5.17648300 | 2.32194900  | 0.02994500  |
| C | 2.93177400  | -0.82050800 | 0.36858800  |
| C | 3.88574400  | -1.76068100 | -0.01250500 |
| C | 3.66752500  | -2.58177100 | -1.12212900 |
| C | 2.48856500  | -2.44409700 | -1.85522600 |
| C | 1.53604100  | -1.49235400 | -1.49079200 |
| C | 1.74613000  | -0.68173400 | -0.36789300 |
| N | 0.77790800  | 0.29544600  | 0.02312400  |
| C | 1.23894900  | 1.63337700  | 0.25257700  |
| C | 2.14435600  | 2.23869400  | -0.62764000 |
| C | 2.61295800  | 3.52802500  | -0.37169900 |

|   |             |             |             |
|---|-------------|-------------|-------------|
| C | 2.17509800  | 4.22857500  | 0.75249400  |
| C | 1.26573000  | 3.62696800  | 1.62722500  |
| C | 0.80396100  | 2.33559100  | 1.38577800  |
| H | 3.09674400  | -0.18953900 | 1.23653900  |
| H | 4.79924600  | -1.85963400 | 0.56781200  |
| H | 4.41067700  | -3.31896400 | -1.41247000 |
| H | 2.31057100  | -3.06993000 | -2.72561000 |
| H | 0.63039800  | -1.37207200 | -2.07616300 |
| H | -1.01342300 | 1.91567100  | -0.89821100 |
| H | 2.48120600  | 1.69552200  | -1.50492100 |
| H | 3.31612400  | 3.98699700  | -1.06150400 |
| H | 2.53851400  | 5.23351600  | 0.94764900  |
| H | 0.92256700  | 4.16089100  | 2.50927900  |
| H | 0.10110400  | 1.86436600  | 2.06600400  |

B3LYP/6-31G\*

Thermal correction to Gibbs Free Energy = 0.302469

Sum of electronic and thermal Free Energies = -1054.669625

M06-2X/6-311++G\*\*

Energy = -1054.82512870

No imaginary frequency
